# Supplementary material for: A sustainable waste-to-protein system to maximise waste resource utilisation for developing food- and feed-grade protein solutions
Source: Royal Society of Chemistry journal article supplement (doi:10.1039/d2gc03095k), 2022-12-08
Supplement: d2gc03095k2.zip [file d2gc03095k2.zip]

## Sheet: Supplementary 2 Title Page
This Supplementary Table ST2 includes the following information
ST2.1 Production & composition
Countries were clustered into 11 regions: Africa, Caribbean, Central & West Asia, East Asia, Europe, Latin America, North America, Pacific, South Asia, South East Asia. Crop products were clustered into 11 product categories: brewing, cereal grains, fibre crops, fruits & berries, oil crops, pulses, roots & tubers, seeds & nuts, sugar crops, tobacco, vegetables. Production values (megatonnes/year)…
ST2.2 Region Residue production
Residue cellulose, hemi-cellulose and lignin content and residue production (megatonnes/year) were calculated as a sum of all residue products for all countries included in each region, calculated in SI-2a.
ST2.3 Residue lignocellulosic %
Average Lignin, hemicellulose and cellulose (% dry mass) were calculated for each product category by taking an average of biochemical analysis values reported for each residue associated with a crop belonging to that product category (TNO Biobased and circular technologies, 2021).
ST2.4 data summary
Pivot table to give an overview of regions, residue cellulose, hemicellulose, lignin and residue production (megatonnes per year). Filter options are available to sort by product category or product.
Abbreviation	Definition
nes	Not elsewhere specified
RPR	Residue to Product Ratio
inc.	including
References
Food and Agriculture Organization of the United Nations. FAOSTAT Statistical Database. [Rome] :FAO, 1997.
Koopmans, A. and Koppejan, J., 1997. Agricultural and forest residues-generation, utilization and availability. Regional consultation on modern applications of biomass energy, 6, p.10.
TNO BIOBASED AND CIRCULAR TECHNOLOGIES 2021. Phyllis2, database for (treated) biomass, algae, feedstocks for biogas production and biochar.

## Sheet: ST2.1 Production & composition
Region	Country	Product	Product category	tonnes/year, 2018	RPR	Residue Production Megatonnes/year	Average Residue Cellulose Content %dry wt	Average Residue Hemi-Cellulose Content %dry wt	Average Residue Lignin Content %dry wt	Average Residue Cellulose content Megatonnes/year	Average Residue Hemi-cellulose contents, Megatonnes/year	Average Residue Lignin content, Megatonnes/year
Latin America	Belize	Coffee, green	Brewing	90	21	0.00189	0.498	0.095	0.221	0.00094122	0.00017955	0.00041769
Latin America	Bolivia (Plurinational State of)	Coffee, green	Brewing	22121	21	0.464541	0.498	0.095	0.221	0.231341	0.0441314	0.102664
Latin America	Brazil	Coffee, green	Brewing	3556638	21	74.6894	0.498	0.095	0.221	37.1953	7.09549	16.5064
South East Asia	Cambodia	Coffee, green	Brewing	381	21	0.008001	0.498	0.095	0.221	0.0039845	0.000760095	0.00176822
East Asia	China	Coffee, green	Brewing	100332	21	2.10697	0.498	0.095	0.221	1.04927	0.200162	0.465641
East Asia	Taiwan	Coffee, green	Brewing	0	21	0	0.498	0.095	0.221	0	0	0
Latin America	Colombia	Coffee, green	Brewing	720634	21	15.1333	0.498	0.095	0.221	7.53639	1.43766	3.34446
Latin America	Costa Rica	Coffee, green	Brewing	85340	21	1.79214	0.498	0.095	0.221	0.892486	0.170253	0.396063
Latin America	Ecuador	Coffee, green	Brewing	5065	21	0.106365	0.498	0.095	0.221	0.0529698	0.0101047	0.0235067
Latin America	El Salvador	Coffee, green	Brewing	80167	21	1.68351	0.498	0.095	0.221	0.838386	0.159933	0.372055
Latin America	Guatemala	Coffee, green	Brewing	245580	21	5.15718	0.498	0.095	0.221	2.56828	0.489932	1.13974
Latin America	Guyana	Coffee, green	Brewing	403	21	0.008463	0.498	0.095	0.221	0.00421457	0.000803985	0.00187032
Latin America	Honduras	Coffee, green	Brewing	481053	21	10.1021	0.498	0.095	0.221	5.03085	0.959701	2.23257
South Asia	India	Coffee, green	Brewing	326982	21	6.86662	0.498	0.095	0.221	3.41958	0.652329	1.51752
South East Asia	Indonesia	Coffee, green	Brewing	722461	21	15.1717	0.498	0.095	0.221	7.5555	1.44131	3.35294
South East Asia	Laos	Coffee, green	Brewing	154435	21	3.24314	0.498	0.095	0.221	1.61508	0.308098	0.716733
South East Asia	Malaysia	Coffee, green	Brewing	8743	21	0.183603	0.498	0.095	0.221	0.0914343	0.0174423	0.0405763
Latin America	Mexico	Coffee, green	Brewing	158325	21	3.32483	0.498	0.095	0.221	1.65576	0.315858	0.734786
South East Asia	Myanmar	Coffee, green	Brewing	8607	21	0.180747	0.498	0.095	0.221	0.090012	0.017171	0.0399451
South Asia	Nepal	Coffee, green	Brewing	513	21	0.010773	0.498	0.095	0.221	0.00536495	0.00102344	0.00238083
Latin America	Nicaragua	Coffee, green	Brewing	141931	21	2.98055	0.498	0.095	0.221	1.48431	0.283152	0.658702
Latin America	Panama	Coffee, green	Brewing	6729	21	0.141309	0.498	0.095	0.221	0.0703719	0.0134244	0.0312293
Latin America	Paraguay	Coffee, green	Brewing	441	21	0.009261	0.498	0.095	0.221	0.00461198	0.000879795	0.00204668
Latin America	Peru	Coffee, green	Brewing	369622	21	7.76206	0.498	0.095	0.221	3.86551	0.737396	1.71542
South East Asia	Philippines	Coffee, green	Brewing	60313	21	1.26657	0.498	0.095	0.221	0.630753	0.120324	0.279913
Central & West Asia	Saudi Arabia	Coffee, green	Brewing	0	21	0	0.498	0.095	0.221	0	0	0
South Asia	Sri Lanka	Coffee, green	Brewing	6445	21	0.135345	0.498	0.095	0.221	0.0674018	0.0128578	0.0299112
Latin America	Suriname	Coffee, green	Brewing	5	21	0.000105	0.498	0.095	0.221	5.229e-05	9.975e-06	2.3205e-05
South East Asia	Thailand	Coffee, green	Brewing	32684	21	0.686364	0.498	0.095	0.221	0.341809	0.0652046	0.151686
South East Asia	Timor-Leste	Coffee, green	Brewing	8876	21	0.186396	0.498	0.095	0.221	0.0928252	0.0177076	0.0411935
North America	United States of America	Coffee, green	Brewing	2380	21	0.04998	0.498	0.095	0.221	0.02489	0.0047481	0.0110456
Latin America	Venezuela (Bolivarian Republic of)	Coffee, green	Brewing	50080	21	1.05168	0.498	0.095	0.221	0.523737	0.0999096	0.232421
South East Asia	Viet Nam	Coffee, green	Brewing	1616307	21	33.9424	0.498	0.095	0.221	16.9033	3.22453	7.50128
Central & West Asia	Yemen	Coffee, green	Brewing	19338	21	0.406098	0.498	0.095	0.221	0.202237	0.0385793	0.0897477
Pacific		Coffee, green	Brewing	58070	21	1.21947	0.498	0.095	0.221	0.607296	0.11585	0.269503
Europe		Coffee, green	Brewing		21	0	0.498	0.095	0.221	0	0	0
Africa		Coffee, green	Brewing	1171129	21	24.5937	0.498	0.095	0.221	12.2477	2.3364	5.43521
Caribbean		Coffee, green	Brewing	80901	21	1.69892	0.498	0.095	0.221	0.846063	0.161397	0.375462
World		Coffee, green	Brewing	10303118	21	216.365	0.498	0.095	0.221	107.75	20.5547	47.8168
South Asia	Afghanistan	Barley	Cereal Grains	56781	1.75	0.0993668	0.3451	0.2392	0.1356	0.0342915	0.0237685	0.0134741
Latin America	Argentina	Barley	Cereal Grains	5061069	1.75	8.85687	0.3451	0.2392	0.1356	3.05651	2.11856	1.20099
Central & West Asia	Armenia	Barley	Cereal Grains	124167	1.75	0.217292	0.3451	0.2392	0.1356	0.0749876	0.0519763	0.0294648
Central & West Asia	Azerbaijan	Barley	Cereal Grains	916036	1.75	1.60306	0.3451	0.2392	0.1356	0.553217	0.383453	0.217375
South Asia	Bangladesh	Barley	Cereal Grains	244	1.75	0.000427	0.3451	0.2392	0.1356	0.000147358	0.000102138	5.79012e-05
South Asia	Bhutan	Barley	Cereal Grains	1994	1.75	0.0034895	0.3451	0.2392	0.1356	0.00120423	0.000834688	0.000473176
Latin America	Bolivia (Plurinational State of)	Barley	Cereal Grains	46620	1.75	0.081585	0.3451	0.2392	0.1356	0.028155	0.0195151	0.0110629
Latin America	Brazil	Barley	Cereal Grains	330374	1.75	0.578155	0.3451	0.2392	0.1356	0.199521	0.138295	0.0783978
North America	Canada	Barley	Cereal Grains	8379700	1.75	14.6645	0.3451	0.2392	0.1356	5.06071	3.50774	1.9885
Latin America	Chile	Barley	Cereal Grains	170652	1.75	0.298641	0.3451	0.2392	0.1356	0.103061	0.0714349	0.0404957
East Asia	China	Barley	Cereal Grains	1487906	1.75	2.60384	0.3451	0.2392	0.1356	0.898584	0.622837	0.35308
East Asia	Taiwan	Barley	Cereal Grains		1.75	0	0.3451	0.2392	0.1356	0	0	0
Latin America	Colombia	Barley	Cereal Grains	11001	1.75	0.0192518	0.3451	0.2392	0.1356	0.00664378	0.00460502	0.00261054
East Asia	Democratic People's Republic of Korea	Barley	Cereal Grains	22000	1.75	0.0385	0.3451	0.2392	0.1356	0.0132864	0.0092092	0.0052206
Latin America	Ecuador	Barley	Cereal Grains	13674	1.75	0.0239295	0.3451	0.2392	0.1356	0.00825807	0.00572394	0.00324484
Central & West Asia	Georgia	Barley	Cereal Grains	57700	1.75	0.100975	0.3451	0.2392	0.1356	0.0348465	0.0241532	0.0136922
Latin America	Guatemala	Barley	Cereal Grains	17	1.75	2.975e-05	0.3451	0.2392	0.1356	1.02667e-05	7.1162e-06	4.0341e-06
South Asia	India	Barley	Cereal Grains	1780000	1.75	3.115	0.3451	0.2392	0.1356	1.07499	0.745108	0.422394
Central & West Asia	Iran	Barley	Cereal Grains	2800000	1.75	4.9	0.3451	0.2392	0.1356	1.69099	1.17208	0.66444
Central & West Asia	Iraq	Barley	Cereal Grains	571283	1.75	0.999745	0.3451	0.2392	0.1356	0.345012	0.239139	0.135565
Central & West Asia	Israel	Barley	Cereal Grains	8750	1.75	0.0153125	0.3451	0.2392	0.1356	0.00528434	0.00366275	0.00207638
East Asia	Japan	Barley	Cereal Grains	174700	1.75	0.305725	0.3451	0.2392	0.1356	0.105506	0.0731294	0.0414563
Central & West Asia	Jordan	Barley	Cereal Grains	35173	1.75	0.0615528	0.3451	0.2392	0.1356	0.0212419	0.0147234	0.00834655
Central & West Asia	Kazakhstan	Barley	Cereal Grains	3971266	1.75	6.94972	0.3451	0.2392	0.1356	2.39835	1.66237	0.942381
Central & West Asia	Kuwait	Barley	Cereal Grains	2338	1.75	0.0040915	0.3451	0.2392	0.1356	0.00141198	0.000978687	0.000554807
Central & West Asia	Kyrgyzstan	Barley	Cereal Grains	429306	1.75	0.751286	0.3451	0.2392	0.1356	0.259269	0.179707	0.101874
Central & West Asia	Lebanon	Barley	Cereal Grains	31446	1.75	0.0550305	0.3451	0.2392	0.1356	0.018991	0.0131633	0.00746214
Latin America	Mexico	Barley	Cereal Grains	1008642	1.75	1.76512	0.3451	0.2392	0.1356	0.609144	0.422218	0.239351
East Asia	Mongolia	Barley	Cereal Grains	2355	1.75	0.00412125	0.3451	0.2392	0.1356	0.00142224	0.000985803	0.000558841
South East Asia	Myanmar	Barley	Cereal Grains		1.75	0	0.3451	0.2392	0.1356	0	0	0
South Asia	Nepal	Barley	Cereal Grains	30510	1.75	0.0533925	0.3451	0.2392	0.1356	0.0184258	0.0127715	0.00724002
Central & West Asia	Oman	Barley	Cereal Grains	1661	1.75	0.00290675	0.3451	0.2392	0.1356	0.00100312	0.000695295	0.000394155
South Asia	Pakistan	Barley	Cereal Grains	55131	1.75	0.0964793	0.3451	0.2392	0.1356	0.033295	0.0230778	0.0130826
Central & West Asia	Palestine	Barley	Cereal Grains	14961	1.75	0.0261818	0.3451	0.2392	0.1356	0.00903532	0.00626267	0.00355025
Latin America	Peru	Barley	Cereal Grains	207215	1.75	0.362626	0.3451	0.2392	0.1356	0.125142	0.0867402	0.0491721
Central & West Asia	Qatar	Barley	Cereal Grains	237	1.75	0.00041475	0.3451	0.2392	0.1356	0.00014313	9.92082e-05	5.62401e-05
East Asia	Republic of Korea	Barley	Cereal Grains	102702	1.75	0.179729	0.3451	0.2392	0.1356	0.0620243	0.0429911	0.0243712
Central & West Asia	Saudi Arabia	Barley	Cereal Grains	624702	1.75	1.09323	0.3451	0.2392	0.1356	0.377273	0.2615	0.148242
Central & West Asia	Syria	Barley	Cereal Grains	390000	1.75	0.6825	0.3451	0.2392	0.1356	0.235531	0.163254	0.092547
Central & West Asia	Tajikistan	Barley	Cereal Grains	108817	1.75	0.19043	0.3451	0.2392	0.1356	0.0657173	0.0455508	0.0258223
South East Asia	Thailand	Barley	Cereal Grains	28288	1.75	0.049504	0.3451	0.2392	0.1356	0.0170838	0.0118414	0.00671274
Central & West Asia	Turkey	Barley	Cereal Grains	7000000	1.75	12.25	0.3451	0.2392	0.1356	4.22748	2.9302	1.6611
Central & West Asia	Turkmenistan	Barley	Cereal Grains	18969	1.75	0.0331958	0.3451	0.2392	0.1356	0.0114559	0.00794042	0.00450134
Central & West Asia	United Arab Emirates	Barley	Cereal Grains	114	1.75	0.0001995	0.3451	0.2392	0.1356	6.88475e-05	4.77204e-05	2.70522e-05
North America	United States of America	Barley	Cereal Grains	3332970	1.75	5.8327	0.3451	0.2392	0.1356	2.01286	1.39518	0.790914
Latin America	Uruguay	Barley	Cereal Grains	637800	1.75	1.11615	0.3451	0.2392	0.1356	0.385183	0.266983	0.15135
Central & West Asia	Uzbekistan	Barley	Cereal Grains	111760	1.75	0.19558	0.3451	0.2392	0.1356	0.0674947	0.0467827	0.0265206
Central & West Asia	Yemen	Barley	Cereal Grains	19667	1.75	0.0344173	0.3451	0.2392	0.1356	0.0118774	0.00823261	0.00466698
Pacific		Barley	Cereal Grains	9633556	1.75	16.8587	0.3451	0.2392	0.1356	5.81795	4.03261	2.28604
Europe		Barley	Cereal Grains	83123493	1.75	145.466	0.3451	0.2392	0.1356	50.2004	34.7955	19.7252
Africa		Barley	Cereal Grains	8466600	1.75	14.8165	0.3451	0.2392	0.1356	5.11319	3.54412	2.00912
World		Barley	Cereal Grains	141423028	1.75	247.49	0.3451	0.2392	0.1356	85.4089	59.1997	33.5597
South Asia	Bhutan	Buckwheat	Cereal Grains	3924	1.75	0.006867	0.3451	0.2392	0.1356	0.0023698	0.00164259	0.000931165
Latin America	Brazil	Buckwheat	Cereal Grains	66173	1.75	0.115803	0.3451	0.2392	0.1356	0.0399635	0.0277	0.0157029
North America	Canada	Buckwheat	Cereal Grains	15000	1.75	0.02625	0.3451	0.2392	0.1356	0.00905888	0.006279	0.0035595
East Asia	China	Buckwheat	Cereal Grains	1134988	1.75	1.98623	0.3451	0.2392	0.1356	0.685448	0.475106	0.269333
Central & West Asia	Georgia	Buckwheat	Cereal Grains	112	1.75	0.000196	0.3451	0.2392	0.1356	6.76396e-05	4.68832e-05	2.65776e-05
Latin America	Guatemala	Buckwheat	Cereal Grains		1.75	0	0.3451	0.2392	0.1356	0	0	0
East Asia	Japan	Buckwheat	Cereal Grains	29000	1.75	0.05075	0.3451	0.2392	0.1356	0.0175138	0.0121394	0.0068817
Central & West Asia	Kazakhstan	Buckwheat	Cereal Grains	82704	1.75	0.144732	0.3451	0.2392	0.1356	0.049947	0.0346199	0.0196257
Central & West Asia	Kyrgyzstan	Buckwheat	Cereal Grains	38	1.75	6.65e-05	0.3451	0.2392	0.1356	2.29492e-05	1.59068e-05	9.0174e-06
South Asia	Nepal	Buckwheat	Cereal Grains	11472	1.75	0.020076	0.3451	0.2392	0.1356	0.00692823	0.00480218	0.00272231
East Asia	Republic of Korea	Buckwheat	Cereal Grains	1624	1.75	0.002842	0.3451	0.2392	0.1356	0.000980774	0.000679806	0.000385375
Central & West Asia	Tajikistan	Buckwheat	Cereal Grains		1.75	0	0.3451	0.2392	0.1356	0	0	0
North America	United States of America	Buckwheat	Cereal Grains	84440	1.75	0.14777	0.3451	0.2392	0.1356	0.0509954	0.0353466	0.0200376
Central & West Asia	Uzbekistan	Buckwheat	Cereal Grains		1.75	0	0.3451	0.2392	0.1356	0	0	0
Europe		Buckwheat	Cereal Grains	1457994	1.75	2.55149	0.3451	0.2392	0.1356	0.880519	0.610316	0.345982
Africa		Buckwheat	Cereal Grains	17825	1.75	0.0311937	0.3451	0.2392	0.1356	0.010765	0.00746154	0.00422987
World		Buckwheat	Cereal Grains	2905294	1.75	5.08426	0.3451	0.2392	0.1356	1.75458	1.21616	0.689426
Latin America	Argentina	Cereals nes	Cereal Grains	15823	1.75	0.0276902	0.3451	0.2392	0.1356	0.00955591	0.00662351	0.0037548
Central & West Asia	Armenia	Cereals nes	Cereal Grains	9366	1.75	0.0163905	0.3451	0.2392	0.1356	0.00565636	0.00392061	0.00222255
South Asia	Bhutan	Cereals nes	Cereal Grains	1096	1.75	0.001918	0.3451	0.2392	0.1356	0.000661902	0.000458786	0.000260081
Latin America	Bolivia (Plurinational State of)	Cereals nes	Cereal Grains	777	1.75	0.00135975	0.3451	0.2392	0.1356	0.00046925	0.000325252	0.000184382
East Asia	China	Cereals nes	Cereal Grains	88991	1.75	0.155734	0.3451	0.2392	0.1356	0.0537439	0.0372516	0.0211176
East Asia	Taiwan	Cereals nes	Cereal Grains	386	1.75	0.0006755	0.3451	0.2392	0.1356	0.000233115	0.00016158	9.15978e-05
Latin America	Colombia	Cereals nes	Cereal Grains	4099	1.75	0.00717325	0.3451	0.2392	0.1356	0.00247549	0.00171584	0.000972693
Central & West Asia	Georgia	Cereals nes	Cereal Grains	7555	1.75	0.0132213	0.3451	0.2392	0.1356	0.00456265	0.00316252	0.0017928
Central & West Asia	Kazakhstan	Cereals nes	Cereal Grains	451725	1.75	0.790519	0.3451	0.2392	0.1356	0.272808	0.189092	0.107194
Latin America	Mexico	Cereals nes	Cereal Grains	7115	1.75	0.0124513	0.3451	0.2392	0.1356	0.00429693	0.00297834	0.00168839
East Asia	Mongolia	Cereals nes	Cereal Grains	5408	1.75	0.009464	0.3451	0.2392	0.1356	0.00326603	0.00226379	0.00128332
South East Asia	Myanmar	Cereals nes	Cereal Grains	12133	1.75	0.0212328	0.3451	0.2392	0.1356	0.00732742	0.00507887	0.00287916
Central & West Asia	Oman	Cereals nes	Cereal Grains	1357	1.75	0.00237475	0.3451	0.2392	0.1356	0.000819526	0.00056804	0.000322016
Central & West Asia	Palestine	Cereals nes	Cereal Grains	679	1.75	0.00118825	0.3451	0.2392	0.1356	0.000410065	0.000284229	0.000161127
Latin America	Peru	Cereals nes	Cereal Grains	7918	1.75	0.0138565	0.3451	0.2392	0.1356	0.00478188	0.00331447	0.00187894
Central & West Asia	Qatar	Cereals nes	Cereal Grains	190	1.75	0.0003325	0.3451	0.2392	0.1356	0.000114746	7.9534e-05	4.5087e-05
East Asia	Republic of Korea	Cereals nes	Cereal Grains	12907	1.75	0.0225872	0.3451	0.2392	0.1356	0.00779486	0.00540287	0.00306283
South East Asia	Thailand	Cereals nes	Cereal Grains	268453	1.75	0.469793	0.3451	0.2392	0.1356	0.162125	0.112374	0.0637039
North America	United States of America	Cereals nes	Cereal Grains		1.75	0	0.3451	0.2392	0.1356	0	0	0
Central & West Asia	Uzbekistan	Cereals nes	Cereal Grains	5541522	1.75	9.69766	0.3451	0.2392	0.1356	3.34666	2.31968	1.315
Central & West Asia	Yemen	Cereals nes	Cereal Grains		1.75	0	0.3451	0.2392	0.1356	0	0	0
Pacific		Cereals nes	Cereal Grains	10770	1.75	0.0188475	0.3451	0.2392	0.1356	0.00650427	0.00450832	0.00255572
Europe		Cereals nes	Cereal Grains	480875	1.75	0.841531	0.3451	0.2392	0.1356	0.290412	0.201294	0.114112
Africa		Cereals nes	Cereal Grains	6121950	1.75	10.7134	0.3451	0.2392	0.1356	3.6972	2.56265	1.45274
World		Cereals nes	Cereal Grains	13050709	1.75	22.8387	0.3451	0.2392	0.1356	7.88165	5.46303	3.09693
South Asia	Afghanistan	Cereals, Total	Cereal Grains	4140568	1.75	7.24599	0.3451	0.2392	0.1356	2.50059	1.73324	0.982557
Latin America	Argentina	Cereals, Total	Cereal Grains	70591016	1.75	123.534	0.3451	0.2392	0.1356	42.6317	29.5494	16.7512
Central & West Asia	Armenia	Cereals, Total	Cereal Grains	334342	1.75	0.585098	0.3451	0.2392	0.1356	0.201917	0.139956	0.0793394
Central & West Asia	Azerbaijan	Cereals, Total	Cereal Grains	3181818	1.75	5.56818	0.3451	0.2392	0.1356	1.92158	1.33191	0.755045
South Asia	Bangladesh	Cereals, Total	Cereal Grains	60817838	1.75	106.431	0.3451	0.2392	0.1356	36.7294	25.4583	14.4321
Latin America	Belize	Cereals, Total	Cereal Grains	99341	1.75	0.173847	0.3451	0.2392	0.1356	0.0599945	0.0415841	0.0235736
South Asia	Bhutan	Cereals, Total	Cereal Grains	194612	1.75	0.340571	0.3451	0.2392	0.1356	0.117531	0.0814646	0.0461814
Latin America	Bolivia (Plurinational State of)	Cereals, Total	Cereal Grains	3267425	1.75	5.71799	0.3451	0.2392	0.1356	1.97328	1.36774	0.77536
Latin America	Brazil	Cereals, Total	Cereal Grains	103064737	1.75	180.363	0.3451	0.2392	0.1356	62.2434	43.1429	24.4573
South East Asia	Brunei	Cereals, Total	Cereal Grains	1569	1.75	0.00274575	0.3451	0.2392	0.1356	0.000947558	0.000656783	0.000372324
South East Asia	Cambodia	Cereals, Total	Cereal Grains	11251546	1.75	19.6902	0.3451	0.2392	0.1356	6.79509	4.7099	2.66999
North America	Canada	Cereals, Total	Cereal Grains	58095800	1.75	101.668	0.3451	0.2392	0.1356	35.0855	24.3189	13.7861
Latin America	Chile	Cereals, Total	Cereal Grains	3661435	1.75	6.40751	0.3451	0.2392	0.1356	2.21123	1.53268	0.868859
East Asia	China	Cereals, Total	Cereal Grains	612170193	1.75	1071.3	0.3451	0.2392	0.1356	369.705	256.254	145.268
East Asia	Hong Kong	Cereals, Total	Cereal Grains	0	1.75	0	0.3451	0.2392	0.1356	0	0	0
East Asia	Taiwan	Cereals, Total	Cereal Grains	2134393	1.75	3.73519	0.3451	0.2392	0.1356	1.28901	0.893457	0.506491
Latin America	Colombia	Cereals, Total	Cereal Grains	4757682	1.75	8.32594	0.3451	0.2392	0.1356	2.87328	1.99157	1.129
Latin America	Costa Rica	Cereals, Total	Cereal Grains	163669	1.75	0.286421	0.3451	0.2392	0.1356	0.0988438	0.0685118	0.0388387
East Asia	Democratic People's Republic of Korea	Cereals, Total	Cereal Grains	4211839	1.75	7.37072	0.3451	0.2392	0.1356	2.54363	1.76308	0.999469
Latin America	Ecuador	Cereals, Total	Cereal Grains	2711410	1.75	4.74497	0.3451	0.2392	0.1356	1.63749	1.135	0.643418
Latin America	El Salvador	Cereals, Total	Cereal Grains	817563	1.75	1.43074	0.3451	0.2392	0.1356	0.493747	0.342232	0.194008
Latin America	French Guyana	Cereals, Total	Cereal Grains	3270	1.75	0.0057225	0.3451	0.2392	0.1356	0.00197483	0.00136882	0.000775971
Central & West Asia	Georgia	Cereals, Total	Cereal Grains	371461	1.75	0.650057	0.3451	0.2392	0.1356	0.224335	0.155494	0.0881477
Latin America	Guatemala	Cereals, Total	Cereal Grains	2004065	1.75	3.50711	0.3451	0.2392	0.1356	1.2103	0.838902	0.475565
Latin America	Guyana	Cereals, Total	Cereal Grains	968756	1.75	1.69532	0.3451	0.2392	0.1356	0.585056	0.405521	0.229886
Latin America	Honduras	Cereals, Total	Cereal Grains	790693	1.75	1.38371	0.3451	0.2392	0.1356	0.477519	0.330984	0.187631
South Asia	India	Cereals, Total	Cereal Grains	318320000	1.75	557.06	0.3451	0.2392	0.1356	192.241	133.249	75.5373
South East Asia	Indonesia	Cereals, Total	Cereal Grains	113290938	1.75	198.259	0.3451	0.2392	0.1356	68.4192	47.4236	26.8839
Central & West Asia	Iran	Cereals, Total	Cereal Grains	20646288	1.75	36.131	0.3451	0.2392	0.1356	12.4688	8.64254	4.89936
Central & West Asia	Iraq	Cereals, Total	Cereal Grains	4290645	1.75	7.50863	0.3451	0.2392	0.1356	2.59123	1.79606	1.01817
Central & West Asia	Israel	Cereals, Total	Cereal Grains	209321	1.75	0.366312	0.3451	0.2392	0.1356	0.126414	0.0876218	0.0496719
East Asia	Japan	Cereals, Total	Cereal Grains	10696746	1.75	18.7193	0.3451	0.2392	0.1356	6.46003	4.47766	2.53834
Central & West Asia	Jordan	Cereals, Total	Cereal Grains	91196	1.75	0.159593	0.3451	0.2392	0.1356	0.0550755	0.0381746	0.0216408
Central & West Asia	Kazakhstan	Cereals, Total	Cereal Grains	20196034	1.75	35.3431	0.3451	0.2392	0.1356	12.1969	8.45406	4.79252
Central & West Asia	Kuwait	Cereals, Total	Cereal Grains	11216	1.75	0.019628	0.3451	0.2392	0.1356	0.00677362	0.00469502	0.00266156
Central & West Asia	Kyrgyzstan	Cereals, Total	Cereal Grains	1783480	1.75	3.12109	0.3451	0.2392	0.1356	1.07709	0.746565	0.42322
South East Asia	Laos	Cereals, Total	Cereal Grains	4566380	1.75	7.99116	0.3451	0.2392	0.1356	2.75775	1.91149	1.0836
Central & West Asia	Lebanon	Cereals, Total	Cereal Grains	170738	1.75	0.298791	0.3451	0.2392	0.1356	0.103113	0.0714709	0.0405161
South East Asia	Malaysia	Cereals, Total	Cereal Grains	2795349	1.75	4.89186	0.3451	0.2392	0.1356	1.68818	1.17013	0.663336
South Asia	Maldives	Cereals, Total	Cereal Grains	203	1.75	0.00035525	0.3451	0.2392	0.1356	0.000122597	8.49758e-05	4.81719e-05
Latin America	Mexico	Cereals, Total	Cereal Grains	36068979	1.75	63.1207	0.3451	0.2392	0.1356	21.783	15.0985	8.55917
East Asia	Mongolia	Cereals, Total	Cereal Grains	453849	1.75	0.794236	0.3451	0.2392	0.1356	0.274091	0.189981	0.107698
South East Asia	Myanmar	Cereals, Total	Cereal Grains	28014055	1.75	49.0246	0.3451	0.2392	0.1356	16.9184	11.7267	6.64774
South Asia	Nepal	Cereals, Total	Cereal Grains	9930178	1.75	17.3778	0.3451	0.2392	0.1356	5.99708	4.15677	2.35643
Latin America	Nicaragua	Cereals, Total	Cereal Grains	820382	1.75	1.43567	0.3451	0.2392	0.1356	0.495449	0.343412	0.194677
Central & West Asia	Oman	Cereals, Total	Cereal Grains	64754	1.75	0.11332	0.3451	0.2392	0.1356	0.0391066	0.027106	0.0153661
South Asia	Pakistan	Cereals, Total	Cereal Grains	42741865	1.75	74.7983	0.3451	0.2392	0.1356	25.8129	17.8917	10.1426
Central & West Asia	Palestine	Cereals, Total	Cereal Grains	50084	1.75	0.087647	0.3451	0.2392	0.1356	0.030247	0.0209652	0.0118849
Latin America	Panama	Cereals, Total	Cereal Grains	429251	1.75	0.751189	0.3451	0.2392	0.1356	0.259235	0.179684	0.101861
Latin America	Paraguay	Cereals, Total	Cereal Grains	7069529	1.75	12.3717	0.3451	0.2392	0.1356	4.26947	2.9593	1.6776
Latin America	Peru	Cereals, Total	Cereal Grains	5644208	1.75	9.87736	0.3451	0.2392	0.1356	3.40868	2.36267	1.33937
South East Asia	Philippines	Cereals, Total	Cereal Grains	26838577	1.75	46.9675	0.3451	0.2392	0.1356	16.2085	11.2346	6.36879
Central & West Asia	Qatar	Cereals, Total	Cereal Grains	2308	1.75	0.004039	0.3451	0.2392	0.1356	0.00139386	0.000966129	0.000547688
East Asia	Republic of Korea	Cereals, Total	Cereal Grains	5428929	1.75	9.50063	0.3451	0.2392	0.1356	3.27867	2.27255	1.28828
Central & West Asia	Saudi Arabia	Cereals, Total	Cereal Grains	1378867	1.75	2.41302	0.3451	0.2392	0.1356	0.832732	0.577194	0.327205
South Asia	Sri Lanka	Cereals, Total	Cereal Grains	4208101	1.75	7.36418	0.3451	0.2392	0.1356	2.54138	1.76151	0.998582
Latin America	Suriname	Cereals, Total	Cereal Grains	274001	1.75	0.479502	0.3451	0.2392	0.1356	0.165476	0.114697	0.0650204
Central & West Asia	Syria	Cereals, Total	Cereal Grains	1713213	1.75	2.99812	0.3451	0.2392	0.1356	1.03465	0.717151	0.406545
Central & West Asia	Tajikistan	Cereals, Total	Cereal Grains	1218840	1.75	2.13297	0.3451	0.2392	0.1356	0.736088	0.510206	0.289231
South East Asia	Thailand	Cereals, Total	Cereal Grains	37564640	1.75	65.7381	0.3451	0.2392	0.1356	22.6862	15.7246	8.91409
South East Asia	Timor-Leste	Cereals, Total	Cereal Grains	188212	1.75	0.329371	0.3451	0.2392	0.1356	0.113666	0.0787855	0.0446627
Central & West Asia	Turkey	Cereals, Total	Cereal Grains	34395628	1.75	60.1923	0.3451	0.2392	0.1356	20.7724	14.398	8.16208
Central & West Asia	Turkmenistan	Cereals, Total	Cereal Grains	1188969	1.75	2.0807	0.3451	0.2392	0.1356	0.718048	0.497702	0.282142
Central & West Asia	United Arab Emirates	Cereals, Total	Cereal Grains	9056	1.75	0.015848	0.3451	0.2392	0.1356	0.00546914	0.00379084	0.00214899
North America	United States of America	Cereals, Total	Cereal Grains	467951140	1.75	818.914	0.3451	0.2392	0.1356	282.607	195.884	111.045
Latin America	Uruguay	Cereals, Total	Cereal Grains	3386271	1.75	5.92597	0.3451	0.2392	0.1356	2.04505	1.41749	0.803562
Central & West Asia	Uzbekistan	Cereals, Total	Cereal Grains	11718663	1.75	20.5077	0.3451	0.2392	0.1356	7.07719	4.90543	2.78084
Latin America	Venezuela (Bolivarian Republic of)	Cereals, Total	Cereal Grains	1850657	1.75	3.23865	0.3451	0.2392	0.1356	1.11766	0.774685	0.439161
South East Asia	Viet Nam	Cereals, Total	Cereal Grains	48923673	1.75	85.6164	0.3451	0.2392	0.1356	29.5462	20.4794	11.6096
Central & West Asia	Yemen	Cereals, Total	Cereal Grains	478317	1.75	0.837055	0.3451	0.2392	0.1356	0.288868	0.200223	0.113505
Pacific		Cereals, Total	Cereal Grains	34881397	1.75	61.0424	0.3451	0.2392	0.1356	21.0657	14.6014	8.27736
Europe		Cereals, Total	Cereal Grains	498592607	1.75	872.537	0.3451	0.2392	0.1356	301.113	208.711	118.316
Africa		Cereals, Total	Cereal Grains	202603227	1.75	354.556	0.3451	0.2392	0.1356	122.357	84.8097	48.0777
Caribbean		Cereals, Total	Cereal Grains	2006794	1.75	3.51189	0.3451	0.2392	0.1356	1.21195	0.840044	0.476212
World		Cereals, Total	Cereal Grains	2962867626	1.75	5185.02	0.3451	0.2392	0.1356	1789.35	1240.26	703.088
North America	Canada	Grain, mixed	Cereal Grains	194700	1.75	0.340725	0.3451	0.2392	0.1356	0.117584	0.0815014	0.0462023
Central & West Asia	Kyrgyzstan	Grain, mixed	Cereal Grains	78	1.75	0.0001365	0.3451	0.2392	0.1356	4.71062e-05	3.26508e-05	1.85094e-05
Central & West Asia	Turkey	Grain, mixed	Cereal Grains	0	1.75	0	0.3451	0.2392	0.1356	0	0	0
Central & West Asia	Turkmenistan	Grain, mixed	Cereal Grains		1.75	0	0.3451	0.2392	0.1356	0	0	0
Europe		Grain, mixed	Cereal Grains	3154318	1.75	5.52006	0.3451	0.2392	0.1356	1.90497	1.3204	0.74852
World		Grain, mixed	Cereal Grains	3349096	1.75	5.86092	0.3451	0.2392	0.1356	2.0226	1.40193	0.79474
South Asia	Afghanistan	Maize	Cereal Grains	106670	0.824333	0.0879316	0.3451	0.2392	0.1356	0.0303452	0.0210332	0.0119235
Latin America	Argentina	Maize	Cereal Grains	43462323	0.824333	35.8274	0.3451	0.2392	0.1356	12.3641	8.56992	4.8582
Central & West Asia	Armenia	Maize	Cereal Grains	7615	0.824333	0.0062773	0.3451	0.2392	0.1356	0.0021663	0.00150153	0.000851202
Central & West Asia	Azerbaijan	Maize	Cereal Grains	247939	0.824333	0.204384	0.3451	0.2392	0.1356	0.0705331	0.0488887	0.0277145
South Asia	Bangladesh	Maize	Cereal Grains	3288102	0.824333	2.71049	0.3451	0.2392	0.1356	0.935391	0.64835	0.367543
Latin America	Belize	Maize	Cereal Grains	77766	0.824333	0.0641051	0.3451	0.2392	0.1356	0.0221227	0.0153339	0.00869265
South Asia	Bhutan	Maize	Cereal Grains	92949	0.824333	0.076621	0.3451	0.2392	0.1356	0.0264419	0.0183277	0.0103898
Latin America	Bolivia (Plurinational State of)	Maize	Cereal Grains	1260926	0.824333	1.03942	0.3451	0.2392	0.1356	0.358705	0.24863	0.140946
Latin America	Brazil	Maize	Cereal Grains	82288298	0.824333	67.833	0.3451	0.2392	0.1356	23.4092	16.2257	9.19815
South East Asia	Cambodia	Maize	Cereal Grains	604333	0.824333	0.498172	0.3451	0.2392	0.1356	0.171919	0.119163	0.0675521
North America	Canada	Maize	Cereal Grains	13884800	0.824333	11.4457	0.3451	0.2392	0.1356	3.94991	2.73781	1.55204
Latin America	Chile	Maize	Cereal Grains	1110608	0.824333	0.915511	0.3451	0.2392	0.1356	0.315943	0.21899	0.124143
East Asia	China	Maize	Cereal Grains	257348659	0.824333	212.141	0.3451	0.2392	0.1356	73.2099	50.7441	28.7663
East Asia	Taiwan	Maize	Cereal Grains	174759	0.824333	0.14406	0.3451	0.2392	0.1356	0.049715	0.0344591	0.0195345
Latin America	Colombia	Maize	Cereal Grains	1388246	0.824333	1.14438	0.3451	0.2392	0.1356	0.394925	0.273735	0.155178
Latin America	Costa Rica	Maize	Cereal Grains	5358	0.824333	0.00441678	0.3451	0.2392	0.1356	0.00152423	0.00105649	0.000598915
East Asia	Democratic People's Republic of Korea	Maize	Cereal Grains	1876000	0.824333	1.54645	0.3451	0.2392	0.1356	0.53368	0.369911	0.209699
Latin America	Ecuador	Maize	Cereal Grains	1324147	0.824333	1.09154	0.3451	0.2392	0.1356	0.37669	0.261096	0.148013
Latin America	El Salvador	Maize	Cereal Grains	685509	0.824333	0.565088	0.3451	0.2392	0.1356	0.195012	0.135169	0.0766259
Latin America	French Guyana	Maize	Cereal Grains	417	0.824333	0.000343747	0.3451	0.2392	0.1356	0.000118627	8.22243e-05	4.66121e-05
Central & West Asia	Georgia	Maize	Cereal Grains	194200	0.824333	0.160086	0.3451	0.2392	0.1356	0.0552455	0.0382925	0.0217076
Latin America	Guatemala	Maize	Cereal Grains	1921936	0.824333	1.58432	0.3451	0.2392	0.1356	0.546747	0.378968	0.214833
Latin America	Guyana	Maize	Cereal Grains	4284	0.824333	0.00353144	0.3451	0.2392	0.1356	0.0012187	0.000844721	0.000478864
Latin America	Honduras	Maize	Cereal Grains	704747	0.824333	0.580946	0.3451	0.2392	0.1356	0.200485	0.138962	0.0787763
South Asia	India	Maize	Cereal Grains	27820000	0.824333	22.933	0.3451	0.2392	0.1356	7.91416	5.48556	3.10971
South East Asia	Indonesia	Maize	Cereal Grains	30253938	0.824333	24.9393	0.3451	0.2392	0.1356	8.60656	5.96549	3.38177
Central & West Asia	Iran	Maize	Cereal Grains	1338258	0.824333	1.10317	0.3451	0.2392	0.1356	0.380704	0.263878	0.14959
Central & West Asia	Iraq	Maize	Cereal Grains	209059	0.824333	0.172334	0.3451	0.2392	0.1356	0.0594726	0.0412224	0.0233685
Central & West Asia	Israel	Maize	Cereal Grains	81930	0.824333	0.0675376	0.3451	0.2392	0.1356	0.0233072	0.016155	0.0091581
East Asia	Japan	Maize	Cereal Grains	165	0.824333	0.000136015	0.3451	0.2392	0.1356	4.69388e-05	3.25348e-05	1.84436e-05
Central & West Asia	Jordan	Maize	Cereal Grains	21914	0.824333	0.0180644	0.3451	0.2392	0.1356	0.00623404	0.00432101	0.00244954
Central & West Asia	Kazakhstan	Maize	Cereal Grains	862094	0.824333	0.710653	0.3451	0.2392	0.1356	0.245246	0.169988	0.0963645
Central & West Asia	Kuwait	Maize	Cereal Grains	8869	0.824333	0.00731101	0.3451	0.2392	0.1356	0.00252303	0.00174879	0.000991373
Central & West Asia	Kyrgyzstan	Maize	Cereal Grains	692877	0.824333	0.571162	0.3451	0.2392	0.1356	0.197108	0.136622	0.0774495
South East Asia	Laos	Maize	Cereal Grains	981680	0.824333	0.809232	0.3451	0.2392	0.1356	0.279266	0.193568	0.109732
Central & West Asia	Lebanon	Maize	Cereal Grains	3288	0.824333	0.00271041	0.3451	0.2392	0.1356	0.000935362	0.00064833	0.000367531
South East Asia	Malaysia	Maize	Cereal Grains	76362	0.824333	0.0629477	0.3451	0.2392	0.1356	0.0217233	0.0150571	0.00853571
South Asia	Maldives	Maize	Cereal Grains	147	0.824333	0.000121177	0.3451	0.2392	0.1356	4.18182e-05	2.89855e-05	1.64316e-05
Latin America	Mexico	Maize	Cereal Grains	27169977	0.824333	22.3971	0.3451	0.2392	0.1356	7.72925	5.35739	3.03705
South East Asia	Myanmar	Maize	Cereal Grains	1983122	0.824333	1.63475	0.3451	0.2392	0.1356	0.564153	0.391033	0.221673
South Asia	Nepal	Maize	Cereal Grains	2473283	0.824333	2.03881	0.3451	0.2392	0.1356	0.703593	0.487683	0.276463
Latin America	Nicaragua	Maize	Cereal Grains	395226	0.824333	0.325798	0.3451	0.2392	0.1356	0.112433	0.0779309	0.0441782
Central & West Asia	Oman	Maize	Cereal Grains	8827	0.824333	0.00727639	0.3451	0.2392	0.1356	0.00251108	0.00174051	0.000986679
South Asia	Pakistan	Maize	Cereal Grains	6308897	0.824333	5.20063	0.3451	0.2392	0.1356	1.79474	1.24399	0.705206
Latin America	Panama	Maize	Cereal Grains	112446	0.824333	0.092693	0.3451	0.2392	0.1356	0.0319883	0.0221722	0.0125692
Latin America	Paraguay	Maize	Cereal Grains	5344650	0.824333	4.40577	0.3451	0.2392	0.1356	1.52043	1.05386	0.597423
Latin America	Peru	Maize	Cereal Grains	1569535	0.824333	1.29382	0.3451	0.2392	0.1356	0.446497	0.309482	0.175442
South East Asia	Philippines	Maize	Cereal Grains	7771919	0.824333	6.40665	0.3451	0.2392	0.1356	2.21094	1.53247	0.868742
Central & West Asia	Qatar	Maize	Cereal Grains	1866	0.824333	0.00153821	0.3451	0.2392	0.1356	0.000530835	0.000367939	0.000208581
East Asia	Republic of Korea	Maize	Cereal Grains	74368	0.824333	0.061304	0.3451	0.2392	0.1356	0.021156	0.0146639	0.00831283
Central & West Asia	Saudi Arabia	Maize	Cereal Grains	15394	0.824333	0.0126898	0.3451	0.2392	0.1356	0.00437925	0.0030354	0.00172074
South Asia	Sri Lanka	Maize	Cereal Grains	270041	0.824333	0.222604	0.3451	0.2392	0.1356	0.0768206	0.0532468	0.0301851
Latin America	Suriname	Maize	Cereal Grains	85	0.824333	7.00683e-05	0.3451	0.2392	0.1356	2.41806e-05	1.67603e-05	9.50127e-06
Central & West Asia	Syria	Maize	Cereal Grains	118000	0.824333	0.0972713	0.3451	0.2392	0.1356	0.0335683	0.0232673	0.01319
Central & West Asia	Tajikistan	Maize	Cereal Grains	237355	0.824333	0.19566	0.3451	0.2392	0.1356	0.0675221	0.0468018	0.0265314
South East Asia	Thailand	Maize	Cereal Grains	5004125	0.824333	4.12507	0.3451	0.2392	0.1356	1.42356	0.986716	0.559359
South East Asia	Timor-Leste	Maize	Cereal Grains	101564	0.824333	0.0837226	0.3451	0.2392	0.1356	0.0288927	0.0200264	0.0113528
Central & West Asia	Turkey	Maize	Cereal Grains	5700000	0.824333	4.6987	0.3451	0.2392	0.1356	1.62152	1.12393	0.637144
Central & West Asia	Turkmenistan	Maize	Cereal Grains	40000	0.824333	0.0329733	0.3451	0.2392	0.1356	0.0113791	0.00788722	0.00447118
Central & West Asia	United Arab Emirates	Maize	Cereal Grains	8942	0.824333	0.00737119	0.3451	0.2392	0.1356	0.0025438	0.00176319	0.000999533
North America	United States of America	Maize	Cereal Grains	392450840	0.824333	323.51	0.3451	0.2392	0.1356	111.643	77.3837	43.868
Latin America	Uruguay	Maize	Cereal Grains	816000	0.824333	0.672656	0.3451	0.2392	0.1356	0.232134	0.160899	0.0912122
Central & West Asia	Uzbekistan	Maize	Cereal Grains	413165	0.824333	0.340586	0.3451	0.2392	0.1356	0.117536	0.0814681	0.0461834
Latin America	Venezuela (Bolivarian Republic of)	Maize	Cereal Grains	1318418	0.824333	1.08682	0.3451	0.2392	0.1356	0.37506	0.259966	0.147372
South East Asia	Viet Nam	Maize	Cereal Grains	4874054	0.824333	4.01785	0.3451	0.2392	0.1356	1.38656	0.961069	0.54482
Central & West Asia	Yemen	Maize	Cereal Grains	42986	0.824333	0.0354348	0.3451	0.2392	0.1356	0.0122285	0.008476	0.00480496
Pacific		Maize	Cereal Grains	606026	0.824333	0.499567	0.3451	0.2392	0.1356	0.172401	0.119497	0.0677413
Europe		Maize	Cereal Grains	128595328	0.824333	106.005	0.3451	0.2392	0.1356	36.5825	25.3565	14.3743
Africa		Maize	Cereal Grains	78900876	0.824333	65.0406	0.3451	0.2392	0.1356	22.4455	15.5577	8.81951
Caribbean		Maize	Cereal Grains	658210	0.824333	0.542584	0.3451	0.2392	0.1356	0.187246	0.129786	0.0735745
World		Maize	Cereal Grains	1147621938	0.824333	946.023	0.3451	0.2392	0.1356	326.473	226.289	128.281
Latin America	Bolivia (Plurinational State of)	Maize, green	Cereal Grains	25215	0.824333	0.0207856	0.3451	0.2392	0.1356	0.0071731	0.00497191	0.00281852
South East Asia	Brunei	Maize, green	Cereal Grains	41	0.824333	3.37977e-05	0.3451	0.2392	0.1356	1.16636e-05	8.0844e-06	4.58296e-06
North America	Canada	Maize, green	Cereal Grains	190326	0.824333	0.156892	0.3451	0.2392	0.1356	0.0541435	0.0375286	0.0212746
Latin America	Chile	Maize, green	Cereal Grains	142848	0.824333	0.117754	0.3451	0.2392	0.1356	0.040637	0.0281668	0.0159675
East Asia	China	Maize, green	Cereal Grains	106884	0.824333	0.088108	0.3451	0.2392	0.1356	0.0304061	0.0210754	0.0119475
East Asia	Taiwan	Maize, green	Cereal Grains		0.824333	0	0.3451	0.2392	0.1356	0	0	0
Latin America	El Salvador	Maize, green	Cereal Grains	29393	0.824333	0.0242296	0.3451	0.2392	0.1356	0.00836165	0.00579573	0.00328554
South East Asia	Indonesia	Maize, green	Cereal Grains	590000	0.824333	0.486357	0.3451	0.2392	0.1356	0.167842	0.116337	0.06595
Central & West Asia	Israel	Maize, green	Cereal Grains	74929	0.824333	0.0617665	0.3451	0.2392	0.1356	0.0213156	0.0147745	0.00837553
East Asia	Japan	Maize, green	Cereal Grains	223884	0.824333	0.184555	0.3451	0.2392	0.1356	0.0636899	0.0441456	0.0250257
Central & West Asia	Kazakhstan	Maize, green	Cereal Grains	874	0.824333	0.000720467	0.3451	0.2392	0.1356	0.000248633	0.000172336	9.76954e-05
Latin America	Mexico	Maize, green	Cereal Grains	1058980	0.824333	0.872953	0.3451	0.2392	0.1356	0.301256	0.20881	0.118372
Central & West Asia	Palestine	Maize, green	Cereal Grains	8837	0.824333	0.00728463	0.3451	0.2392	0.1356	0.00251393	0.00174248	0.000987796
Latin America	Peru	Maize, green	Cereal Grains	434969	0.824333	0.358559	0.3451	0.2392	0.1356	0.123739	0.0857674	0.0486207
Central & West Asia	Qatar	Maize, green	Cereal Grains	1092	0.824333	0.000900172	0.3451	0.2392	0.1356	0.000310649	0.000215321	0.000122063
South East Asia	Thailand	Maize, green	Cereal Grains	304833	0.824333	0.251284	0.3451	0.2392	0.1356	0.0867181	0.0601071	0.0340741
North America	United States of America	Maize, green	Cereal Grains	3323910	0.824333	2.74001	0.3451	0.2392	0.1356	0.945577	0.65541	0.371545
Latin America	Uruguay	Maize, green	Cereal Grains	836	0.824333	0.000689143	0.3451	0.2392	0.1356	0.000237823	0.000164843	9.34477e-05
Pacific		Maize, green	Cereal Grains	414395	0.824333	0.3416	0.3451	0.2392	0.1356	0.117886	0.0817106	0.0463209
Europe		Maize, green	Cereal Grains	2821963	0.824333	2.32624	0.3451	0.2392	0.1356	0.802785	0.556436	0.315438
Africa		Maize, green	Cereal Grains	1760718	0.824333	1.45142	0.3451	0.2392	0.1356	0.500885	0.347179	0.196812
Caribbean		Maize, green	Cereal Grains	1891	0.824333	0.00155881	0.3451	0.2392	0.1356	0.000537947	0.000372868	0.000211375
World		Maize, green	Cereal Grains	11516818	0.824333	9.4937	0.3451	0.2392	0.1356	3.27627	2.27089	1.28735
South Asia	Afghanistan	Millet	Cereal Grains	11640	1.75	0.02037	0.3451	0.2392	0.1356	0.00702969	0.0048725	0.00276217
Latin America	Argentina	Millet	Cereal Grains	2254	1.75	0.0039445	0.3451	0.2392	0.1356	0.00136125	0.000943524	0.000534874
Central & West Asia	Azerbaijan	Millet	Cereal Grains	2792	1.75	0.004886	0.3451	0.2392	0.1356	0.00168616	0.00116873	0.000662542
South Asia	Bangladesh	Millet	Cereal Grains	12713	1.75	0.0222478	0.3451	0.2392	0.1356	0.0076777	0.00532166	0.00301679
South Asia	Bhutan	Millet	Cereal Grains	1755	1.75	0.00307125	0.3451	0.2392	0.1356	0.00105989	0.000734643	0.000416462
East Asia	China	Millet	Cereal Grains	1566363	1.75	2.74114	0.3451	0.2392	0.1356	0.945966	0.65568	0.371698
East Asia	Taiwan	Millet	Cereal Grains	398	1.75	0.0006965	0.3451	0.2392	0.1356	0.000240362	0.000166603	9.44454e-05
East Asia	Democratic People's Republic of Korea	Millet	Cereal Grains	78486	1.75	0.13735	0.3451	0.2392	0.1356	0.0473997	0.0328542	0.0186247
South Asia	India	Millet	Cereal Grains	11640000	1.75	20.37	0.3451	0.2392	0.1356	7.02969	4.8725	2.76217
Central & West Asia	Iran	Millet	Cereal Grains	17573	1.75	0.0307527	0.3451	0.2392	0.1356	0.0106128	0.00735606	0.00417007
Central & West Asia	Iraq	Millet	Cereal Grains	4130	1.75	0.0072275	0.3451	0.2392	0.1356	0.00249421	0.00172882	0.000980049
East Asia	Japan	Millet	Cereal Grains	203	1.75	0.00035525	0.3451	0.2392	0.1356	0.000122597	8.49758e-05	4.81719e-05
Central & West Asia	Jordan	Millet	Cereal Grains	10	1.75	1.75e-05	0.3451	0.2392	0.1356	6.03925e-06	4.186e-06	2.373e-06
Central & West Asia	Kazakhstan	Millet	Cereal Grains	40237	1.75	0.0704147	0.3451	0.2392	0.1356	0.0243001	0.0168432	0.00954824
Central & West Asia	Kyrgyzstan	Millet	Cereal Grains	86	1.75	0.0001505	0.3451	0.2392	0.1356	5.19376e-05	3.59996e-05	2.04078e-05
South Asia	Maldives	Millet	Cereal Grains	4	1.75	7e-06	0.3451	0.2392	0.1356	2.4157e-06	1.6744e-06	9.492e-07
Latin America	Mexico	Millet	Cereal Grains	221	1.75	0.00038675	0.3451	0.2392	0.1356	0.000133467	9.25106e-05	5.24433e-05
South East Asia	Myanmar	Millet	Cereal Grains	247895	1.75	0.433816	0.3451	0.2392	0.1356	0.14971	0.103769	0.0588255
South Asia	Nepal	Millet	Cereal Grains	313987	1.75	0.549477	0.3451	0.2392	0.1356	0.189625	0.131435	0.0745091
South Asia	Pakistan	Millet	Cereal Grains	350010	1.75	0.612518	0.3451	0.2392	0.1356	0.21138	0.146514	0.0830574
East Asia	Republic of Korea	Millet	Cereal Grains	1608	1.75	0.002814	0.3451	0.2392	0.1356	0.000971111	0.000673109	0.000381578
Central & West Asia	Saudi Arabia	Millet	Cereal Grains	8320	1.75	0.01456	0.3451	0.2392	0.1356	0.00502466	0.00348275	0.00197434
South Asia	Sri Lanka	Millet	Cereal Grains	8060	1.75	0.014105	0.3451	0.2392	0.1356	0.00486764	0.00337392	0.00191264
Central & West Asia	Syria	Millet	Cereal Grains	3477	1.75	0.00608475	0.3451	0.2392	0.1356	0.00209985	0.00145547	0.000825092
Central & West Asia	Tajikistan	Millet	Cereal Grains	78	1.75	0.0001365	0.3451	0.2392	0.1356	4.71062e-05	3.26508e-05	1.85094e-05
Central & West Asia	Turkey	Millet	Cereal Grains	4397	1.75	0.00769475	0.3451	0.2392	0.1356	0.00265546	0.00184058	0.00104341
Central & West Asia	Turkmenistan	Millet	Cereal Grains		1.75	0	0.3451	0.2392	0.1356	0	0	0
North America	United States of America	Millet	Cereal Grains	326340	1.75	0.571095	0.3451	0.2392	0.1356	0.197085	0.136606	0.0774405
Central & West Asia	Uzbekistan	Millet	Cereal Grains	6289	1.75	0.0110057	0.3451	0.2392	0.1356	0.00379808	0.00263258	0.00149238
South East Asia	Viet Nam	Millet	Cereal Grains	3370	1.75	0.0058975	0.3451	0.2392	0.1356	0.00203523	0.00141068	0.000799701
Central & West Asia	Yemen	Millet	Cereal Grains	57836	1.75	0.101213	0.3451	0.2392	0.1356	0.0349286	0.0242101	0.0137245
Pacific		Millet	Cereal Grains	35922	1.75	0.0628635	0.3451	0.2392	0.1356	0.0216942	0.0150369	0.00852429
Europe		Millet	Cereal Grains	405530	1.75	0.709677	0.3451	0.2392	0.1356	0.24491	0.169755	0.0962323
Africa		Millet	Cereal Grains	15867785	1.75	27.7686	0.3451	0.2392	0.1356	9.58295	6.64225	3.76543
Caribbean		Millet	Cereal Grains		1.75	0	0.3451	0.2392	0.1356	0	0	0
World		Millet	Cereal Grains	31019370	1.75	54.2839	0.3451	0.2392	0.1356	18.7334	12.9847	7.3609
Latin America	Argentina	Oats	Cereal Grains	491713	1.75	0.860498	0.3451	0.2392	0.1356	0.296958	0.205831	0.116683
Central & West Asia	Armenia	Oats	Cereal Grains	4899	1.75	0.00857325	0.3451	0.2392	0.1356	0.00295863	0.00205072	0.00116253
Central & West Asia	Azerbaijan	Oats	Cereal Grains	10516	1.75	0.018403	0.3451	0.2392	0.1356	0.00635088	0.004402	0.00249545
South Asia	Bhutan	Oats	Cereal Grains		1.75	0	0.3451	0.2392	0.1356	0	0	0
Latin America	Bolivia (Plurinational State of)	Oats	Cereal Grains	21906	1.75	0.0383355	0.3451	0.2392	0.1356	0.0132296	0.00916985	0.00519829
Latin America	Brazil	Oats	Cereal Grains	897805	1.75	1.57116	0.3451	0.2392	0.1356	0.542207	0.375821	0.213049
North America	Canada	Oats	Cereal Grains	3436000	1.75	6.013	0.3451	0.2392	0.1356	2.07509	1.43831	0.815363
Latin America	Chile	Oats	Cereal Grains	571471	1.75	1.00007	0.3451	0.2392	0.1356	0.345126	0.239218	0.13561
East Asia	China	Oats	Cereal Grains	1004592	1.75	1.75804	0.3451	0.2392	0.1356	0.606698	0.420522	0.23839
Latin America	Colombia	Oats	Cereal Grains	4745	1.75	0.00830375	0.3451	0.2392	0.1356	0.00286562	0.00198626	0.00112599
East Asia	Democratic People's Republic of Korea	Oats	Cereal Grains	11267	1.75	0.0197172	0.3451	0.2392	0.1356	0.00680442	0.00471637	0.00267366
Latin America	Ecuador	Oats	Cereal Grains	884	1.75	0.001547	0.3451	0.2392	0.1356	0.00053387	0.000370042	0.000209773
Central & West Asia	Georgia	Oats	Cereal Grains	4700	1.75	0.008225	0.3451	0.2392	0.1356	0.00283845	0.00196742	0.00111531
Central & West Asia	Iraq	Oats	Cereal Grains	441	1.75	0.00077175	0.3451	0.2392	0.1356	0.000266331	0.000184603	0.000104649
Central & West Asia	Israel	Oats	Cereal Grains	217	1.75	0.00037975	0.3451	0.2392	0.1356	0.000131052	9.08362e-05	5.14941e-05
East Asia	Japan	Oats	Cereal Grains	278	1.75	0.0004865	0.3451	0.2392	0.1356	0.000167891	0.000116371	6.59694e-05
Central & West Asia	Kazakhstan	Oats	Cereal Grains	336129	1.75	0.588226	0.3451	0.2392	0.1356	0.202997	0.140704	0.0797634
Central & West Asia	Kuwait	Oats	Cereal Grains		1.75	0	0.3451	0.2392	0.1356	0	0	0
Central & West Asia	Kyrgyzstan	Oats	Cereal Grains	2638	1.75	0.0046165	0.3451	0.2392	0.1356	0.00159315	0.00110427	0.000625997
Central & West Asia	Lebanon	Oats	Cereal Grains	139	1.75	0.00024325	0.3451	0.2392	0.1356	8.39456e-05	5.81854e-05	3.29847e-05
Latin America	Mexico	Oats	Cereal Grains	99305	1.75	0.173784	0.3451	0.2392	0.1356	0.0599728	0.0415691	0.0235651
East Asia	Mongolia	Oats	Cereal Grains	9972	1.75	0.017451	0.3451	0.2392	0.1356	0.00602234	0.00417428	0.00236636
Latin America	Peru	Oats	Cereal Grains	20243	1.75	0.0354252	0.3451	0.2392	0.1356	0.0122253	0.00847372	0.00480366
Central & West Asia	Syria	Oats	Cereal Grains	10	1.75	1.75e-05	0.3451	0.2392	0.1356	6.03925e-06	4.186e-06	2.373e-06
Central & West Asia	Tajikistan	Oats	Cereal Grains	2692	1.75	0.004711	0.3451	0.2392	0.1356	0.00162577	0.00112687	0.000638812
Central & West Asia	Turkey	Oats	Cereal Grains	260000	1.75	0.455	0.3451	0.2392	0.1356	0.157021	0.108836	0.061698
Central & West Asia	Turkmenistan	Oats	Cereal Grains		1.75	0	0.3451	0.2392	0.1356	0	0	0
North America	United States of America	Oats	Cereal Grains	814720	1.75	1.42576	0.3451	0.2392	0.1356	0.49203	0.341042	0.193333
Latin America	Uruguay	Oats	Cereal Grains	52700	1.75	0.092225	0.3451	0.2392	0.1356	0.0318268	0.0220602	0.0125057
Central & West Asia	Uzbekistan	Oats	Cereal Grains		1.75	0	0.3451	0.2392	0.1356	0	0	0
Pacific		Oats	Cereal Grains	1252123	1.75	2.19122	0.3451	0.2392	0.1356	0.756188	0.524139	0.297129
Europe		Oats	Cereal Grains	13515754	1.75	23.6526	0.3451	0.2392	0.1356	8.1625	5.65769	3.20729
Africa		Oats	Cereal Grains	222853	1.75	0.389993	0.3451	0.2392	0.1356	0.134586	0.0932863	0.052883
World		Oats	Cereal Grains	23051204	1.75	40.3396	0.3451	0.2392	0.1356	13.9212	9.64923	5.47005
South Asia	Afghanistan	Rice, paddy	Cereal Grains	352177	1.012	0.356403	0.3451	0.2392	0.1356	0.122995	0.0852516	0.0483283
Latin America	Argentina	Rice, paddy	Cereal Grains	1367968	1.012	1.38438	0.3451	0.2392	0.1356	0.477751	0.331145	0.187722
Central & West Asia	Armenia	Rice, paddy	Cereal Grains		1.012	0	0.3451	0.2392	0.1356	0	0	0
Central & West Asia	Azerbaijan	Rice, paddy	Cereal Grains	11975	1.012	0.0121187	0.3451	0.2392	0.1356	0.00418216	0.00289879	0.0016433
South Asia	Bangladesh	Rice, paddy	Cereal Grains	56417319	1.012	57.0943	0.3451	0.2392	0.1356	19.7033	13.657	7.74199
Latin America	Belize	Rice, paddy	Cereal Grains	13375	1.012	0.0135355	0.3451	0.2392	0.1356	0.0046711	0.00323769	0.00183541
South Asia	Bhutan	Rice, paddy	Cereal Grains	88753	1.012	0.089818	0.3451	0.2392	0.1356	0.0309962	0.0214845	0.0121793
Latin America	Bolivia (Plurinational State of)	Rice, paddy	Cereal Grains	541157	1.012	0.547651	0.3451	0.2392	0.1356	0.188994	0.130998	0.0742615
Latin America	Brazil	Rice, paddy	Cereal Grains	11749192	1.012	11.8902	0.3451	0.2392	0.1356	4.1033	2.84413	1.61231
South East Asia	Brunei	Rice, paddy	Cereal Grains	1569	1.012	0.00158783	0.3451	0.2392	0.1356	0.000547959	0.000379808	0.000215309
South East Asia	Cambodia	Rice, paddy	Cereal Grains	10647212	1.012	10.775	0.3451	0.2392	0.1356	3.71845	2.57737	1.46109
Latin America	Chile	Rice, paddy	Cereal Grains	192808	1.012	0.195122	0.3451	0.2392	0.1356	0.0673365	0.0466731	0.0264585
East Asia	China	Rice, paddy	Cereal Grains	214078796	1.012	216.648	0.3451	0.2392	0.1356	74.7651	51.8221	29.3774
East Asia	Hong Kong	Rice, paddy	Cereal Grains	0	1.012	0	0.3451	0.2392	0.1356	0	0	0
East Asia	Taiwan	Rice, paddy	Cereal Grains	1949796	1.012	1.97319	0.3451	0.2392	0.1356	0.680949	0.471988	0.267565
Latin America	Colombia	Rice, paddy	Cereal Grains	3322937	1.012	3.36281	0.3451	0.2392	0.1356	1.16051	0.804385	0.455997
Latin America	Costa Rica	Rice, paddy	Cereal Grains	158311	1.012	0.160211	0.3451	0.2392	0.1356	0.0552887	0.0383224	0.0217246
East Asia	Democratic People's Republic of Korea	Rice, paddy	Cereal Grains	2088000	1.012	2.11306	0.3451	0.2392	0.1356	0.729216	0.505443	0.28653
Latin America	Ecuador	Rice, paddy	Cereal Grains	1350093	1.012	1.36629	0.3451	0.2392	0.1356	0.471508	0.326818	0.185269
Latin America	El Salvador	Rice, paddy	Cereal Grains	22764	1.012	0.0230372	0.3451	0.2392	0.1356	0.00795013	0.00551049	0.00312384
Latin America	French Guyana	Rice, paddy	Cereal Grains	2853	1.012	0.00288724	0.3451	0.2392	0.1356	0.000996385	0.000690627	0.000391509
Latin America	Guatemala	Rice, paddy	Cereal Grains	31498	1.012	0.031876	0.3451	0.2392	0.1356	0.0110004	0.00762473	0.00432238
Latin America	Guyana	Rice, paddy	Cereal Grains	964472	1.012	0.976046	0.3451	0.2392	0.1356	0.336833	0.23347	0.132352
Latin America	Honduras	Rice, paddy	Cereal Grains	59698	1.012	0.0604144	0.3451	0.2392	0.1356	0.020849	0.0144511	0.00819219
South Asia	India	Rice, paddy	Cereal Grains	172580000	1.012	174.651	0.3451	0.2392	0.1356	60.272	41.7765	23.6827
South East Asia	Indonesia	Rice, paddy	Cereal Grains	83037000	1.012	84.0334	0.3451	0.2392	0.1356	28.9999	20.1008	11.3949
Central & West Asia	Iran	Rice, paddy	Cereal Grains	1990000	1.012	2.01388	0.3451	0.2392	0.1356	0.69499	0.48172	0.273082
Central & West Asia	Iraq	Rice, paddy	Cereal Grains	274788	1.012	0.278085	0.3451	0.2392	0.1356	0.0959673	0.066518	0.0377084
East Asia	Japan	Rice, paddy	Cereal Grains	9727500	1.012	9.84423	0.3451	0.2392	0.1356	3.39724	2.35474	1.33488
Central & West Asia	Kazakhstan	Rice, paddy	Cereal Grains	482945	1.012	0.48874	0.3451	0.2392	0.1356	0.168664	0.116907	0.0662732
Central & West Asia	Kyrgyzstan	Rice, paddy	Cereal Grains	40783	1.012	0.0412724	0.3451	0.2392	0.1356	0.0142431	0.00987236	0.00559654
South East Asia	Laos	Rice, paddy	Cereal Grains	3584700	1.012	3.62772	0.3451	0.2392	0.1356	1.25192	0.86775	0.491918
South East Asia	Malaysia	Rice, paddy	Cereal Grains	2718987	1.012	2.75161	0.3451	0.2392	0.1356	0.949582	0.658186	0.373119
Latin America	Mexico	Rice, paddy	Cereal Grains	283763	1.012	0.287168	0.3451	0.2392	0.1356	0.0991017	0.0686906	0.03894
South East Asia	Myanmar	Rice, paddy	Cereal Grains	25418142	1.012	25.7232	0.3451	0.2392	0.1356	8.87706	6.15298	3.48806
South Asia	Nepal	Rice, paddy	Cereal Grains	5151925	1.012	5.21375	0.3451	0.2392	0.1356	1.79926	1.24713	0.706984
Latin America	Nicaragua	Rice, paddy	Cereal Grains	365000	1.012	0.36938	0.3451	0.2392	0.1356	0.127473	0.0883557	0.0500879
South Asia	Pakistan	Rice, paddy	Cereal Grains	10802949	1.012	10.9326	0.3451	0.2392	0.1356	3.77283	2.61507	1.48246
Latin America	Panama	Rice, paddy	Cereal Grains	314946	1.012	0.318725	0.3451	0.2392	0.1356	0.109992	0.0762391	0.0432192
Latin America	Paraguay	Rice, paddy	Cereal Grains	894600	1.012	0.905335	0.3451	0.2392	0.1356	0.312431	0.216556	0.122763
Latin America	Peru	Rice, paddy	Cereal Grains	3557900	1.012	3.60059	0.3451	0.2392	0.1356	1.24257	0.861262	0.488241
South East Asia	Philippines	Rice, paddy	Cereal Grains	19066094	1.012	19.2949	0.3451	0.2392	0.1356	6.65867	4.61534	2.61639
East Asia	Republic of Korea	Rice, paddy	Cereal Grains	5195437	1.012	5.25778	0.3451	0.2392	0.1356	1.81446	1.25766	0.712955
Central & West Asia	Saudi Arabia	Rice, paddy	Cereal Grains	0	1.012	0	0.3451	0.2392	0.1356	0	0	0
South Asia	Sri Lanka	Rice, paddy	Cereal Grains	3929831	1.012	3.97699	0.3451	0.2392	0.1356	1.37246	0.951296	0.53928
Latin America	Suriname	Rice, paddy	Cereal Grains	273916	1.012	0.277203	0.3451	0.2392	0.1356	0.0956628	0.066307	0.0375887
Central & West Asia	Syria	Rice, paddy	Cereal Grains	0	1.012	0	0.3451	0.2392	0.1356	0	0	0
Central & West Asia	Tajikistan	Rice, paddy	Cereal Grains	90446	1.012	0.0915314	0.3451	0.2392	0.1356	0.0315875	0.0218943	0.0124117
South East Asia	Thailand	Rice, paddy	Cereal Grains	32192087	1.012	32.5784	0.3451	0.2392	0.1356	11.2428	7.79275	4.41763
South East Asia	Timor-Leste	Rice, paddy	Cereal Grains	86647	1.012	0.0876868	0.3451	0.2392	0.1356	0.0302607	0.0209747	0.0118903
Central & West Asia	Turkey	Rice, paddy	Cereal Grains	940000	1.012	0.95128	0.3451	0.2392	0.1356	0.328287	0.227546	0.128994
Central & West Asia	Turkmenistan	Rice, paddy	Cereal Grains	130000	1.012	0.13156	0.3451	0.2392	0.1356	0.0454014	0.0314692	0.0178395
North America	United States of America	Rice, paddy	Cereal Grains	10170040	1.012	10.2921	0.3451	0.2392	0.1356	3.5518	2.46187	1.39561
Latin America	Uruguay	Rice, paddy	Cereal Grains	1360000	1.012	1.37632	0.3451	0.2392	0.1356	0.474968	0.329216	0.186629
Central & West Asia	Uzbekistan	Rice, paddy	Cereal Grains	221089	1.012	0.223742	0.3451	0.2392	0.1356	0.0772134	0.0535191	0.0303394
Latin America	Venezuela (Bolivarian Republic of)	Rice, paddy	Cereal Grains	494549	1.012	0.500484	0.3451	0.2392	0.1356	0.172717	0.119716	0.0678656
South East Asia	Viet Nam	Rice, paddy	Cereal Grains	44046250	1.012	44.5748	0.3451	0.2392	0.1356	15.3828	10.6623	6.04434
Pacific		Rice, paddy	Cereal Grains	#VALUE!	1.012	#VALUE!	0.3451	0.2392	0.1356	#VALUE!	#VALUE!	#VALUE!
Europe		Rice, paddy	Cereal Grains	4022957	1.012	4.07123	0.3451	0.2392	0.1356	1.40498	0.973839	0.552059
Africa		Rice, paddy	Cereal Grains	33174017	1.012	33.5721	0.3451	0.2392	0.1356	11.5857	8.03045	4.55238
Caribbean		Rice, paddy	Cereal Grains	1272004	1.012	1.28727	0.3451	0.2392	0.1356	0.444236	0.307915	0.174554
World		Rice, paddy	Cereal Grains	782000147	1.012	791.384	0.3451	0.2392	0.1356	273.107	189.299	107.312
South Asia	Afghanistan	Rice, paddy (rice milled equivalent)	Cereal Grains	234902	1.012	0.237721	0.3451	0.2392	0.1356	0.0820375	0.0568628	0.0322349
Latin America	Argentina	Rice, paddy (rice milled equivalent)	Cereal Grains	912435	1.012	0.923384	0.3451	0.2392	0.1356	0.31866	0.220874	0.125211
Central & West Asia	Armenia	Rice, paddy (rice milled equivalent)	Cereal Grains		1.012	0	0.3451	0.2392	0.1356	0	0	0
Central & West Asia	Azerbaijan	Rice, paddy (rice milled equivalent)	Cereal Grains	7987	1.012	0.00808284	0.3451	0.2392	0.1356	0.00278939	0.00193342	0.00109603
South Asia	Bangladesh	Rice, paddy (rice milled equivalent)	Cereal Grains	37630352	1.012	38.0819	0.3451	0.2392	0.1356	13.1421	9.10919	5.16391
Latin America	Belize	Rice, paddy (rice milled equivalent)	Cereal Grains	8921	1.012	0.00902805	0.3451	0.2392	0.1356	0.00311558	0.00215951	0.0012242
South Asia	Bhutan	Rice, paddy (rice milled equivalent)	Cereal Grains	59199	1.012	0.0599094	0.3451	0.2392	0.1356	0.0206747	0.0143303	0.00812371
Latin America	Bolivia (Plurinational State of)	Rice, paddy (rice milled equivalent)	Cereal Grains	360952	1.012	0.365283	0.3451	0.2392	0.1356	0.126059	0.0873758	0.0495324
Latin America	Brazil	Rice, paddy (rice milled equivalent)	Cereal Grains	7836711	1.012	7.93075	0.3451	0.2392	0.1356	2.7369	1.89704	1.07541
South East Asia	Brunei	Rice, paddy (rice milled equivalent)	Cereal Grains	1047	1.012	0.00105956	0.3451	0.2392	0.1356	0.000365656	0.000253448	0.000143677
South East Asia	Cambodia	Rice, paddy (rice milled equivalent)	Cereal Grains	7101691	1.012	7.18691	0.3451	0.2392	0.1356	2.4802	1.71911	0.974545
Latin America	Chile	Rice, paddy (rice milled equivalent)	Cereal Grains	128603	1.012	0.130146	0.3451	0.2392	0.1356	0.0449135	0.031131	0.0176478
East Asia	China	Rice, paddy (rice milled equivalent)	Cereal Grains	142790557	1.012	144.504	0.3451	0.2392	0.1356	49.8683	34.5654	19.5947
East Asia	Hong Kong	Rice, paddy (rice milled equivalent)	Cereal Grains	0	1.012	0	0.3451	0.2392	0.1356	0	0	0
East Asia	Taiwan	Rice, paddy (rice milled equivalent)	Cereal Grains	1300514	1.012	1.31612	0.3451	0.2392	0.1356	0.454193	0.314816	0.178466
Latin America	Colombia	Rice, paddy (rice milled equivalent)	Cereal Grains	2216399	1.012	2.243	0.3451	0.2392	0.1356	0.774058	0.536525	0.30415
Latin America	Costa Rica	Rice, paddy (rice milled equivalent)	Cereal Grains	105593	1.012	0.10686	0.3451	0.2392	0.1356	0.0368774	0.0255609	0.0144902
East Asia	Democratic People's Republic of Korea	Rice, paddy (rice milled equivalent)	Cereal Grains	1392696	1.012	1.40941	0.3451	0.2392	0.1356	0.486387	0.33713	0.191116
Latin America	Ecuador	Rice, paddy (rice milled equivalent)	Cereal Grains	900512	1.012	0.911318	0.3451	0.2392	0.1356	0.314496	0.217987	0.123575
Latin America	El Salvador	Rice, paddy (rice milled equivalent)	Cereal Grains	15183	1.012	0.0153652	0.3451	0.2392	0.1356	0.00530253	0.00367535	0.00208352
Latin America	French Guyana	Rice, paddy (rice milled equivalent)	Cereal Grains	1903	1.012	0.00192584	0.3451	0.2392	0.1356	0.000664606	0.00046066	0.000261143
Latin America	Guatemala	Rice, paddy (rice milled equivalent)	Cereal Grains	21009	1.012	0.0212611	0.3451	0.2392	0.1356	0.00733721	0.00508566	0.00288301
Latin America	Guyana	Rice, paddy (rice milled equivalent)	Cereal Grains	643303	1.012	0.651023	0.3451	0.2392	0.1356	0.224668	0.155725	0.0882787
Latin America	Honduras	Rice, paddy (rice milled equivalent)	Cereal Grains	39819	1.012	0.0402968	0.3451	0.2392	0.1356	0.0139064	0.009639	0.00546425
South Asia	India	Rice, paddy (rice milled equivalent)	Cereal Grains	115110860	1.012	116.492	0.3451	0.2392	0.1356	40.2015	27.8649	15.7963
South East Asia	Indonesia	Rice, paddy (rice milled equivalent)	Cereal Grains	55385679	1.012	56.0503	0.3451	0.2392	0.1356	19.343	13.4072	7.60042
Central & West Asia	Iran	Rice, paddy (rice milled equivalent)	Cereal Grains	1327330	1.012	1.34326	0.3451	0.2392	0.1356	0.463558	0.321307	0.182146
Central & West Asia	Iraq	Rice, paddy (rice milled equivalent)	Cereal Grains	183284	1.012	0.185483	0.3451	0.2392	0.1356	0.0640103	0.0443676	0.0251516
East Asia	Japan	Rice, paddy (rice milled equivalent)	Cereal Grains	6488243	1.012	6.5661	0.3451	0.2392	0.1356	2.26596	1.57061	0.890363
Central & West Asia	Kazakhstan	Rice, paddy (rice milled equivalent)	Cereal Grains	322124	1.012	0.325989	0.3451	0.2392	0.1356	0.112499	0.0779767	0.0442042
Central & West Asia	Kyrgyzstan	Rice, paddy (rice milled equivalent)	Cereal Grains	27202	1.012	0.0275284	0.3451	0.2392	0.1356	0.00950006	0.0065848	0.00373285
South East Asia	Laos	Rice, paddy (rice milled equivalent)	Cereal Grains	2390995	1.012	2.41969	0.3451	0.2392	0.1356	0.835034	0.578789	0.32811
South East Asia	Malaysia	Rice, paddy (rice milled equivalent)	Cereal Grains	1813564	1.012	1.83533	0.3451	0.2392	0.1356	0.633371	0.43901	0.24887
Latin America	Mexico	Rice, paddy (rice milled equivalent)	Cereal Grains	189270	1.012	0.191541	0.3451	0.2392	0.1356	0.0661009	0.0458167	0.025973
South East Asia	Myanmar	Rice, paddy (rice milled equivalent)	Cereal Grains	16953901	1.012	17.1573	0.3451	0.2392	0.1356	5.921	4.10404	2.32654
South Asia	Nepal	Rice, paddy (rice milled equivalent)	Cereal Grains	3436334	1.012	3.47757	0.3451	0.2392	0.1356	1.20011	0.831835	0.471558
Latin America	Nicaragua	Rice, paddy (rice milled equivalent)	Cereal Grains	243455	1.012	0.246376	0.3451	0.2392	0.1356	0.0850245	0.0589332	0.0334086
South Asia	Pakistan	Rice, paddy (rice milled equivalent)	Cereal Grains	7205567	1.012	7.29203	0.3451	0.2392	0.1356	2.51648	1.74425	0.9888
Latin America	Panama	Rice, paddy (rice milled equivalent)	Cereal Grains	210069	1.012	0.21259	0.3451	0.2392	0.1356	0.0733647	0.0508515	0.0288272
Latin America	Paraguay	Rice, paddy (rice milled equivalent)	Cereal Grains	596698	1.012	0.603858	0.3451	0.2392	0.1356	0.208392	0.144443	0.0818832
Latin America	Peru	Rice, paddy (rice milled equivalent)	Cereal Grains	2373119	1.012	2.4016	0.3451	0.2392	0.1356	0.828791	0.574462	0.325656
South East Asia	Philippines	Rice, paddy (rice milled equivalent)	Cereal Grains	12717085	1.012	12.8697	0.3451	0.2392	0.1356	4.44133	3.07843	1.74513
East Asia	Republic of Korea	Rice, paddy (rice milled equivalent)	Cereal Grains	3465356	1.012	3.50694	0.3451	0.2392	0.1356	1.21025	0.83886	0.475541
Central & West Asia	Saudi Arabia	Rice, paddy (rice milled equivalent)	Cereal Grains	0	1.012	0	0.3451	0.2392	0.1356	0	0	0
South Asia	Sri Lanka	Rice, paddy (rice milled equivalent)	Cereal Grains	2621197	1.012	2.65265	0.3451	0.2392	0.1356	0.91543	0.634514	0.3597
Latin America	Suriname	Rice, paddy (rice milled equivalent)	Cereal Grains	182702	1.012	0.184894	0.3451	0.2392	0.1356	0.0638071	0.0442267	0.0250717
Central & West Asia	Syria	Rice, paddy (rice milled equivalent)	Cereal Grains	0	1.012	0	0.3451	0.2392	0.1356	0	0	0
Central & West Asia	Tajikistan	Rice, paddy (rice milled equivalent)	Cereal Grains	60327	1.012	0.0610509	0.3451	0.2392	0.1356	0.0210687	0.0146034	0.00827851
South East Asia	Thailand	Rice, paddy (rice milled equivalent)	Cereal Grains	21472122	1.012	21.7298	0.3451	0.2392	0.1356	7.49895	5.19777	2.94656
South East Asia	Timor-Leste	Rice, paddy (rice milled equivalent)	Cereal Grains	57794	1.012	0.0584875	0.3451	0.2392	0.1356	0.020184	0.0139902	0.00793091
Central & West Asia	Turkey	Rice, paddy (rice milled equivalent)	Cereal Grains	626980	1.012	0.634504	0.3451	0.2392	0.1356	0.218967	0.151773	0.0860387
Central & West Asia	Turkmenistan	Rice, paddy (rice milled equivalent)	Cereal Grains	86710	1.012	0.0877505	0.3451	0.2392	0.1356	0.0302827	0.0209899	0.011899
North America	United States of America	Rice, paddy (rice milled equivalent)	Cereal Grains	6783417	1.012	6.86482	0.3451	0.2392	0.1356	2.36905	1.64206	0.930869
Latin America	Uruguay	Rice, paddy (rice milled equivalent)	Cereal Grains	907120	1.012	0.918005	0.3451	0.2392	0.1356	0.316804	0.219587	0.124482
Central & West Asia	Uzbekistan	Rice, paddy (rice milled equivalent)	Cereal Grains	147466	1.012	0.149236	0.3451	0.2392	0.1356	0.0515012	0.0356972	0.0202363
Latin America	Venezuela (Bolivarian Republic of)	Rice, paddy (rice milled equivalent)	Cereal Grains	329864	1.012	0.333822	0.3451	0.2392	0.1356	0.115202	0.0798503	0.0452663
South East Asia	Viet Nam	Rice, paddy (rice milled equivalent)	Cereal Grains	29378848	1.012	29.7314	0.3451	0.2392	0.1356	10.2603	7.11175	4.03158
Pacific		Rice, paddy (rice milled equivalent)	Cereal Grains	#VALUE!	1.012	#VALUE!	0.3451	0.2392	0.1356	#VALUE!	#VALUE!	#VALUE!
Europe		Rice, paddy (rice milled equivalent)	Cereal Grains	2683312	1.012	2.71551	0.3451	0.2392	0.1356	0.937123	0.64955	0.368223
Africa		Rice, paddy (rice milled equivalent)	Cereal Grains	22127069	1.012	22.3926	0.3451	0.2392	0.1356	7.72768	5.35631	3.03644
Caribbean		Rice, paddy (rice milled equivalent)	Cereal Grains	848427	1.012	0.858608	0.3451	0.2392	0.1356	0.296306	0.205379	0.116427
World		Rice, paddy (rice milled equivalent)	Cereal Grains	521594098	1.012	527.853	0.3451	0.2392	0.1356	182.162	126.262	71.5769
Latin America	Argentina	Rye	Cereal Grains	86098	1.75	0.150672	0.3451	0.2392	0.1356	0.0519967	0.0360406	0.0204311
Central & West Asia	Armenia	Rye	Cereal Grains	842	1.75	0.0014735	0.3451	0.2392	0.1356	0.000508505	0.000352461	0.000199807
Central & West Asia	Azerbaijan	Rye	Cereal Grains	680	1.75	0.00119	0.3451	0.2392	0.1356	0.000410669	0.000284648	0.000161364
Latin America	Bolivia (Plurinational State of)	Rye	Cereal Grains	275	1.75	0.00048125	0.3451	0.2392	0.1356	0.000166079	0.000115115	6.52575e-05
Latin America	Brazil	Rye	Cereal Grains	8297	1.75	0.0145197	0.3451	0.2392	0.1356	0.00501077	0.00347312	0.00196888
North America	Canada	Rye	Cereal Grains	236400	1.75	0.4137	0.3451	0.2392	0.1356	0.142768	0.098957	0.0560977
Latin America	Chile	Rye	Cereal Grains	4300	1.75	0.007525	0.3451	0.2392	0.1356	0.00259688	0.00179998	0.00102039
East Asia	China	Rye	Cereal Grains	1044776	1.75	1.82836	0.3451	0.2392	0.1356	0.630966	0.437343	0.247925
East Asia	Democratic People's Republic of Korea	Rye	Cereal Grains	65250	1.75	0.114187	0.3451	0.2392	0.1356	0.0394061	0.0273136	0.0154838
Latin America	Ecuador	Rye	Cereal Grains	79	1.75	0.00013825	0.3451	0.2392	0.1356	4.77101e-05	3.30694e-05	1.87467e-05
Central & West Asia	Georgia	Rye	Cereal Grains	95	1.75	0.00016625	0.3451	0.2392	0.1356	5.73729e-05	3.9767e-05	2.25435e-05
Central & West Asia	Iran	Rye	Cereal Grains	457	1.75	0.00079975	0.3451	0.2392	0.1356	0.000275994	0.0001913	0.000108446
East Asia	Japan	Rye	Cereal Grains		1.75	0	0.3451	0.2392	0.1356	0	0	0
Central & West Asia	Kazakhstan	Rye	Cereal Grains	22520	1.75	0.03941	0.3451	0.2392	0.1356	0.0136004	0.00942687	0.005344
Central & West Asia	Kyrgyzstan	Rye	Cereal Grains	1109	1.75	0.00194075	0.3451	0.2392	0.1356	0.000669753	0.000464227	0.000263166
Latin America	Mexico	Rye	Cereal Grains	9	1.75	1.575e-05	0.3451	0.2392	0.1356	5.43533e-06	3.7674e-06	2.1357e-06
Latin America	Peru	Rye	Cereal Grains	89	1.75	0.00015575	0.3451	0.2392	0.1356	5.37493e-05	3.72554e-05	2.11197e-05
East Asia	Republic of Korea	Rye	Cereal Grains	4	1.75	7e-06	0.3451	0.2392	0.1356	2.4157e-06	1.6744e-06	9.492e-07
Central & West Asia	Tajikistan	Rye	Cereal Grains	351	1.75	0.00061425	0.3451	0.2392	0.1356	0.000211978	0.000146929	8.32923e-05
Central & West Asia	Turkey	Rye	Cereal Grains	320000	1.75	0.56	0.3451	0.2392	0.1356	0.193256	0.133952	0.075936
Central & West Asia	Turkmenistan	Rye	Cereal Grains		1.75	0	0.3451	0.2392	0.1356	0	0	0
North America	United States of America	Rye	Cereal Grains	214180	1.75	0.374815	0.3451	0.2392	0.1356	0.129349	0.0896557	0.0508249
Central & West Asia	Uzbekistan	Rye	Cereal Grains	7078	1.75	0.0123865	0.3451	0.2392	0.1356	0.00427458	0.00296285	0.00167961
South East Asia	Viet Nam	Rye	Cereal Grains		1.75	0	0.3451	0.2392	0.1356	0	0	0
Pacific		Rye	Cereal Grains	#VALUE!	1.75	#VALUE!	0.3451	0.2392	0.1356	#VALUE!	#VALUE!	#VALUE!
Europe		Rye	Cereal Grains	9131387	1.75	15.9799	0.3451	0.2392	0.1356	5.51467	3.8224	2.16688
Africa		Rye	Cereal Grains	98541	1.75	0.172447	0.3451	0.2392	0.1356	0.0595114	0.0412493	0.0233838
World		Rye	Cereal Grains	11273579	1.75	19.7288	0.3451	0.2392	0.1356	6.8084	4.71912	2.67522
Latin America	Argentina	Sorghum	Cereal Grains	1563445	1.75	2.73603	0.3451	0.2392	0.1356	0.944204	0.654458	0.371005
Central & West Asia	Azerbaijan	Sorghum	Cereal Grains	198	1.75	0.0003465	0.3451	0.2392	0.1356	0.000119577	8.28828e-05	4.69854e-05
South Asia	Bangladesh	Sorghum	Cereal Grains	87	1.75	0.00015225	0.3451	0.2392	0.1356	5.25415e-05	3.64182e-05	2.06451e-05
Latin America	Belize	Sorghum	Cereal Grains	8200	1.75	0.01435	0.3451	0.2392	0.1356	0.00495219	0.00343252	0.00194586
Latin America	Bolivia (Plurinational State of)	Sorghum	Cereal Grains	1023314	1.75	1.7908	0.3451	0.2392	0.1356	0.618005	0.428359	0.242832
Latin America	Brazil	Sorghum	Cereal Grains	2272939	1.75	3.97764	0.3451	0.2392	0.1356	1.37268	0.951452	0.539368
East Asia	China	Sorghum	Cereal Grains	2194361	1.75	3.84013	0.3451	0.2392	0.1356	1.32523	0.91856	0.520722
East Asia	Taiwan	Sorghum	Cereal Grains	2329	1.75	0.00407575	0.3451	0.2392	0.1356	0.00140654	0.000974919	0.000552672
Latin America	Colombia	Sorghum	Cereal Grains	15515	1.75	0.0271512	0.3451	0.2392	0.1356	0.0093699	0.00649458	0.00368171
Latin America	Costa Rica	Sorghum	Cereal Grains		1.75	0	0.3451	0.2392	0.1356	0	0	0
East Asia	Democratic People's Republic of Korea	Sorghum	Cereal Grains	35836	1.75	0.062713	0.3451	0.2392	0.1356	0.0216423	0.0150009	0.00850388
Latin America	Ecuador	Sorghum	Cereal Grains	14988	1.75	0.026229	0.3451	0.2392	0.1356	0.00905163	0.00627398	0.00355665
Latin America	El Salvador	Sorghum	Cereal Grains	109290	1.75	0.191257	0.3451	0.2392	0.1356	0.066003	0.0457488	0.0259345
Latin America	Guatemala	Sorghum	Cereal Grains	49333	1.75	0.0863327	0.3451	0.2392	0.1356	0.0297934	0.0206508	0.0117067
Latin America	Honduras	Sorghum	Cereal Grains	25000	1.75	0.04375	0.3451	0.2392	0.1356	0.0150981	0.010465	0.0059325
South Asia	India	Sorghum	Cereal Grains	4800000	1.75	8.4	0.3451	0.2392	0.1356	2.89884	2.00928	1.13904
Central & West Asia	Iraq	Sorghum	Cereal Grains	19562	1.75	0.0342335	0.3451	0.2392	0.1356	0.011814	0.00818865	0.00464206
Central & West Asia	Israel	Sorghum	Cereal Grains	47924	1.75	0.083867	0.3451	0.2392	0.1356	0.0289425	0.020061	0.0113724
East Asia	Japan	Sorghum	Cereal Grains		1.75	0	0.3451	0.2392	0.1356	0	0	0
Central & West Asia	Jordan	Sorghum	Cereal Grains	13431	1.75	0.0235043	0.3451	0.2392	0.1356	0.00811132	0.00562222	0.00318718
Central & West Asia	Kazakhstan	Sorghum	Cereal Grains	2305	1.75	0.00403375	0.3451	0.2392	0.1356	0.00139205	0.000964873	0.000546976
Central & West Asia	Kyrgyzstan	Sorghum	Cereal Grains	52	1.75	9.1e-05	0.3451	0.2392	0.1356	3.14041e-05	2.17672e-05	1.23396e-05
Central & West Asia	Lebanon	Sorghum	Cereal Grains	453	1.75	0.00079275	0.3451	0.2392	0.1356	0.000273578	0.000189626	0.000107497
South Asia	Maldives	Sorghum	Cereal Grains	53	1.75	9.275e-05	0.3451	0.2392	0.1356	3.2008e-05	2.21858e-05	1.25769e-05
Latin America	Mexico	Sorghum	Cereal Grains	4531097	1.75	7.92942	0.3451	0.2392	0.1356	2.73644	1.89672	1.07523
South East Asia	Myanmar	Sorghum	Cereal Grains	218392	1.75	0.382186	0.3451	0.2392	0.1356	0.131892	0.0914189	0.0518244
Latin America	Nicaragua	Sorghum	Cereal Grains	60156	1.75	0.105273	0.3451	0.2392	0.1356	0.0363297	0.0251813	0.014275
Central & West Asia	Oman	Sorghum	Cereal Grains	49330	1.75	0.0863275	0.3451	0.2392	0.1356	0.0297916	0.0206495	0.011706
South Asia	Pakistan	Sorghum	Cereal Grains	148729	1.75	0.260276	0.3451	0.2392	0.1356	0.0898212	0.062258	0.0352934
Central & West Asia	Palestine	Sorghum	Cereal Grains	276	1.75	0.000483	0.3451	0.2392	0.1356	0.000166683	0.000115534	6.54948e-05
Latin America	Panama	Sorghum	Cereal Grains	1859	1.75	0.00325325	0.3451	0.2392	0.1356	0.0011227	0.000778177	0.000441141
Latin America	Paraguay	Sorghum	Cereal Grains	107879	1.75	0.188788	0.3451	0.2392	0.1356	0.0651508	0.0451581	0.0255997
Latin America	Peru	Sorghum	Cereal Grains	209	1.75	0.00036575	0.3451	0.2392	0.1356	0.00012622	8.74874e-05	4.95957e-05
South East Asia	Philippines	Sorghum	Cereal Grains	564	1.75	0.000987	0.3451	0.2392	0.1356	0.000340614	0.00023609	0.000133837
East Asia	Republic of Korea	Sorghum	Cereal Grains	2702	1.75	0.0047285	0.3451	0.2392	0.1356	0.00163181	0.00113106	0.000641185
Central & West Asia	Saudi Arabia	Sorghum	Cereal Grains	144038	1.75	0.252067	0.3451	0.2392	0.1356	0.0869881	0.0602943	0.0341802
South Asia	Sri Lanka	Sorghum	Cereal Grains	169	1.75	0.00029575	0.3451	0.2392	0.1356	0.000102063	7.07434e-05	4.01037e-05
Central & West Asia	Syria	Sorghum	Cereal Grains	1726	1.75	0.0030205	0.3451	0.2392	0.1356	0.00104237	0.000722504	0.00040958
Central & West Asia	Tajikistan	Sorghum	Cereal Grains	115	1.75	0.00020125	0.3451	0.2392	0.1356	6.94514e-05	4.8139e-05	2.72895e-05
South East Asia	Thailand	Sorghum	Cereal Grains	34157	1.75	0.0597748	0.3451	0.2392	0.1356	0.0206283	0.0142981	0.00810546
Central & West Asia	Turkey	Sorghum	Cereal Grains	3	1.75	5.25e-06	0.3451	0.2392	0.1356	1.81177e-06	1.2558e-06	7.119e-07
Central & West Asia	Turkmenistan	Sorghum	Cereal Grains		1.75	0	0.3451	0.2392	0.1356	0	0	0
Central & West Asia	United Arab Emirates	Sorghum	Cereal Grains		1.75	0	0.3451	0.2392	0.1356	0	0	0
North America	United States of America	Sorghum	Cereal Grains	9271070	1.75	16.2244	0.3451	0.2392	0.1356	5.59903	3.88087	2.20002
Latin America	Uruguay	Sorghum	Cereal Grains	76000	1.75	0.133	0.3451	0.2392	0.1356	0.0458983	0.0318136	0.0180348
Central & West Asia	Uzbekistan	Sorghum	Cereal Grains	7000	1.75	0.01225	0.3451	0.2392	0.1356	0.00422748	0.0029302	0.0016611
Latin America	Venezuela (Bolivarian Republic of)	Sorghum	Cereal Grains	37546	1.75	0.0657055	0.3451	0.2392	0.1356	0.022675	0.0157168	0.00890967
South East Asia	Viet Nam	Sorghum	Cereal Grains		1.75	0	0.3451	0.2392	0.1356	0	0	0
Central & West Asia	Yemen	Sorghum	Cereal Grains	252324	1.75	0.441567	0.3451	0.2392	0.1356	0.152385	0.105623	0.0598765
Pacific		Sorghum	Cereal Grains	#VALUE!	1.75	#VALUE!	0.3451	0.2392	0.1356	#VALUE!	#VALUE!	#VALUE!
Europe		Sorghum	Cereal Grains	1079149	1.75	1.88851	0.3451	0.2392	0.1356	0.651725	0.451732	0.256082
Africa		Sorghum	Cereal Grains	29782406	1.75	52.1192	0.3451	0.2392	0.1356	17.9863	12.4669	7.06736
Caribbean		Sorghum	Cereal Grains	76580	1.75	0.134015	0.3451	0.2392	0.1356	0.0462486	0.0320564	0.0181724
World		Sorghum	Cereal Grains	59342103	1.75	103.849	0.3451	0.2392	0.1356	35.8382	24.8406	14.0819
Latin America	Brazil	Triticale	Cereal Grains	32948	1.75	0.057659	0.3451	0.2392	0.1356	0.0198981	0.013792	0.00781856
North America	Canada	Triticale	Cereal Grains	62200	1.75	0.10885	0.3451	0.2392	0.1356	0.0375641	0.0260369	0.0147601
Latin America	Chile	Triticale	Cereal Grains	142592	1.75	0.249536	0.3451	0.2392	0.1356	0.0861149	0.059689	0.0338371
East Asia	China	Triticale	Cereal Grains	773536	1.75	1.35369	0.3451	0.2392	0.1356	0.467158	0.323802	0.18356
Central & West Asia	Kyrgyzstan	Triticale	Cereal Grains	587	1.75	0.00102725	0.3451	0.2392	0.1356	0.000354504	0.000245718	0.000139295
Latin America	Mexico	Triticale	Cereal Grains	25403	1.75	0.0444553	0.3451	0.2392	0.1356	0.0153415	0.0106337	0.00602813
Central & West Asia	Turkey	Triticale	Cereal Grains	170000	1.75	0.2975	0.3451	0.2392	0.1356	0.102667	0.071162	0.040341
Pacific		Triticale	Cereal Grains	#VALUE!	1.75	#VALUE!	0.3451	0.2392	0.1356	#VALUE!	#VALUE!	#VALUE!
Europe		Triticale	Cereal Grains	11479366	1.75	20.0889	0.3451	0.2392	0.1356	6.93268	4.80526	2.72405
Africa		Triticale	Cereal Grains	29002	1.75	0.0507535	0.3451	0.2392	0.1356	0.017515	0.0121402	0.00688217
World		Triticale	Cereal Grains	12802592	1.75	22.4045	0.3451	0.2392	0.1356	7.73181	5.35917	3.03806
South Asia	Afghanistan	Wheat	Cereal Grains	3613300	1.75	6.32327	0.3451	0.2392	0.1356	2.18216	1.51253	0.857436
Latin America	Argentina	Wheat	Cereal Grains	18518045	1.75	32.4066	0.3451	0.2392	0.1356	11.1835	7.75165	4.39433
Central & West Asia	Armenia	Wheat	Cereal Grains	187453	1.75	0.328043	0.3451	0.2392	0.1356	0.113208	0.0784678	0.0444826
Central & West Asia	Azerbaijan	Wheat	Cereal Grains	1991683	1.75	3.48545	0.3451	0.2392	0.1356	1.20283	0.833719	0.472626
South Asia	Bangladesh	Wheat	Cereal Grains	1099373	1.75	1.9239	0.3451	0.2392	0.1356	0.663939	0.460198	0.260881
South Asia	Bhutan	Wheat	Cereal Grains	4141	1.75	0.00724675	0.3451	0.2392	0.1356	0.00250085	0.00173342	0.000982659
Latin America	Bolivia (Plurinational State of)	Wheat	Cereal Grains	301689	1.75	0.527956	0.3451	0.2392	0.1356	0.182198	0.126287	0.0715908
Latin America	Brazil	Wheat	Cereal Grains	5418711	1.75	9.48274	0.3451	0.2392	0.1356	3.2725	2.26827	1.28586
North America	Canada	Wheat	Cereal Grains	31769200	1.75	55.5961	0.3451	0.2392	0.1356	19.1862	13.2986	7.53883
Latin America	Chile	Wheat	Cereal Grains	1469003	1.75	2.57076	0.3451	0.2392	0.1356	0.887168	0.614925	0.348594
East Asia	China	Wheat	Cereal Grains	131447224	1.75	230.033	0.3451	0.2392	0.1356	79.3843	55.0238	31.1924
East Asia	Taiwan	Wheat	Cereal Grains	6724	1.75	0.011767	0.3451	0.2392	0.1356	0.00406079	0.00281467	0.00159561
Latin America	Colombia	Wheat	Cereal Grains	11139	1.75	0.0194933	0.3451	0.2392	0.1356	0.00672712	0.00466279	0.00264328
East Asia	Democratic People's Republic of Korea	Wheat	Cereal Grains	35000	1.75	0.06125	0.3451	0.2392	0.1356	0.0211374	0.014651	0.0083055
Latin America	Ecuador	Wheat	Cereal Grains	5398	1.75	0.0094465	0.3451	0.2392	0.1356	0.00325999	0.0022596	0.00128095
Central & West Asia	Georgia	Wheat	Cereal Grains	107100	1.75	0.187425	0.3451	0.2392	0.1356	0.0646804	0.0448321	0.0254148
Latin America	Guatemala	Wheat	Cereal Grains	1282	1.75	0.0022435	0.3451	0.2392	0.1356	0.000774232	0.000536645	0.000304219
Latin America	Honduras	Wheat	Cereal Grains	1248	1.75	0.002184	0.3451	0.2392	0.1356	0.000753698	0.000522413	0.00029615
South Asia	India	Wheat	Cereal Grains	99700000	1.75	174.475	0.3451	0.2392	0.1356	60.2113	41.7344	23.6588
Central & West Asia	Iran	Wheat	Cereal Grains	14500000	1.75	25.375	0.3451	0.2392	0.1356	8.75691	6.0697	3.44085
Central & West Asia	Iraq	Wheat	Cereal Grains	3211382	1.75	5.61992	0.3451	0.2392	0.1356	1.93943	1.34428	0.762061
Central & West Asia	Israel	Wheat	Cereal Grains	70500	1.75	0.123375	0.3451	0.2392	0.1356	0.0425767	0.0295113	0.0167296
East Asia	Japan	Wheat	Cereal Grains	764900	1.75	1.33858	0.3451	0.2392	0.1356	0.461942	0.320187	0.181511
Central & West Asia	Jordan	Wheat	Cereal Grains	20668	1.75	0.036169	0.3451	0.2392	0.1356	0.0124819	0.00865162	0.00490452
Central & West Asia	Kazakhstan	Wheat	Cereal Grains	13944108	1.75	24.4022	0.3451	0.2392	0.1356	8.4212	5.837	3.30894
Central & West Asia	Kuwait	Wheat	Cereal Grains	9	1.75	1.575e-05	0.3451	0.2392	0.1356	5.43533e-06	3.7674e-06	2.1357e-06
Central & West Asia	Kyrgyzstan	Wheat	Cereal Grains	615926	1.75	1.07787	0.3451	0.2392	0.1356	0.371973	0.257827	0.146159
Central & West Asia	Lebanon	Wheat	Cereal Grains	135411	1.75	0.236969	0.3451	0.2392	0.1356	0.0817781	0.056683	0.032133
Latin America	Mexico	Wheat	Cereal Grains	2943445	1.75	5.15103	0.3451	0.2392	0.1356	1.77762	1.23213	0.698479
East Asia	Mongolia	Wheat	Cereal Grains	436115	1.75	0.763201	0.3451	0.2392	0.1356	0.263381	0.182558	0.10349
South East Asia	Myanmar	Wheat	Cereal Grains	134372	1.75	0.235151	0.3451	0.2392	0.1356	0.0811506	0.0562481	0.0318865
South Asia	Nepal	Wheat	Cereal Grains	1949001	1.75	3.41075	0.3451	0.2392	0.1356	1.17705	0.815852	0.462498
Central & West Asia	Oman	Wheat	Cereal Grains	3579	1.75	0.00626325	0.3451	0.2392	0.1356	0.00216145	0.00149817	0.000849297
South Asia	Pakistan	Wheat	Cereal Grains	25076149	1.75	43.8833	0.3451	0.2392	0.1356	15.1441	10.4969	5.95057
Central & West Asia	Palestine	Wheat	Cereal Grains	34167	1.75	0.0597922	0.3451	0.2392	0.1356	0.0206343	0.0143023	0.00810783
Latin America	Paraguay	Wheat	Cereal Grains	722400	1.75	1.2642	0.3451	0.2392	0.1356	0.436275	0.302397	0.171426
Latin America	Peru	Wheat	Cereal Grains	195088	1.75	0.341404	0.3451	0.2392	0.1356	0.117819	0.0816638	0.0462944
Central & West Asia	Qatar	Wheat	Cereal Grains	15	1.75	2.625e-05	0.3451	0.2392	0.1356	9.05888e-06	6.279e-06	3.5595e-06
East Asia	Republic of Korea	Wheat	Cereal Grains	37577	1.75	0.0657598	0.3451	0.2392	0.1356	0.0226937	0.0157297	0.00891702
Central & West Asia	Saudi Arabia	Wheat	Cereal Grains	586413	1.75	1.02622	0.3451	0.2392	0.1356	0.354149	0.245472	0.139156
Central & West Asia	Syria	Wheat	Cereal Grains	1200000	1.75	2.1	0.3451	0.2392	0.1356	0.72471	0.50232	0.28476
Central & West Asia	Tajikistan	Wheat	Cereal Grains	778986	1.75	1.36323	0.3451	0.2392	0.1356	0.470449	0.326084	0.184853
South East Asia	Thailand	Wheat	Cereal Grains	1351	1.75	0.00236425	0.3451	0.2392	0.1356	0.000815903	0.000565529	0.000320592
Central & West Asia	Turkey	Wheat	Cereal Grains	20000000	1.75	35	0.3451	0.2392	0.1356	12.0785	8.372	4.746
Central & West Asia	Turkmenistan	Wheat	Cereal Grains	1000000	1.75	1.75	0.3451	0.2392	0.1356	0.603925	0.4186	0.2373
Central & West Asia	United Arab Emirates	Wheat	Cereal Grains		1.75	0	0.3451	0.2392	0.1356	0	0	0
North America	United States of America	Wheat	Cereal Grains	51286540	1.75	89.7514	0.3451	0.2392	0.1356	30.9732	21.4685	12.1703
Latin America	Uruguay	Wheat	Cereal Grains	440000	1.75	0.77	0.3451	0.2392	0.1356	0.265727	0.184184	0.104412
Central & West Asia	Uzbekistan	Wheat	Cereal Grains	5410760	1.75	9.46883	0.3451	0.2392	0.1356	3.26769	2.26494	1.28397
Latin America	Venezuela (Bolivarian Republic of)	Wheat	Cereal Grains	144	1.75	0.000252	0.3451	0.2392	0.1356	8.69652e-05	6.02784e-05	3.41712e-05
Central & West Asia	Yemen	Wheat	Cereal Grains	105503	1.75	0.18463	0.3451	0.2392	0.1356	0.0637159	0.0441636	0.0250359
Pacific		Wheat	Cereal Grains	#VALUE!	1.75	#VALUE!	0.3451	0.2392	0.1356	#VALUE!	#VALUE!	#VALUE!
Pacific		Wheat	Cereal Grains	#VALUE!	1.75	#VALUE!	0.3451	0.2392	0.1356	#VALUE!	#VALUE!	#VALUE!
Europe		Wheat	Cereal Grains	242139737	1.75	423.745	0.3451	0.2392	0.1356	146.234	101.36	57.4598
Africa		Wheat	Cereal Grains	29289721	1.75	51.257	0.3451	0.2392	0.1356	17.6888	12.2607	6.95045
World		Wheat	Cereal Grains	734045174	1.75	1284.58	0.3451	0.2392	0.1356	443.308	307.271	174.189
Latin America	Bolivia (Plurinational State of)	Quinoa	Cereal Grains	70763	1.75	0.123835	0.3451	0.2392	0.1356	0.0427355	0.0296214	0.0167921
Latin America	Ecuador	Quinoa	Cereal Grains	2146	1.75	0.0037555	0.3451	0.2392	0.1356	0.00129602	0.000898316	0.000509246
Latin America	Peru	Quinoa	Cereal Grains	86011	1.75	0.150519	0.3451	0.2392	0.1356	0.0519442	0.0360042	0.0204104
Europe		Quinoa	Cereal Grains		1.75	0	0.3451	0.2392	0.1356	0	0	0
World		Quinoa	Cereal Grains	158920	1.75	0.27811	0.3451	0.2392	0.1356	0.0959758	0.0665239	0.0377117
Africa		Fonio	Cereal Grains	631576	1.75	1.10526	0.3451	0.2392	0.1356	0.381425	0.264378	0.149873
World		Fonio	Cereal Grains	631576	1.75	1.10526	0.3451	0.2392	0.1356	0.381425	0.264378	0.149873
Latin America	Colombia	Agave fibres nes	Fibre Crops	14884	2.3775	0.0353867	0.5434	0.1432	0.1201	0.0192291	0.00506738	0.00424994
Latin America	Ecuador	Agave fibres nes	Fibre Crops	4411	2.3775	0.0104872	0.5434	0.1432	0.1201	0.00569872	0.00150176	0.00125951
Latin America	El Salvador	Agave fibres nes	Fibre Crops	1531	2.3775	0.00363995	0.5434	0.1432	0.1201	0.00197795	0.000521241	0.000437158
Latin America	Guatemala	Agave fibres nes	Fibre Crops	106	2.3775	0.000252015	0.5434	0.1432	0.1201	0.000136945	3.60885e-05	3.0267e-05
Latin America	Mexico	Agave fibres nes	Fibre Crops	6068	2.3775	0.0144267	0.5434	0.1432	0.1201	0.00783945	0.0020659	0.00173264
Latin America	Nicaragua	Agave fibres nes	Fibre Crops	5624	2.3775	0.0133711	0.5434	0.1432	0.1201	0.00726583	0.00191474	0.00160586
South East Asia	Philippines	Agave fibres nes	Fibre Crops	3966	2.3775	0.00942916	0.5434	0.1432	0.1201	0.00512381	0.00135026	0.00113244
Europe		Agave fibres nes	Fibre Crops		2.3775	0	0.5434	0.1432	0.1201	0	0	0
Caribbean		Agave fibres nes	Fibre Crops	3649	2.3775	0.0086755	0.5434	0.1432	0.1201	0.00471427	0.00124233	0.00104193
World		Agave fibres nes	Fibre Crops	40239	2.3775	0.0956682	0.5434	0.1432	0.1201	0.0519861	0.0136997	0.0114898
South Asia	Bangladesh	Bastfibres, other	Fibre Crops	2140	2.3775	0.00508785	0.5434	0.1432	0.1201	0.00276474	0.00072858	0.000611051
Latin America	Brazil	Bastfibres, other	Fibre Crops	2892	2.3775	0.00687573	0.5434	0.1432	0.1201	0.00373627	0.000984605	0.000825775
Latin America	Chile	Bastfibres, other	Fibre Crops	8832	2.3775	0.0209981	0.5434	0.1432	0.1201	0.0114104	0.00300693	0.00252187
East Asia	China	Bastfibres, other	Fibre Crops	21510	2.3775	0.05114	0.5434	0.1432	0.1201	0.0277895	0.00732325	0.00614192
Latin America	El Salvador	Bastfibres, other	Fibre Crops	832	2.3775	0.00197808	0.5434	0.1432	0.1201	0.00107489	0.000283261	0.000237567
Latin America	Guatemala	Bastfibres, other	Fibre Crops	233	2.3775	0.000553957	0.5434	0.1432	0.1201	0.000301021	7.93267e-05	6.65303e-05
South Asia	India	Bastfibres, other	Fibre Crops	89898	2.3775	0.213732	0.5434	0.1432	0.1201	0.116142	0.0306065	0.0256693
South East Asia	Indonesia	Bastfibres, other	Fibre Crops	2730	2.3775	0.00649058	0.5434	0.1432	0.1201	0.00352698	0.00092945	0.000779518
South East Asia	Malaysia	Bastfibres, other	Fibre Crops	8403	2.3775	0.0199781	0.5434	0.1432	0.1201	0.0108561	0.00286087	0.00239937
South East Asia	Myanmar	Bastfibres, other	Fibre Crops	955	2.3775	0.00227051	0.5434	0.1432	0.1201	0.0012338	0.000325137	0.000272689
South Asia	Pakistan	Bastfibres, other	Fibre Crops	467	2.3775	0.00111029	0.5434	0.1432	0.1201	0.000603333	0.000158994	0.000133346
South East Asia	Thailand	Bastfibres, other	Fibre Crops	3382	2.3775	0.00804071	0.5434	0.1432	0.1201	0.00436932	0.00115143	0.000965689
Europe		Bastfibres, other	Fibre Crops	49868	2.3775	0.118561	0.5434	0.1432	0.1201	0.0644261	0.016978	0.0142392
Africa		Bastfibres, other	Fibre Crops	17247	2.3775	0.0410047	0.5434	0.1432	0.1201	0.022282	0.00587188	0.00492467
Caribbean		Bastfibres, other	Fibre Crops	11888	2.3775	0.0282637	0.5434	0.1432	0.1201	0.0153585	0.00404736	0.00339447
World		Bastfibres, other	Fibre Crops	221276	2.3775	0.526084	0.5434	0.1432	0.1201	0.285874	0.0753352	0.0631827
South Asia	Bangladesh	Coir	Fibre Crops	10321	2.3775	0.0245382	0.5434	0.1432	0.1201	0.013334	0.00351387	0.00294704
South Asia	India	Coir	Fibre Crops	572002	2.3775	1.35993	0.5434	0.1432	0.1201	0.738989	0.194743	0.163328
South East Asia	Malaysia	Coir	Fibre Crops	21521	2.3775	0.0511662	0.5434	0.1432	0.1201	0.0278037	0.007327	0.00614506
South Asia	Sri Lanka	Coir	Fibre Crops	159460	2.3775	0.379116	0.5434	0.1432	0.1201	0.206012	0.0542894	0.0455318
South East Asia	Thailand	Coir	Fibre Crops	60559	2.3775	0.143979	0.5434	0.1432	0.1201	0.0782382	0.0206178	0.0172919
South East Asia	Viet Nam	Coir	Fibre Crops	372714	2.3775	0.886128	0.5434	0.1432	0.1201	0.481522	0.126893	0.106424
Africa		Coir	Fibre Crops	42149	2.3775	0.100209	0.5434	0.1432	0.1201	0.0544537	0.01435	0.0120351
World		Coir	Fibre Crops	1238725	2.3775	2.94507	0.5434	0.1432	0.1201	1.60035	0.421734	0.353703
Latin America	Argentina	Fibre crops nes	Fibre Crops	1327	2.3775	0.00315494	0.5434	0.1432	0.1201	0.0017144	0.000451788	0.000378909
South Asia	Bangladesh	Fibre crops nes	Fibre Crops	409	2.3775	0.000972397	0.5434	0.1432	0.1201	0.000528401	0.000139247	0.000116785
Latin America	Brazil	Fibre crops nes	Fibre Crops	100061	2.3775	0.237895	0.5434	0.1432	0.1201	0.129272	0.0340666	0.0285712
South East Asia	Cambodia	Fibre crops nes	Fibre Crops	3799	2.3775	0.00903212	0.5434	0.1432	0.1201	0.00490806	0.0012934	0.00108476
North America	Canada	Fibre crops nes	Fibre Crops	27112	2.3775	0.0644588	0.5434	0.1432	0.1201	0.0350269	0.0092305	0.0077415
Latin America	Chile	Fibre crops nes	Fibre Crops	1818	2.3775	0.0043223	0.5434	0.1432	0.1201	0.00234874	0.000618953	0.000519108
East Asia	China	Fibre crops nes	Fibre Crops	371	2.3775	0.000882052	0.5434	0.1432	0.1201	0.000479307	0.00012631	0.000105935
East Asia	Taiwan	Fibre crops nes	Fibre Crops	371	2.3775	0.000882052	0.5434	0.1432	0.1201	0.000479307	0.00012631	0.000105935
Central & West Asia	Iran	Fibre crops nes	Fibre Crops		2.3775	0	0.5434	0.1432	0.1201	0	0	0
South East Asia	Myanmar	Fibre crops nes	Fibre Crops	144	2.3775	0.00034236	0.5434	0.1432	0.1201	0.000186038	4.9026e-05	4.11174e-05
South East Asia	Philippines	Fibre crops nes	Fibre Crops	2071	2.3775	0.0049238	0.5434	0.1432	0.1201	0.00267559	0.000705089	0.000591349
East Asia	Republic of Korea	Fibre crops nes	Fibre Crops		2.3775	0	0.5434	0.1432	0.1201	0	0	0
South East Asia	Thailand	Fibre crops nes	Fibre Crops	638	2.3775	0.00151684	0.5434	0.1432	0.1201	0.000824254	0.000217212	0.000182173
South East Asia	Viet Nam	Fibre crops nes	Fibre Crops	92917	2.3775	0.22091	0.5434	0.1432	0.1201	0.120043	0.0316343	0.0265313
Pacific		Fibre crops nes	Fibre Crops	4472	2.3775	0.0106322	0.5434	0.1432	0.1201	0.00577753	0.00152253	0.00127692
Africa		Fibre crops nes	Fibre Crops	47895	2.3775	0.11387	0.5434	0.1432	0.1201	0.0618772	0.0163062	0.0136758
Caribbean		Fibre crops nes	Fibre Crops	344	2.3775	0.00081786	0.5434	0.1432	0.1201	0.000444425	0.000117118	9.8225e-05
World		Fibre crops nes	Fibre Crops	283378	2.3775	0.673731	0.5434	0.1432	0.1201	0.366106	0.0964783	0.0809151
South Asia	Afghanistan	Fibre Crops Primary	Fibre Crops	13034	2.3775	0.0309883	0.5434	0.1432	0.1201	0.0168391	0.00443753	0.0037217
Latin America	Argentina	Fibre Crops Primary	Fibre Crops	303988	2.3775	0.722731	0.5434	0.1432	0.1201	0.392732	0.103495	0.0868
Central & West Asia	Armenia	Fibre Crops Primary	Fibre Crops		2.3775	0	0.5434	0.1432	0.1201	0	0	0
Central & West Asia	Azerbaijan	Fibre Crops Primary	Fibre Crops	61038	2.3775	0.145118	0.5434	0.1432	0.1201	0.078857	0.0207809	0.0174287
South Asia	Bangladesh	Fibre Crops Primary	Fibre Crops	1635211	2.3775	3.88771	0.5434	0.1432	0.1201	2.11258	0.556721	0.466914
South Asia	Bhutan	Fibre Crops Primary	Fibre Crops	341	2.3775	0.000810727	0.5434	0.1432	0.1201	0.000440549	0.000116096	9.73684e-05
Latin America	Bolivia (Plurinational State of)	Fibre Crops Primary	Fibre Crops	31600	2.3775	0.075129	0.5434	0.1432	0.1201	0.0408251	0.0107585	0.00902299
Latin America	Brazil	Fibre Crops Primary	Fibre Crops	1810096	2.3775	4.3035	0.5434	0.1432	0.1201	2.33852	0.616262	0.516851
South East Asia	Cambodia	Fibre Crops Primary	Fibre Crops	4086	2.3775	0.00971447	0.5434	0.1432	0.1201	0.00527884	0.00139111	0.00116671
North America	Canada	Fibre Crops Primary	Fibre Crops	27112	2.3775	0.0644588	0.5434	0.1432	0.1201	0.0350269	0.0092305	0.0077415
Latin America	Chile	Fibre Crops Primary	Fibre Crops	17976	2.3775	0.0427379	0.5434	0.1432	0.1201	0.0232238	0.00612007	0.00513283
East Asia	China	Fibre Crops Primary	Fibre Crops	6298331	2.3775	14.9743	0.5434	0.1432	0.1201	8.13702	2.14432	1.79841
East Asia	Taiwan	Fibre Crops Primary	Fibre Crops	633	2.3775	0.00150496	0.5434	0.1432	0.1201	0.000817794	0.00021551	0.000180745
Latin America	Colombia	Fibre Crops Primary	Fibre Crops	44884	2.3775	0.106712	0.5434	0.1432	0.1201	0.0579871	0.0152811	0.0128161
Latin America	Costa Rica	Fibre Crops Primary	Fibre Crops	1413	2.3775	0.00335941	0.5434	0.1432	0.1201	0.0018255	0.000481067	0.000403465
East Asia	Democratic People's Republic of Korea	Fibre Crops Primary	Fibre Crops	26891	2.3775	0.0639334	0.5434	0.1432	0.1201	0.0347414	0.00915526	0.0076784
Latin America	Ecuador	Fibre Crops Primary	Fibre Crops	44766	2.3775	0.106431	0.5434	0.1432	0.1201	0.0578347	0.0152409	0.0127824
Latin America	El Salvador	Fibre Crops Primary	Fibre Crops	2540	2.3775	0.00603885	0.5434	0.1432	0.1201	0.00328151	0.000864763	0.000725266
Central & West Asia	Georgia	Fibre Crops Primary	Fibre Crops		2.3775	0	0.5434	0.1432	0.1201	0	0	0
Latin America	Guatemala	Fibre Crops Primary	Fibre Crops	1079	2.3775	0.00256532	0.5434	0.1432	0.1201	0.001394	0.000367354	0.000308095
Latin America	Honduras	Fibre Crops Primary	Fibre Crops	1020	2.3775	0.00242505	0.5434	0.1432	0.1201	0.00131777	0.000347267	0.000291249
South Asia	India	Fibre Crops Primary	Fibre Crops	6731762	2.3775	16.0048	0.5434	0.1432	0.1201	8.69699	2.29188	1.92217
South East Asia	Indonesia	Fibre Crops Primary	Fibre Crops	68423	2.3775	0.162676	0.5434	0.1432	0.1201	0.088398	0.0232952	0.0195373
Central & West Asia	Iran	Fibre Crops Primary	Fibre Crops	48785	2.3775	0.115986	0.5434	0.1432	0.1201	0.063027	0.0166092	0.01393
Central & West Asia	Iraq	Fibre Crops Primary	Fibre Crops	11075	2.3775	0.0263308	0.5434	0.1432	0.1201	0.0143082	0.00377057	0.00316233
Central & West Asia	Israel	Fibre Crops Primary	Fibre Crops	9200	2.3775	0.021873	0.5434	0.1432	0.1201	0.0118858	0.00313221	0.00262695
East Asia	Japan	Fibre Crops Primary	Fibre Crops	1	2.3775	2.3775e-06	0.5434	0.1432	0.1201	1.29193e-06	3.40458e-07	2.85538e-07
Central & West Asia	Kazakhstan	Fibre Crops Primary	Fibre Crops	113394	2.3775	0.269594	0.5434	0.1432	0.1201	0.146498	0.0386059	0.0323783
Central & West Asia	Kyrgyzstan	Fibre Crops Primary	Fibre Crops	24657	2.3775	0.058622	0.5434	0.1432	0.1201	0.0318552	0.00839467	0.0070405
South East Asia	Laos	Fibre Crops Primary	Fibre Crops	4994	2.3775	0.0118732	0.5434	0.1432	0.1201	0.00645192	0.00170025	0.00142598
South East Asia	Malaysia	Fibre Crops Primary	Fibre Crops	8403	2.3775	0.0199781	0.5434	0.1432	0.1201	0.0108561	0.00286087	0.00239937
Latin America	Mexico	Fibre Crops Primary	Fibre Crops	415076	2.3775	0.986843	0.5434	0.1432	0.1201	0.536251	0.141316	0.11852
South East Asia	Myanmar	Fibre Crops Primary	Fibre Crops	98121	2.3775	0.233283	0.5434	0.1432	0.1201	0.126766	0.0334061	0.0280172
South Asia	Nepal	Fibre Crops Primary	Fibre Crops	11195	2.3775	0.0266161	0.5434	0.1432	0.1201	0.0144632	0.00381143	0.0031966
Latin America	Nicaragua	Fibre Crops Primary	Fibre Crops	6434	2.3775	0.0152968	0.5434	0.1432	0.1201	0.0083123	0.00219051	0.00183715
South Asia	Pakistan	Fibre Crops Primary	Fibre Crops	1677766	2.3775	3.98889	0.5434	0.1432	0.1201	2.16756	0.571209	0.479066
Latin America	Paraguay	Fibre Crops Primary	Fibre Crops	5800	2.3775	0.0137895	0.5434	0.1432	0.1201	0.00749321	0.00197466	0.00165612
Latin America	Peru	Fibre Crops Primary	Fibre Crops	11263	2.3775	0.0267778	0.5434	0.1432	0.1201	0.014551	0.00383458	0.00321601
South East Asia	Philippines	Fibre Crops Primary	Fibre Crops	73197	2.3775	0.174026	0.5434	0.1432	0.1201	0.0945657	0.0249205	0.0209005
East Asia	Republic of Korea	Fibre Crops Primary	Fibre Crops	14	2.3775	3.3285e-05	0.5434	0.1432	0.1201	1.80871e-05	4.76641e-06	3.99753e-06
Central & West Asia	Saudi Arabia	Fibre Crops Primary	Fibre Crops		2.3775	0	0.5434	0.1432	0.1201	0	0	0
South Asia	Sri Lanka	Fibre Crops Primary	Fibre Crops	0	2.3775	0	0.5434	0.1432	0.1201	0	0	0
Central & West Asia	Syria	Fibre Crops Primary	Fibre Crops	30000	2.3775	0.071325	0.5434	0.1432	0.1201	0.038758	0.0102137	0.00856613
Central & West Asia	Tajikistan	Fibre Crops Primary	Fibre Crops	86000	2.3775	0.204465	0.5434	0.1432	0.1201	0.111106	0.0292794	0.0245562
South East Asia	Thailand	Fibre Crops Primary	Fibre Crops	30671	2.3775	0.0729203	0.5434	0.1432	0.1201	0.0396249	0.0104422	0.00875773
Central & West Asia	Turkey	Fibre Crops Primary	Fibre Crops	976613	2.3775	2.3219	0.5434	0.1432	0.1201	1.26172	0.332496	0.27886
Central & West Asia	Turkmenistan	Fibre Crops Primary	Fibre Crops	204000	2.3775	0.48501	0.5434	0.1432	0.1201	0.263554	0.0694534	0.0582497
North America	United States of America	Fibre Crops Primary	Fibre Crops	4003950	2.3775	9.51939	0.5434	0.1432	0.1201	5.17284	1.36318	1.14328
Latin America	Uruguay	Fibre Crops Primary	Fibre Crops	0	2.3775	0	0.5434	0.1432	0.1201	0	0	0
Central & West Asia	Uzbekistan	Fibre Crops Primary	Fibre Crops	772639	2.3775	1.83695	0.5434	0.1432	0.1201	0.998198	0.263051	0.220618
Latin America	Venezuela (Bolivarian Republic of)	Fibre Crops Primary	Fibre Crops	4357	2.3775	0.0103588	0.5434	0.1432	0.1201	0.00562895	0.00148338	0.00124409
South East Asia	Viet Nam	Fibre Crops Primary	Fibre Crops	93559	2.3775	0.222437	0.5434	0.1432	0.1201	0.120872	0.0318529	0.0267146
Central & West Asia	Yemen	Fibre Crops Primary	Fibre Crops	4270	2.3775	0.0101519	0.5434	0.1432	0.1201	0.00551656	0.00145376	0.00121925
Pacific		Fibre Crops Primary	Fibre Crops	954867	2.3775	2.2702	0.5434	0.1432	0.1201	1.23362	0.325092	0.272651
Europe		Fibre Crops Primary	Fibre Crops	1299932	2.3775	3.09059	0.5434	0.1432	0.1201	1.67943	0.442572	0.37118
Africa		Fibre Crops Primary	Fibre Crops	1666857	2.3775	3.96295	0.5434	0.1432	0.1201	2.15347	0.567495	0.475951
Caribbean		Fibre Crops Primary	Fibre Crops	29296	2.3775	0.0696512	0.5434	0.1432	0.1201	0.0378485	0.00997406	0.00836511
World		Fibre Crops Primary	Fibre Crops	29801977	2.3775	70.8542	0.5434	0.1432	0.1201	38.5022	10.1463	8.50959
Latin America	Argentina	Flax fibre and tow	Fibre Crops	2661	2.3775	0.00632653	0.5434	0.1432	0.1201	0.00343784	0.000905959	0.000759816
Latin America	Chile	Flax fibre and tow	Fibre Crops	3180	2.3775	0.00756045	0.5434	0.1432	0.1201	0.00410835	0.00108266	0.00090801
East Asia	China	Flax fibre and tow	Fibre Crops	13416	2.3775	0.0318965	0.5434	0.1432	0.1201	0.0173326	0.00456758	0.00383077
East Asia	Taiwan	Flax fibre and tow	Fibre Crops	259	2.3775	0.000615773	0.5434	0.1432	0.1201	0.000334611	8.81786e-05	7.39543e-05
East Asia	Japan	Flax fibre and tow	Fibre Crops		2.3775	0	0.5434	0.1432	0.1201	0	0	0
East Asia	Republic of Korea	Flax fibre and tow	Fibre Crops		2.3775	0	0.5434	0.1432	0.1201	0	0	0
Central & West Asia	Turkey	Flax fibre and tow	Fibre Crops	4	2.3775	9.51e-06	0.5434	0.1432	0.1201	5.16773e-06	1.36183e-06	1.14215e-06
Pacific		Flax fibre and tow	Fibre Crops		2.3775	0	0.5434	0.1432	0.1201	0	0	0
Europe		Flax fibre and tow	Fibre Crops	841213	2.3775	1.99998	0.5434	0.1432	0.1201	1.08679	0.286398	0.240198
Africa		Flax fibre and tow	Fibre Crops	7900	2.3775	0.0187823	0.5434	0.1432	0.1201	0.0102063	0.00268962	0.00225575
World		Flax fibre and tow	Fibre Crops	868374	2.3775	2.06456	0.5434	0.1432	0.1201	1.12188	0.295645	0.247954
South Asia	Bangladesh	Hemp tow waste	Fibre Crops		2.3775	0	0.5434	0.1432	0.1201	0	0	0
Latin America	Chile	Hemp tow waste	Fibre Crops	4146	2.3775	0.00985711	0.5434	0.1432	0.1201	0.00535636	0.00141154	0.00118384
East Asia	China	Hemp tow waste	Fibre Crops	12623	2.3775	0.0300112	0.5434	0.1432	0.1201	0.0163081	0.0042976	0.00360434
East Asia	Democratic People's Republic of Korea	Hemp tow waste	Fibre Crops	14891	2.3775	0.0354034	0.5434	0.1432	0.1201	0.0192382	0.00506976	0.00425194
South Asia	India	Hemp tow waste	Fibre Crops		2.3775	0	0.5434	0.1432	0.1201	0	0	0
East Asia	Japan	Hemp tow waste	Fibre Crops	1	2.3775	2.3775e-06	0.5434	0.1432	0.1201	1.29193e-06	3.40458e-07	2.85538e-07
South Asia	Pakistan	Hemp tow waste	Fibre Crops		2.3775	0	0.5434	0.1432	0.1201	0	0	0
East Asia	Republic of Korea	Hemp tow waste	Fibre Crops	14	2.3775	3.3285e-05	0.5434	0.1432	0.1201	1.80871e-05	4.76641e-06	3.99753e-06
Central & West Asia	Saudi Arabia	Hemp tow waste	Fibre Crops		2.3775	0	0.5434	0.1432	0.1201	0	0	0
Central & West Asia	Syria	Hemp tow waste	Fibre Crops	0	2.3775	0	0.5434	0.1432	0.1201	0	0	0
Central & West Asia	Turkey	Hemp tow waste	Fibre Crops	9	2.3775	2.13975e-05	0.5434	0.1432	0.1201	1.16274e-05	3.06412e-06	2.56984e-06
Europe		Hemp tow waste	Fibre Crops	28973	2.3775	0.0688833	0.5434	0.1432	0.1201	0.0374312	0.00986409	0.00827289
World		Hemp tow waste	Fibre Crops	60657	2.3775	0.144212	0.5434	0.1432	0.1201	0.0783648	0.0206512	0.0173199
South Asia	Bangladesh	Jute	Fibre Crops	1613762	2.3775	3.83672	0.5434	0.1432	0.1201	2.08487	0.549418	0.46079
South Asia	Bhutan	Jute	Fibre Crops	341	2.3775	0.000810727	0.5434	0.1432	0.1201	0.000440549	0.000116096	9.73684e-05
Latin America	Brazil	Jute	Fibre Crops	31	2.3775	7.37025e-05	0.5434	0.1432	0.1201	4.00499e-05	1.05542e-05	8.85167e-06
South East Asia	Cambodia	Jute	Fibre Crops	223	2.3775	0.000530182	0.5434	0.1432	0.1201	0.000288101	7.59221e-05	6.36749e-05
East Asia	China	Jute	Fibre Crops	30497	2.3775	0.0725066	0.5434	0.1432	0.1201	0.0394001	0.0103829	0.00870804
East Asia	Taiwan	Jute	Fibre Crops		2.3775	0	0.5434	0.1432	0.1201	0	0	0
Latin America	El Salvador	Jute	Fibre Crops	162	2.3775	0.000385155	0.5434	0.1432	0.1201	0.000209293	5.51542e-05	4.62571e-05
South Asia	India	Jute	Fibre Crops	1951864	2.3775	4.64056	0.5434	0.1432	0.1201	2.52168	0.664528	0.557331
Central & West Asia	Iran	Jute	Fibre Crops		2.3775	0	0.5434	0.1432	0.1201	0	0	0
East Asia	Japan	Jute	Fibre Crops		2.3775	0	0.5434	0.1432	0.1201	0	0	0
South East Asia	Myanmar	Jute	Fibre Crops	22	2.3775	5.2305e-05	0.5434	0.1432	0.1201	2.84225e-05	7.49008e-06	6.28183e-06
South Asia	Nepal	Jute	Fibre Crops	11159	2.3775	0.0265305	0.5434	0.1432	0.1201	0.0144167	0.00379917	0.00318632
South Asia	Pakistan	Jute	Fibre Crops	12	2.3775	2.853e-05	0.5434	0.1432	0.1201	1.55032e-05	4.0855e-06	3.42645e-06
Latin America	Peru	Jute	Fibre Crops	263	2.3775	0.000625283	0.5434	0.1432	0.1201	0.000339779	8.95405e-05	7.50964e-05
South East Asia	Thailand	Jute	Fibre Crops	270	2.3775	0.000641925	0.5434	0.1432	0.1201	0.000348822	9.19237e-05	7.70952e-05
Central & West Asia	Uzbekistan	Jute	Fibre Crops	15939	2.3775	0.037895	0.5434	0.1432	0.1201	0.0205921	0.00542656	0.00455119
South East Asia	Viet Nam	Jute	Fibre Crops	532	2.3775	0.00126483	0.5434	0.1432	0.1201	0.000687309	0.000181124	0.000151906
Africa		Jute	Fibre Crops	8472	2.3775	0.0201422	0.5434	0.1432	0.1201	0.0109453	0.00288436	0.00241908
World		Jute	Fibre Crops	3633550	2.3775	8.63877	0.5434	0.1432	0.1201	4.6943	1.23707	1.03752
South Asia	Afghanistan	Linseed	Fibre Crops	1486	2.3775	0.00353297	0.5434	0.1432	0.1201	0.00191981	0.000505921	0.000424309
Latin America	Argentina	Linseed	Fibre Crops	19515	2.3775	0.0463969	0.5434	0.1432	0.1201	0.0252121	0.00664404	0.00557227
Central & West Asia	Armenia	Linseed	Fibre Crops	546	2.3775	0.00129812	0.5434	0.1432	0.1201	0.000705396	0.00018589	0.000155904
Central & West Asia	Azerbaijan	Linseed	Fibre Crops		2.3775	0	0.5434	0.1432	0.1201	0	0	0
South Asia	Bangladesh	Linseed	Fibre Crops	4464	2.3775	0.0106132	0.5434	0.1432	0.1201	0.00576719	0.0015198	0.00127464
Latin America	Bolivia (Plurinational State of)	Linseed	Fibre Crops	65	2.3775	0.000154537	0.5434	0.1432	0.1201	8.39757e-05	2.21298e-05	1.856e-05
Latin America	Brazil	Linseed	Fibre Crops	5972	2.3775	0.0141984	0.5434	0.1432	0.1201	0.00771543	0.00203322	0.00170523
North America	Canada	Linseed	Fibre Crops	688784	2.3775	1.63758	0.5434	0.1432	0.1201	0.889863	0.234502	0.196674
Latin America	Chile	Linseed	Fibre Crops	1362	2.3775	0.00323815	0.5434	0.1432	0.1201	0.00175961	0.000463704	0.000388902
East Asia	China	Linseed	Fibre Crops	365511	2.3775	0.869002	0.5434	0.1432	0.1201	0.472216	0.124441	0.104367
Latin America	Ecuador	Linseed	Fibre Crops	61	2.3775	0.000145028	0.5434	0.1432	0.1201	7.88079e-05	2.07679e-05	1.74178e-05
South Asia	India	Linseed	Fibre Crops	174000	2.3775	0.413685	0.5434	0.1432	0.1201	0.224796	0.0592397	0.0496836
Central & West Asia	Iran	Linseed	Fibre Crops	9	2.3775	2.13975e-05	0.5434	0.1432	0.1201	1.16274e-05	3.06412e-06	2.56984e-06
Central & West Asia	Iraq	Linseed	Fibre Crops	140	2.3775	0.00033285	0.5434	0.1432	0.1201	0.000180871	4.76641e-05	3.99753e-05
East Asia	Japan	Linseed	Fibre Crops		2.3775	0	0.5434	0.1432	0.1201	0	0	0
Central & West Asia	Kazakhstan	Linseed	Fibre Crops	933533	2.3775	2.21947	0.5434	0.1432	0.1201	1.20606	0.317829	0.266559
Central & West Asia	Kyrgyzstan	Linseed	Fibre Crops	67	2.3775	0.000159292	0.5434	0.1432	0.1201	8.65595e-05	2.28107e-05	1.9131e-05
Latin America	Mexico	Linseed	Fibre Crops	2000	2.3775	0.004755	0.5434	0.1432	0.1201	0.00258387	0.000680916	0.000571075
South Asia	Nepal	Linseed	Fibre Crops	14816	2.3775	0.035225	0.5434	0.1432	0.1201	0.0191413	0.00504423	0.00423053
South Asia	Pakistan	Linseed	Fibre Crops	2053	2.3775	0.00488101	0.5434	0.1432	0.1201	0.00265234	0.00069896	0.000586209
Latin America	Peru	Linseed	Fibre Crops	880	2.3775	0.0020922	0.5434	0.1432	0.1201	0.0011369	0.000299603	0.000251273
Central & West Asia	Tajikistan	Linseed	Fibre Crops		2.3775	0	0.5434	0.1432	0.1201	0	0	0
Central & West Asia	Turkey	Linseed	Fibre Crops	0	2.3775	0	0.5434	0.1432	0.1201	0	0	0
Central & West Asia	Turkmenistan	Linseed	Fibre Crops		2.3775	0	0.5434	0.1432	0.1201	0	0	0
North America	United States of America	Linseed	Fibre Crops	121540	2.3775	0.288961	0.5434	0.1432	0.1201	0.157022	0.0413793	0.0347043
Latin America	Uruguay	Linseed	Fibre Crops	3719	2.3775	0.00884192	0.5434	0.1432	0.1201	0.0048047	0.00126616	0.00106191
Central & West Asia	Uzbekistan	Linseed	Fibre Crops	1000	2.3775	0.0023775	0.5434	0.1432	0.1201	0.00129193	0.000340458	0.000285538
Pacific		Linseed	Fibre Crops	8545	2.3775	0.0203157	0.5434	0.1432	0.1201	0.0110396	0.00290921	0.00243992
Europe		Linseed	Fibre Crops	721233	2.3775	1.71473	0.5434	0.1432	0.1201	0.931785	0.24555	0.205939
Africa		Linseed	Fibre Crops	111452	2.3775	0.264977	0.5434	0.1432	0.1201	0.143989	0.0379447	0.0318238
World		Linseed	Fibre Crops	3182754	2.3775	7.567	0.5434	0.1432	0.1201	4.11191	1.08359	0.908796
Latin America	Costa Rica	Manila fibre (abaca)	Fibre Crops	1213	2.3775	0.00288391	0.5434	0.1432	0.1201	0.00156712	0.000412976	0.000346357
Latin America	Ecuador	Manila fibre (abaca)	Fibre Crops	39155	2.3775	0.093091	0.5434	0.1432	0.1201	0.0505857	0.0133306	0.0111802
South East Asia	Indonesia	Manila fibre (abaca)	Fibre Crops	366	2.3775	0.000870165	0.5434	0.1432	0.1201	0.000472848	0.000124608	0.000104507
South East Asia	Malaysia	Manila fibre (abaca)	Fibre Crops		2.3775	0	0.5434	0.1432	0.1201	0	0	0
South East Asia	Philippines	Manila fibre (abaca)	Fibre Crops	67150	2.3775	0.159649	0.5434	0.1432	0.1201	0.0867533	0.0228618	0.0191739
Africa		Manila fibre (abaca)	Fibre Crops	246	2.3775	0.000584865	0.5434	0.1432	0.1201	0.000317816	8.37527e-05	7.02423e-05
World		Manila fibre (abaca)	Fibre Crops	108131	2.3775	0.257081	0.5434	0.1432	0.1201	0.139698	0.0368141	0.0308755
Latin America	Brazil	Ramie	Fibre Crops	0	2.3775	0	0.5434	0.1432	0.1201	0	0	0
East Asia	China	Ramie	Fibre Crops	104125	2.3775	0.247557	0.5434	0.1432	0.1201	0.134523	0.0354502	0.0297316
East Asia	Taiwan	Ramie	Fibre Crops	0	2.3775	0	0.5434	0.1432	0.1201	0	0	0
East Asia	Japan	Ramie	Fibre Crops		2.3775	0	0.5434	0.1432	0.1201	0	0	0
South East Asia	Laos	Ramie	Fibre Crops	2629	2.3775	0.00625045	0.5434	0.1432	0.1201	0.00339649	0.000895064	0.000750679
South East Asia	Philippines	Ramie	Fibre Crops	0	2.3775	0	0.5434	0.1432	0.1201	0	0	0
East Asia	Republic of Korea	Ramie	Fibre Crops		2.3775	0	0.5434	0.1432	0.1201	0	0	0
South East Asia	Thailand	Ramie	Fibre Crops		2.3775	0	0.5434	0.1432	0.1201	0	0	0
World		Ramie	Fibre Crops	106753	2.3775	0.253805	0.5434	0.1432	0.1201	0.137918	0.0363449	0.030482
South Asia	Bangladesh	Rubber, natural	Fibre Crops	6878	2.3775	0.0163524	0.5434	0.1432	0.1201	0.00888592	0.00234167	0.00196393
Latin America	Bolivia (Plurinational State of)	Rubber, natural	Fibre Crops	19691	2.3775	0.0468154	0.5434	0.1432	0.1201	0.0254395	0.00670396	0.00562252
Latin America	Brazil	Rubber, natural	Fibre Crops	199870	2.3775	0.475191	0.5434	0.1432	0.1201	0.258219	0.0680473	0.0570704
South East Asia	Brunei	Rubber, natural	Fibre Crops	255	2.3775	0.000606262	0.5434	0.1432	0.1201	0.000329443	8.68168e-05	7.28121e-05
South East Asia	Cambodia	Rubber, natural	Fibre Crops	21872	2.3775	0.0520007	0.5434	0.1432	0.1201	0.0282572	0.0074465	0.00624528
East Asia	China	Rubber, natural	Fibre Crops	824000	2.3775	1.95906	0.5434	0.1432	0.1201	1.06455	0.280537	0.235283
Latin America	Colombia	Rubber, natural	Fibre Crops		2.3775	0	0.5434	0.1432	0.1201	0	0	0
Latin America	Costa Rica	Rubber, natural	Fibre Crops		2.3775	0	0.5434	0.1432	0.1201	0	0	0
Latin America	Ecuador	Rubber, natural	Fibre Crops	20584	2.3775	0.0489385	0.5434	0.1432	0.1201	0.0265932	0.00700799	0.00587751
Latin America	Guatemala	Rubber, natural	Fibre Crops	349546	2.3775	0.831046	0.5434	0.1432	0.1201	0.45159	0.119006	0.0998086
South Asia	India	Rubber, natural	Fibre Crops	978317	2.3775	2.32595	0.5434	0.1432	0.1201	1.26392	0.333076	0.279346
South East Asia	Indonesia	Rubber, natural	Fibre Crops	3630268	2.3775	8.63096	0.5434	0.1432	0.1201	4.69006	1.23595	1.03658
South East Asia	Malaysia	Rubber, natural	Fibre Crops	781996	2.3775	1.8592	0.5434	0.1432	0.1201	1.01029	0.266237	0.223289
Latin America	Mexico	Rubber, natural	Fibre Crops	75923	2.3775	0.180507	0.5434	0.1432	0.1201	0.0980875	0.0258486	0.0216789
South East Asia	Myanmar	Rubber, natural	Fibre Crops	212949	2.3775	0.506286	0.5434	0.1432	0.1201	0.275116	0.0725002	0.060805
Latin America	Peru	Rubber, natural	Fibre Crops		2.3775	0	0.5434	0.1432	0.1201	0	0	0
South East Asia	Philippines	Rubber, natural	Fibre Crops	423371	2.3775	1.00656	0.5434	0.1432	0.1201	0.546967	0.14414	0.120888
South East Asia	Singapore	Rubber, natural	Fibre Crops		2.3775	0	0.5434	0.1432	0.1201	0	0	0
South Asia	Sri Lanka	Rubber, natural	Fibre Crops	82560	2.3775	0.196286	0.5434	0.1432	0.1201	0.106662	0.0281082	0.023574
South East Asia	Thailand	Rubber, natural	Fibre Crops	4744250	2.3775	11.2795	0.5434	0.1432	0.1201	6.12926	1.61522	1.35466
South East Asia	Timor-Leste	Rubber, natural	Fibre Crops		2.3775	0	0.5434	0.1432	0.1201	0	0	0
South East Asia	Viet Nam	Rubber, natural	Fibre Crops	1137725	2.3775	2.70494	0.5434	0.1432	0.1201	1.46987	0.387348	0.324863
Pacific		Rubber, natural	Fibre Crops	#VALUE!	2.3775	#VALUE!	0.5434	0.1432	0.1201	#VALUE!	#VALUE!	#VALUE!
Africa		Rubber, natural	Fibre Crops	816985	2.3775	1.94238	0.5434	0.1432	0.1201	1.05549	0.278149	0.23328
Caribbean		Rubber, natural	Fibre Crops	62	2.3775	0.000147405	0.5434	0.1432	0.1201	8.00999e-05	2.11084e-05	1.77033e-05
World		Rubber, natural	Fibre Crops	14334823	2.3775	34.081	0.5434	0.1432	0.1201	18.5196	4.88041	4.09313
South Asia	Afghanistan	Seed cotton	Fibre Crops	39496	2.3775	0.0939017	0.5434	0.1432	0.1201	0.0510262	0.0134467	0.0112776
Latin America	Argentina	Seed cotton	Fibre Crops	813692	2.3775	1.93455	0.5434	0.1432	0.1201	1.05124	0.277028	0.23234
Central & West Asia	Armenia	Seed cotton	Fibre Crops		2.3775	0	0.5434	0.1432	0.1201	0	0	0
Central & West Asia	Azerbaijan	Seed cotton	Fibre Crops	233592	2.3775	0.555365	0.5434	0.1432	0.1201	0.301785	0.0795283	0.0666993
South Asia	Bangladesh	Seed cotton	Fibre Crops	56809	2.3775	0.135063	0.5434	0.1432	0.1201	0.0733935	0.0193411	0.0162211
Latin America	Bolivia (Plurinational State of)	Seed cotton	Fibre Crops	117000	2.3775	0.278168	0.5434	0.1432	0.1201	0.151156	0.0398336	0.0334079
Latin America	Brazil	Seed cotton	Fibre Crops	4956044	2.3775	11.783	0.5434	0.1432	0.1201	6.40288	1.68732	1.41514
South East Asia	Cambodia	Seed cotton	Fibre Crops	242	2.3775	0.000575355	0.5434	0.1432	0.1201	0.000312648	8.23908e-05	6.91001e-05
East Asia	China	Seed cotton	Fibre Crops	17711962	2.3775	42.1102	0.5434	0.1432	0.1201	22.8827	6.03018	5.05743
East Asia	Taiwan	Seed cotton	Fibre Crops		2.3775	0	0.5434	0.1432	0.1201	0	0	0
Latin America	Colombia	Seed cotton	Fibre Crops	74247	2.3775	0.176522	0.5434	0.1432	0.1201	0.0959222	0.025278	0.0212003
Latin America	Costa Rica	Seed cotton	Fibre Crops	640	2.3775	0.0015216	0.5434	0.1432	0.1201	0.000826837	0.000217893	0.000182744
East Asia	Democratic People's Republic of Korea	Seed cotton	Fibre Crops	39218	2.3775	0.0932408	0.5434	0.1432	0.1201	0.050667	0.0133521	0.0111982
Latin America	Ecuador	Seed cotton	Fibre Crops	3660	2.3775	0.00870165	0.5434	0.1432	0.1201	0.00472848	0.00124608	0.00104507
Latin America	El Salvador	Seed cotton	Fibre Crops	110	2.3775	0.000261525	0.5434	0.1432	0.1201	0.000142113	3.74504e-05	3.14092e-05
Central & West Asia	Georgia	Seed cotton	Fibre Crops		2.3775	0	0.5434	0.1432	0.1201	0	0	0
Latin America	Guatemala	Seed cotton	Fibre Crops	2460	2.3775	0.00584865	0.5434	0.1432	0.1201	0.00317816	0.000837527	0.000702423
Latin America	Honduras	Seed cotton	Fibre Crops	3395	2.3775	0.00807161	0.5434	0.1432	0.1201	0.00438611	0.00115585	0.000969401
South Asia	India	Seed cotton	Fibre Crops	14657000	2.3775	34.847	0.5434	0.1432	0.1201	18.9359	4.99009	4.18513
South East Asia	Indonesia	Seed cotton	Fibre Crops	417	2.3775	0.000991418	0.5434	0.1432	0.1201	0.000538736	0.000141971	0.000119069
Central & West Asia	Iran	Seed cotton	Fibre Crops	152454	2.3775	0.362459	0.5434	0.1432	0.1201	0.19696	0.0519042	0.0435314
Central & West Asia	Iraq	Seed cotton	Fibre Crops	31897	2.3775	0.0758351	0.5434	0.1432	0.1201	0.0412088	0.0108596	0.0091078
Central & West Asia	Israel	Seed cotton	Fibre Crops	23300	2.3775	0.0553958	0.5434	0.1432	0.1201	0.0301021	0.00793267	0.00665303
Central & West Asia	Kazakhstan	Seed cotton	Fibre Crops	343619	2.3775	0.816954	0.5434	0.1432	0.1201	0.443933	0.116988	0.0981162
Central & West Asia	Kyrgyzstan	Seed cotton	Fibre Crops	74718	2.3775	0.177642	0.5434	0.1432	0.1201	0.0965307	0.0254383	0.0213348
South East Asia	Laos	Seed cotton	Fibre Crops	6600	2.3775	0.0156915	0.5434	0.1432	0.1201	0.00852676	0.00224702	0.00188455
Latin America	Mexico	Seed cotton	Fibre Crops	1162603	2.3775	2.76409	0.5434	0.1432	0.1201	1.50201	0.395817	0.331967
South East Asia	Myanmar	Seed cotton	Fibre Crops	313339	2.3775	0.744963	0.5434	0.1432	0.1201	0.404813	0.106679	0.0894701
South Asia	Nepal	Seed cotton	Fibre Crops	123	2.3775	0.000292433	0.5434	0.1432	0.1201	0.000158908	4.18763e-05	3.51211e-05
Latin America	Nicaragua	Seed cotton	Fibre Crops	4890	2.3775	0.011626	0.5434	0.1432	0.1201	0.00631755	0.00166484	0.00139628
South Asia	Pakistan	Seed cotton	Fibre Crops	4828439	2.3775	11.4796	0.5434	0.1432	0.1201	6.23802	1.64388	1.3787
Latin America	Paraguay	Seed cotton	Fibre Crops	18986	2.3775	0.0451392	0.5434	0.1432	0.1201	0.0245286	0.00646394	0.00542122
Latin America	Peru	Seed cotton	Fibre Crops	44195	2.3775	0.105074	0.5434	0.1432	0.1201	0.057097	0.0150465	0.0126193
South East Asia	Philippines	Seed cotton	Fibre Crops	7	2.3775	1.66425e-05	0.5434	0.1432	0.1201	9.04353e-06	2.38321e-06	1.99876e-06
East Asia	Republic of Korea	Seed cotton	Fibre Crops		2.3775	0	0.5434	0.1432	0.1201	0	0	0
South Asia	Sri Lanka	Seed cotton	Fibre Crops	0	2.3775	0	0.5434	0.1432	0.1201	0	0	0
Central & West Asia	Syria	Seed cotton	Fibre Crops	90800	2.3775	0.215877	0.5434	0.1432	0.1201	0.117308	0.0309136	0.0259268
Central & West Asia	Tajikistan	Seed cotton	Fibre Crops	300342	2.3775	0.714063	0.5434	0.1432	0.1201	0.388022	0.102254	0.085759
South East Asia	Thailand	Seed cotton	Fibre Crops	2994	2.3775	0.00711823	0.5434	0.1432	0.1201	0.00386805	0.00101933	0.0008549
Central & West Asia	Turkey	Seed cotton	Fibre Crops	2570000	2.3775	6.11017	0.5434	0.1432	0.1201	3.32027	0.874977	0.733832
Central & West Asia	Turkmenistan	Seed cotton	Fibre Crops	618200	2.3775	1.46977	0.5434	0.1432	0.1201	0.798673	0.210471	0.176519
North America	United States of America	Seed cotton	Fibre Crops	11429937	2.3775	27.1747	0.5434	0.1432	0.1201	14.7667	3.89141	3.26368
Latin America	Uruguay	Seed cotton	Fibre Crops		2.3775	0	0.5434	0.1432	0.1201	0	0	0
Central & West Asia	Uzbekistan	Seed cotton	Fibre Crops	2293039	2.3775	5.4517	0.5434	0.1432	0.1201	2.96245	0.780683	0.654749
Latin America	Venezuela (Bolivarian Republic of)	Seed cotton	Fibre Crops	6457	2.3775	0.0153515	0.5434	0.1432	0.1201	0.00834201	0.00219834	0.00184372
South East Asia	Viet Nam	Seed cotton	Fibre Crops	330	2.3775	0.000784575	0.5434	0.1432	0.1201	0.000426338	0.000112351	9.42275e-05
Central & West Asia	Yemen	Seed cotton	Fibre Crops	12570	2.3775	0.0298852	0.5434	0.1432	0.1201	0.0162396	0.00427956	0.00358921
Pacific		Seed cotton	Fibre Crops	#VALUE!	2.3775	#VALUE!	0.5434	0.1432	0.1201	#VALUE!	#VALUE!	#VALUE!
Europe		Seed cotton	Fibre Crops	996637	2.3775	2.3695	0.5434	0.1432	0.1201	1.28759	0.339313	0.284577
Africa		Seed cotton	Fibre Crops	4491964	2.3775	10.6796	0.5434	0.1432	0.1201	5.80332	1.52933	1.28263
Caribbean		Seed cotton	Fibre Crops	933	2.3775	0.00221821	0.5434	0.1432	0.1201	0.00120537	0.000317647	0.000266407
World		Seed cotton	Fibre Crops	71029354	2.3775	168.872	0.5434	0.1432	0.1201	91.7652	24.1825	20.2816
Latin America	Brazil	Sisal	Fibre Crops	80042	2.3775	0.1903	0.5434	0.1432	0.1201	0.103409	0.0272509	0.022855
East Asia	China	Sisal	Fibre Crops	12989	2.3775	0.0308813	0.5434	0.1432	0.1201	0.0167809	0.00442221	0.00370885
East Asia	Taiwan	Sisal	Fibre Crops	3	2.3775	7.1325e-06	0.5434	0.1432	0.1201	3.8758e-06	1.02137e-06	8.56613e-07
Latin America	Guatemala	Sisal	Fibre Crops		2.3775	0	0.5434	0.1432	0.1201	0	0	0
South East Asia	Indonesia	Sisal	Fibre Crops	356	2.3775	0.00084639	0.5434	0.1432	0.1201	0.000459928	0.000121203	0.000101651
Latin America	Mexico	Sisal	Fibre Crops	9008	2.3775	0.0214165	0.5434	0.1432	0.1201	0.0116377	0.00306685	0.00257212
South East Asia	Thailand	Sisal	Fibre Crops	13	2.3775	3.09075e-05	0.5434	0.1432	0.1201	1.67951e-05	4.42595e-06	3.71199e-06
Latin America	Venezuela (Bolivarian Republic of)	Sisal	Fibre Crops	2407	2.3775	0.00572264	0.5434	0.1432	0.1201	0.00310968	0.000819482	0.000687289
Africa		Sisal	Fibre Crops	80379	2.3775	0.191101	0.5434	0.1432	0.1201	0.103844	0.0273657	0.0229512
Caribbean		Sisal	Fibre Crops	13115	2.3775	0.0311809	0.5434	0.1432	0.1201	0.0169437	0.00446511	0.00374483
World		Sisal	Fibre Crops	198309	2.3775	0.47148	0.5434	0.1432	0.1201	0.256202	0.0675159	0.0566247
Central & West Asia	Armenia	Vetches	Fodder		1.75	0	0.3451	0.2392	0.1356	0	0	0
Central & West Asia	Iraq	Vetches	Fodder	771	1.75	0.00134925	0.3451	0.2392	0.1356	0.000465626	0.000322741	0.000182958
Central & West Asia	Israel	Vetches	Fodder		1.75	0	0.3451	0.2392	0.1356	0	0	0
Central & West Asia	Jordan	Vetches	Fodder	6749	1.75	0.0118108	0.3451	0.2392	0.1356	0.00407589	0.00282513	0.00160154
Central & West Asia	Kazakhstan	Vetches	Fodder		1.75	0	0.3451	0.2392	0.1356	0	0	0
Central & West Asia	Lebanon	Vetches	Fodder	829	1.75	0.00145075	0.3451	0.2392	0.1356	0.000500654	0.000347019	0.000196722
Latin America	Mexico	Vetches	Fodder	93966	1.75	0.16444	0.3451	0.2392	0.1356	0.0567484	0.0393342	0.0222981
Central & West Asia	Palestine	Vetches	Fodder	4971	1.75	0.00869925	0.3451	0.2392	0.1356	0.00300211	0.00208086	0.00117962
Central & West Asia	Syria	Vetches	Fodder	12147	1.75	0.0212572	0.3451	0.2392	0.1356	0.00733588	0.00508473	0.00288248
Central & West Asia	Turkey	Vetches	Fodder	54399	1.75	0.0951982	0.3451	0.2392	0.1356	0.0328529	0.0227714	0.0129089
Pacific		Vetches	Fodder	#VALUE!	1.75	#VALUE!	0.3451	0.2392	0.1356	#VALUE!	#VALUE!	#VALUE!
Europe		Vetches	Fodder	395186	1.75	0.691576	0.3451	0.2392	0.1356	0.238663	0.165425	0.0937776
Africa		Vetches	Fodder	353206	1.75	0.618111	0.3451	0.2392	0.1356	0.21331	0.147852	0.0838158
World		Vetches	Fodder	934390	1.75	1.63518	0.3451	0.2392	0.1356	0.564301	0.391136	0.221731
South Asia	Afghanistan	Apples	Fruits & Berries	217192	1.5	0.325788	0.2078	0.2444	0.2659	0.0676987	0.0796226	0.086627
Latin America	Argentina	Apples	Fruits & Berries	510478	1.5	0.765717	0.2078	0.2444	0.2659	0.159116	0.187141	0.203604
Central & West Asia	Armenia	Apples	Fruits & Berries	109939	1.5	0.164909	0.2078	0.2444	0.2659	0.034268	0.0403036	0.0438492
Central & West Asia	Azerbaijan	Apples	Fruits & Berries	277158	1.5	0.415737	0.2078	0.2444	0.2659	0.0863901	0.101606	0.110544
South Asia	Bhutan	Apples	Fruits & Berries	8632	1.5	0.012948	0.2078	0.2444	0.2659	0.00269059	0.00316449	0.00344287
Latin America	Bolivia (Plurinational State of)	Apples	Fruits & Berries	2805	1.5	0.0042075	0.2078	0.2444	0.2659	0.000874319	0.00102831	0.00111877
Latin America	Brazil	Apples	Fruits & Berries	1195007	1.5	1.79251	0.2078	0.2444	0.2659	0.372484	0.43809	0.476629
North America	Canada	Apples	Fruits & Berries	424709	1.5	0.637064	0.2078	0.2444	0.2659	0.132382	0.155698	0.169395
Latin America	Chile	Apples	Fruits & Berries	1727277	1.5	2.59092	0.2078	0.2444	0.2659	0.538392	0.63322	0.688924
East Asia	China	Apples	Fruits & Berries	39235019	1.5	58.8525	0.2078	0.2444	0.2659	12.2296	14.3836	15.6489
East Asia	Taiwan	Apples	Fruits & Berries	1619	1.5	0.0024285	0.2078	0.2444	0.2659	0.000504642	0.000593525	0.000645738
Latin America	Colombia	Apples	Fruits & Berries	2368	1.5	0.003552	0.2078	0.2444	0.2659	0.000738106	0.000868109	0.000944477
East Asia	Democratic People's Republic of Korea	Apples	Fruits & Berries	813064	1.5	1.2196	0.2078	0.2444	0.2659	0.253432	0.298069	0.324291
Latin America	Ecuador	Apples	Fruits & Berries	6970	1.5	0.010455	0.2078	0.2444	0.2659	0.00217255	0.0025552	0.00277998
Latin America	El Salvador	Apples	Fruits & Berries	34960	1.5	0.05244	0.2078	0.2444	0.2659	0.010897	0.0128163	0.0139438
Central & West Asia	Georgia	Apples	Fruits & Berries	82700	1.5	0.12405	0.2078	0.2444	0.2659	0.0257776	0.0303178	0.0329849
Latin America	Guatemala	Apples	Fruits & Berries	24800	1.5	0.0372	0.2078	0.2444	0.2659	0.00773016	0.00909168	0.00989148
Latin America	Honduras	Apples	Fruits & Berries	189	1.5	0.0002835	0.2078	0.2444	0.2659	5.89113e-05	6.92874e-05	7.53827e-05
South Asia	India	Apples	Fruits & Berries	2327000	1.5	3.4905	0.2078	0.2444	0.2659	0.725326	0.853078	0.928124
Central & West Asia	Iran	Apples	Fruits & Berries	2519249	1.5	3.77887	0.2078	0.2444	0.2659	0.78525	0.923557	1.0048
Central & West Asia	Iraq	Apples	Fruits & Berries	49813	1.5	0.0747195	0.2078	0.2444	0.2659	0.0155267	0.0182614	0.0198679
Central & West Asia	Israel	Apples	Fruits & Berries	111000	1.5	0.1665	0.2078	0.2444	0.2659	0.0345987	0.0406926	0.0442724
East Asia	Japan	Apples	Fruits & Berries	756100	1.5	1.13415	0.2078	0.2444	0.2659	0.235676	0.277186	0.30157
Central & West Asia	Jordan	Apples	Fruits & Berries	42394	1.5	0.063591	0.2078	0.2444	0.2659	0.0132142	0.0155416	0.0169088
Central & West Asia	Kazakhstan	Apples	Fruits & Berries	222482	1.5	0.333723	0.2078	0.2444	0.2659	0.0693476	0.0815619	0.0887369
Central & West Asia	Kyrgyzstan	Apples	Fruits & Berries	144889	1.5	0.217334	0.2078	0.2444	0.2659	0.0451619	0.0531163	0.057789
Central & West Asia	Lebanon	Apples	Fruits & Berries	124464	1.5	0.186696	0.2078	0.2444	0.2659	0.0387954	0.0456285	0.0496425
Latin America	Mexico	Apples	Fruits & Berries	659692	1.5	0.989538	0.2078	0.2444	0.2659	0.205626	0.241843	0.263118
South Asia	Nepal	Apples	Fruits & Berries	28895	1.5	0.0433425	0.2078	0.2444	0.2659	0.00900657	0.0105929	0.0115248
South Asia	Pakistan	Apples	Fruits & Berries	545875	1.5	0.818813	0.2078	0.2444	0.2659	0.170149	0.200118	0.217722
Central & West Asia	Palestine	Apples	Fruits & Berries	877	1.5	0.0013155	0.2078	0.2444	0.2659	0.000273361	0.000321508	0.000349791
Latin America	Paraguay	Apples	Fruits & Berries	511	1.5	0.0007665	0.2078	0.2444	0.2659	0.000159279	0.000187333	0.000203812
Latin America	Peru	Apples	Fruits & Berries	140569	1.5	0.210853	0.2078	0.2444	0.2659	0.0438154	0.0515326	0.0560659
East Asia	Republic of Korea	Apples	Fruits & Berries	475303	1.5	0.712955	0.2078	0.2444	0.2659	0.148152	0.174246	0.189575
Central & West Asia	Syria	Apples	Fruits & Berries	352504	1.5	0.528756	0.2078	0.2444	0.2659	0.109875	0.129228	0.140596
Central & West Asia	Tajikistan	Apples	Fruits & Berries	238651	1.5	0.357976	0.2078	0.2444	0.2659	0.0743875	0.0874895	0.095186
Central & West Asia	Turkey	Apples	Fruits & Berries	3625960	1.5	5.43894	0.2078	0.2444	0.2659	1.13021	1.32928	1.44621
Central & West Asia	Turkmenistan	Apples	Fruits & Berries	63398	1.5	0.095097	0.2078	0.2444	0.2659	0.0197612	0.0232417	0.0252863
North America	United States of America	Apples	Fruits & Berries	4652500	1.5	6.97875	0.2078	0.2444	0.2659	1.45018	1.70561	1.85565
Latin America	Uruguay	Apples	Fruits & Berries	48434	1.5	0.072651	0.2078	0.2444	0.2659	0.0150969	0.0177559	0.0193179
Central & West Asia	Uzbekistan	Apples	Fruits & Berries	1130335	1.5	1.6955	0.2078	0.2444	0.2659	0.352325	0.414381	0.450834
Central & West Asia	Yemen	Apples	Fruits & Berries	16931	1.5	0.0253965	0.2078	0.2444	0.2659	0.00527739	0.0062069	0.00675293
Pacific		Apples	Fruits & Berries	722266	1.5	1.0834	0.2078	0.2444	0.2659	0.22513	0.264783	0.288076
Europe		Apples	Fruits & Berries	19593609	1.5	29.3904	0.2078	0.2444	0.2659	6.10733	7.18302	7.81491
Africa		Apples	Fruits & Berries	2869177	1.5	4.30377	0.2078	0.2444	0.2659	0.894322	1.05184	1.14437
Caribbean		Apples	Fruits & Berries	2283	1.5	0.0034245	0.2078	0.2444	0.2659	0.000711611	0.000836948	0.000910575
World		Apples	Fruits & Berries	86142197	1.5	129.213	0.2078	0.2444	0.2659	26.8505	31.5797	34.3578
South Asia	Afghanistan	Apricots	Fruits & Berries	18510	1.5	0.027765	0.2078	0.2444	0.2659	0.00576957	0.00678577	0.00738271
Latin America	Argentina	Apricots	Fruits & Berries	26935	1.5	0.0404025	0.2078	0.2444	0.2659	0.00839564	0.00987437	0.010743
Central & West Asia	Armenia	Apricots	Fruits & Berries	104035	1.5	0.156053	0.2078	0.2444	0.2659	0.0324277	0.0381392	0.0414944
Central & West Asia	Azerbaijan	Apricots	Fruits & Berries	28566	1.5	0.042849	0.2078	0.2444	0.2659	0.00890402	0.0104723	0.0113935
South Asia	Bhutan	Apricots	Fruits & Berries		1.5	0	0.2078	0.2444	0.2659	0	0	0
North America	Canada	Apricots	Fruits & Berries	1175	1.5	0.0017625	0.2078	0.2444	0.2659	0.000366247	0.000430755	0.000468649
Latin America	Chile	Apricots	Fruits & Berries	6757	1.5	0.0101355	0.2078	0.2444	0.2659	0.00210616	0.00247712	0.00269503
East Asia	China	Apricots	Fruits & Berries	76193	1.5	0.11429	0.2078	0.2444	0.2659	0.0237494	0.0279324	0.0303896
East Asia	Taiwan	Apricots	Fruits & Berries	17382	1.5	0.026073	0.2078	0.2444	0.2659	0.00541797	0.00637224	0.00693281
Latin America	Ecuador	Apricots	Fruits & Berries	374	1.5	0.000561	0.2078	0.2444	0.2659	0.000116576	0.000137108	0.00014917
Central & West Asia	Georgia	Apricots	Fruits & Berries	900	1.5	0.00135	0.2078	0.2444	0.2659	0.00028053	0.00032994	0.000358965
South Asia	India	Apricots	Fruits & Berries	15958	1.5	0.023937	0.2078	0.2444	0.2659	0.00497411	0.0058502	0.00636485
Central & West Asia	Iran	Apricots	Fruits & Berries	342479	1.5	0.513718	0.2078	0.2444	0.2659	0.106751	0.125553	0.136598
Central & West Asia	Iraq	Apricots	Fruits & Berries	16814	1.5	0.025221	0.2078	0.2444	0.2659	0.00524092	0.00616401	0.00670626
Central & West Asia	Israel	Apricots	Fruits & Berries	5000	1.5	0.0075	0.2078	0.2444	0.2659	0.0015585	0.001833	0.00199425
East Asia	Japan	Apricots	Fruits & Berries	112400	1.5	0.1686	0.2078	0.2444	0.2659	0.0350351	0.0412058	0.0448307
Central & West Asia	Jordan	Apricots	Fruits & Berries	12276	1.5	0.018414	0.2078	0.2444	0.2659	0.00382643	0.00450038	0.00489628
Central & West Asia	Kazakhstan	Apricots	Fruits & Berries	20224	1.5	0.030336	0.2078	0.2444	0.2659	0.00630382	0.00741412	0.00806634
Central & West Asia	Kyrgyzstan	Apricots	Fruits & Berries	25702	1.5	0.038553	0.2078	0.2444	0.2659	0.00801131	0.00942235	0.0102512
Central & West Asia	Lebanon	Apricots	Fruits & Berries	20718	1.5	0.031077	0.2078	0.2444	0.2659	0.0064578	0.00759522	0.00826337
Latin America	Mexico	Apricots	Fruits & Berries	980	1.5	0.00147	0.2078	0.2444	0.2659	0.000305466	0.000359268	0.000390873
South Asia	Nepal	Apricots	Fruits & Berries	1820	1.5	0.00273	0.2078	0.2444	0.2659	0.000567294	0.000667212	0.000725907
South Asia	Pakistan	Apricots	Fruits & Berries	128382	1.5	0.192573	0.2078	0.2444	0.2659	0.0400167	0.0470648	0.0512052
Central & West Asia	Palestine	Apricots	Fruits & Berries	1078	1.5	0.001617	0.2078	0.2444	0.2659	0.000336013	0.000395195	0.00042996
Latin America	Peru	Apricots	Fruits & Berries	242	1.5	0.000363	0.2078	0.2444	0.2659	7.54314e-05	8.87172e-05	9.65217e-05
Central & West Asia	Syria	Apricots	Fruits & Berries	32000	1.5	0.048	0.2078	0.2444	0.2659	0.0099744	0.0117312	0.0127632
Central & West Asia	Tajikistan	Apricots	Fruits & Berries	31980	1.5	0.04797	0.2078	0.2444	0.2659	0.00996817	0.0117239	0.0127552
Central & West Asia	Turkey	Apricots	Fruits & Berries	750000	1.5	1.125	0.2078	0.2444	0.2659	0.233775	0.27495	0.299138
Central & West Asia	Turkmenistan	Apricots	Fruits & Berries	34227	1.5	0.0513405	0.2078	0.2444	0.2659	0.0106686	0.0125476	0.0136514
North America	United States of America	Apricots	Fruits & Berries	35880	1.5	0.05382	0.2078	0.2444	0.2659	0.0111838	0.0131536	0.0143107
Central & West Asia	Uzbekistan	Apricots	Fruits & Berries	493842	1.5	0.740763	0.2078	0.2444	0.2659	0.153931	0.181042	0.196969
Central & West Asia	Yemen	Apricots	Fruits & Berries	1503	1.5	0.0022545	0.2078	0.2444	0.2659	0.000468485	0.000551	0.000599472
Pacific		Apricots	Fruits & Berries	11613	1.5	0.0174195	0.2078	0.2444	0.2659	0.00361977	0.00425733	0.00463185
Europe		Apricots	Fruits & Berries	946126	1.5	1.41919	0.2078	0.2444	0.2659	0.294907	0.34685	0.377362
Africa		Apricots	Fruits & Berries	532760	1.5	0.79914	0.2078	0.2444	0.2659	0.166061	0.19531	0.212491
Caribbean		Apricots	Fruits & Berries	27	1.5	4.05e-05	0.2078	0.2444	0.2659	8.4159e-06	9.8982e-06	1.0769e-05
World		Apricots	Fruits & Berries	3838523	1.5	5.75778	0.2078	0.2444	0.2659	1.19647	1.4072	1.53099
Latin America	Argentina	Avocados	Fruits & Berries	4154	1.5	0.006231	0.2078	0.2444	0.2659	0.0012948	0.00152286	0.00165682
Latin America	Bolivia (Plurinational State of)	Avocados	Fruits & Berries	12452	1.5	0.018678	0.2078	0.2444	0.2659	0.00388129	0.0045649	0.00496648
Latin America	Brazil	Avocados	Fruits & Berries	235788	1.5	0.353682	0.2078	0.2444	0.2659	0.0734951	0.0864399	0.094044
Latin America	Chile	Avocados	Fruits & Berries	124506	1.5	0.186759	0.2078	0.2444	0.2659	0.0388085	0.0456439	0.0496592
East Asia	China	Avocados	Fruits & Berries	128743	1.5	0.193114	0.2078	0.2444	0.2659	0.0401292	0.0471972	0.0513491
Latin America	Colombia	Avocados	Fruits & Berries	326666	1.5	0.489999	0.2078	0.2444	0.2659	0.101822	0.119756	0.130291
Latin America	Costa Rica	Avocados	Fruits & Berries	15000	1.5	0.0225	0.2078	0.2444	0.2659	0.0046755	0.005499	0.00598275
Latin America	Ecuador	Avocados	Fruits & Berries	18232	1.5	0.027348	0.2078	0.2444	0.2659	0.00568291	0.00668385	0.00727183
Latin America	El Salvador	Avocados	Fruits & Berries	18605	1.5	0.0279075	0.2078	0.2444	0.2659	0.00579918	0.00682059	0.0074206
Latin America	French Guyana	Avocados	Fruits & Berries	1491	1.5	0.0022365	0.2078	0.2444	0.2659	0.000464745	0.000546601	0.000594685
Latin America	Guatemala	Avocados	Fruits & Berries	124931	1.5	0.187396	0.2078	0.2444	0.2659	0.038941	0.0457997	0.0498287
Latin America	Guyana	Avocados	Fruits & Berries	8586	1.5	0.012879	0.2078	0.2444	0.2659	0.00267626	0.00314763	0.00342453
Latin America	Honduras	Avocados	Fruits & Berries	1618	1.5	0.002427	0.2078	0.2444	0.2659	0.000504331	0.000593159	0.000645339
South East Asia	Indonesia	Avocados	Fruits & Berries	410094	1.5	0.615141	0.2078	0.2444	0.2659	0.127826	0.15034	0.163566
Central & West Asia	Israel	Avocados	Fruits & Berries	131720	1.5	0.19758	0.2078	0.2444	0.2659	0.0410571	0.0482886	0.0525365
Central & West Asia	Lebanon	Avocados	Fruits & Berries	9383	1.5	0.0140745	0.2078	0.2444	0.2659	0.00292468	0.00343981	0.00374241
Latin America	Mexico	Avocados	Fruits & Berries	2184663	1.5	3.27699	0.2078	0.2444	0.2659	0.680959	0.800897	0.871353
Central & West Asia	Palestine	Avocados	Fruits & Berries	677	1.5	0.0010155	0.2078	0.2444	0.2659	0.000211021	0.000248188	0.000270021
Latin America	Panama	Avocados	Fruits & Berries	8834	1.5	0.013251	0.2078	0.2444	0.2659	0.00275356	0.00323854	0.00352344
Latin America	Paraguay	Avocados	Fruits & Berries	15882	1.5	0.023823	0.2078	0.2444	0.2659	0.00495042	0.00582234	0.00633454
Latin America	Peru	Avocados	Fruits & Berries	504517	1.5	0.756776	0.2078	0.2444	0.2659	0.157258	0.184956	0.201227
South East Asia	Philippines	Avocados	Fruits & Berries	19443	1.5	0.0291645	0.2078	0.2444	0.2659	0.00606038	0.0071278	0.00775484
South Asia	Sri Lanka	Avocados	Fruits & Berries	50542	1.5	0.075813	0.2078	0.2444	0.2659	0.0157539	0.0185287	0.0201587
South East Asia	Timor-Leste	Avocados	Fruits & Berries	4831	1.5	0.0072465	0.2078	0.2444	0.2659	0.00150582	0.00177104	0.00192684
Central & West Asia	Turkey	Avocados	Fruits & Berries	3164	1.5	0.004746	0.2078	0.2444	0.2659	0.000986219	0.00115992	0.00126196
North America	United States of America	Avocados	Fruits & Berries	168528	1.5	0.252792	0.2078	0.2444	0.2659	0.0525302	0.0617824	0.0672174
Latin America	Venezuela (Bolivarian Republic of)	Avocados	Fruits & Berries	139685	1.5	0.209528	0.2078	0.2444	0.2659	0.0435398	0.0512085	0.0557134
Pacific		Avocados	Fruits & Berries	90534	1.5	0.135801	0.2078	0.2444	0.2659	0.0282194	0.0331898	0.0361095
Europe		Avocados	Fruits & Berries	94801	1.5	0.142202	0.2078	0.2444	0.2659	0.0295495	0.034754	0.0378114
Africa		Avocados	Fruits & Berries	802016	1.5	1.20302	0.2078	0.2444	0.2659	0.249988	0.294019	0.319884
Caribbean		Avocados	Fruits & Berries	746373	1.5	1.11956	0.2078	0.2444	0.2659	0.232644	0.27362	0.297691
World		Avocados	Fruits & Berries	6407171	1.5	9.61076	0.2078	0.2444	0.2659	1.99712	2.34887	2.5555
Latin America	Argentina	Bananas	Fruits & Berries	174585	1.5	0.261877	0.2078	0.2444	0.2659	0.0544181	0.0640029	0.0696332
Central & West Asia	Bahrain	Bananas	Fruits & Berries	996	1.5	0.001494	0.2078	0.2444	0.2659	0.000310453	0.000365134	0.000397255
South Asia	Bangladesh	Bananas	Fruits & Berries	810347	1.5	1.21552	0.2078	0.2444	0.2659	0.252585	0.297073	0.323207
Latin America	Belize	Bananas	Fruits & Berries	78692	1.5	0.118038	0.2078	0.2444	0.2659	0.0245283	0.0288485	0.0313863
South Asia	Bhutan	Bananas	Fruits & Berries	3000	1.5	0.0045	0.2078	0.2444	0.2659	0.0009351	0.0010998	0.00119655
Latin America	Bolivia (Plurinational State of)	Bananas	Fruits & Berries	305950	1.5	0.458925	0.2078	0.2444	0.2659	0.0953646	0.112161	0.122028
Latin America	Brazil	Bananas	Fruits & Berries	6752171	1.5	10.1283	0.2078	0.2444	0.2659	2.10465	2.47535	2.6931
South East Asia	Brunei	Bananas	Fruits & Berries	1822	1.5	0.002733	0.2078	0.2444	0.2659	0.000567917	0.000667945	0.000726705
South East Asia	Cambodia	Bananas	Fruits & Berries	144403	1.5	0.216605	0.2078	0.2444	0.2659	0.0450104	0.0529381	0.0575951
East Asia	China	Bananas	Fruits & Berries	11577938	1.5	17.3669	0.2078	0.2444	0.2659	3.60884	4.24447	4.61786
East Asia	Taiwan	Bananas	Fruits & Berries	356238	1.5	0.534357	0.2078	0.2444	0.2659	0.111039	0.130597	0.142086
Latin America	Colombia	Bananas	Fruits & Berries	3707152	1.5	5.56073	0.2078	0.2444	0.2659	1.15552	1.35904	1.4786
Latin America	Costa Rica	Bananas	Fruits & Berries	2528788	1.5	3.79318	0.2078	0.2444	0.2659	0.788223	0.927054	1.00861
Latin America	Ecuador	Bananas	Fruits & Berries	6505635	1.5	9.75845	0.2078	0.2444	0.2659	2.02781	2.38497	2.59477
Latin America	El Salvador	Bananas	Fruits & Berries	17249	1.5	0.0258735	0.2078	0.2444	0.2659	0.00537651	0.00632348	0.00687976
Latin America	French Guyana	Bananas	Fruits & Berries	8000	1.5	0.012	0.2078	0.2444	0.2659	0.0024936	0.0029328	0.0031908
Latin America	Guatemala	Bananas	Fruits & Berries	4026547	1.5	6.03982	0.2078	0.2444	0.2659	1.25507	1.47613	1.60599
Latin America	Guyana	Bananas	Fruits & Berries	16802	1.5	0.025203	0.2078	0.2444	0.2659	0.00523718	0.00615961	0.00670148
Latin America	Honduras	Bananas	Fruits & Berries	671251	1.5	1.00688	0.2078	0.2444	0.2659	0.209229	0.246081	0.267728
South Asia	India	Bananas	Fruits & Berries	30808000	1.5	46.212	0.2078	0.2444	0.2659	9.60285	11.2942	12.2878
South East Asia	Indonesia	Bananas	Fruits & Berries	7264383	1.5	10.8966	0.2078	0.2444	0.2659	2.26431	2.66312	2.8974
Central & West Asia	Iran	Bananas	Fruits & Berries	131170	1.5	0.196755	0.2078	0.2444	0.2659	0.0408857	0.0480869	0.0523172
Central & West Asia	Israel	Bananas	Fruits & Berries	135000	1.5	0.2025	0.2078	0.2444	0.2659	0.0420795	0.049491	0.0538448
East Asia	Japan	Bananas	Fruits & Berries	51	1.5	7.65e-05	0.2078	0.2444	0.2659	1.58967e-05	1.86966e-05	2.03414e-05
Central & West Asia	Jordan	Bananas	Fruits & Berries	42098	1.5	0.063147	0.2078	0.2444	0.2659	0.0131219	0.0154331	0.0167908
Central & West Asia	Kuwait	Bananas	Fruits & Berries		1.5	0	0.2078	0.2444	0.2659	0	0	0
South East Asia	Laos	Bananas	Fruits & Berries	970985	1.5	1.45648	0.2078	0.2444	0.2659	0.302656	0.355963	0.387277
Central & West Asia	Lebanon	Bananas	Fruits & Berries	71625	1.5	0.107438	0.2078	0.2444	0.2659	0.0223255	0.0262577	0.0285676
South East Asia	Malaysia	Bananas	Fruits & Berries	376589	1.5	0.564883	0.2078	0.2444	0.2659	0.117383	0.138058	0.150203
South Asia	Maldives	Bananas	Fruits & Berries	334	1.5	0.000501	0.2078	0.2444	0.2659	0.000104108	0.000122444	0.000133216
Latin America	Mexico	Bananas	Fruits & Berries	2354479	1.5	3.53172	0.2078	0.2444	0.2659	0.733891	0.863152	0.939084
South Asia	Nepal	Bananas	Fruits & Berries	254403	1.5	0.381605	0.2078	0.2444	0.2659	0.0792974	0.0932641	0.101469
Latin America	Nicaragua	Bananas	Fruits & Berries	108832	1.5	0.163248	0.2078	0.2444	0.2659	0.0339229	0.0398978	0.0434076
Central & West Asia	Oman	Bananas	Fruits & Berries	18265	1.5	0.0273975	0.2078	0.2444	0.2659	0.0056932	0.00669595	0.007285
South Asia	Pakistan	Bananas	Fruits & Berries	135056	1.5	0.202584	0.2078	0.2444	0.2659	0.042097	0.0495115	0.0538671
Central & West Asia	Palestine	Bananas	Fruits & Berries	3118	1.5	0.004677	0.2078	0.2444	0.2659	0.000971881	0.00114306	0.00124361
Latin America	Panama	Bananas	Fruits & Berries	274898	1.5	0.412347	0.2078	0.2444	0.2659	0.0856857	0.100778	0.109643
Latin America	Paraguay	Bananas	Fruits & Berries	75868	1.5	0.113802	0.2078	0.2444	0.2659	0.0236481	0.0278132	0.03026
Latin America	Peru	Bananas	Fruits & Berries	134604	1.5	0.201906	0.2078	0.2444	0.2659	0.0419561	0.0493458	0.0536868
South East Asia	Philippines	Bananas	Fruits & Berries	6144374	1.5	9.21656	0.2078	0.2444	0.2659	1.9152	2.25253	2.45068
East Asia	Republic of Korea	Bananas	Fruits & Berries		1.5	0	0.2078	0.2444	0.2659	0	0	0
South East Asia	Singapore	Bananas	Fruits & Berries		1.5	0	0.2078	0.2444	0.2659	0	0	0
South Asia	Sri Lanka	Bananas	Fruits & Berries		1.5	0	0.2078	0.2444	0.2659	0	0	0
Latin America	Suriname	Bananas	Fruits & Berries	48835	1.5	0.0732525	0.2078	0.2444	0.2659	0.0152219	0.0179029	0.0194778
Central & West Asia	Syria	Bananas	Fruits & Berries	154	1.5	0.000231	0.2078	0.2444	0.2659	4.80018e-05	5.64564e-05	6.14229e-05
South East Asia	Thailand	Bananas	Fruits & Berries	1045352	1.5	1.56803	0.2078	0.2444	0.2659	0.325836	0.383226	0.416939
South East Asia	Timor-Leste	Bananas	Fruits & Berries	566	1.5	0.000849	0.2078	0.2444	0.2659	0.000176422	0.000207496	0.000225749
Central & West Asia	Turkey	Bananas	Fruits & Berries	498888	1.5	0.748332	0.2078	0.2444	0.2659	0.155503	0.182892	0.198981
Central & West Asia	United Arab Emirates	Bananas	Fruits & Berries	204	1.5	0.000306	0.2078	0.2444	0.2659	6.35868e-05	7.47864e-05	8.13654e-05
North America	United States of America	Bananas	Fruits & Berries	4274	1.5	0.006411	0.2078	0.2444	0.2659	0.00133221	0.00156685	0.00170468
Latin America	Venezuela (Bolivarian Republic of)	Bananas	Fruits & Berries	448315	1.5	0.672473	0.2078	0.2444	0.2659	0.13974	0.164352	0.17881
South East Asia	Viet Nam	Bananas	Fruits & Berries	2087275	1.5	3.13091	0.2078	0.2444	0.2659	0.650604	0.765195	0.83251
Central & West Asia	Yemen	Bananas	Fruits & Berries	116322	1.5	0.174483	0.2078	0.2444	0.2659	0.0362576	0.0426436	0.046395
Pacific		Bananas	Fruits & Berries	1822643	1.5	2.73396	0.2078	0.2444	0.2659	0.568118	0.668181	0.726961
Europe		Bananas	Fruits & Berries	411275	1.5	0.616912	0.2078	0.2444	0.2659	0.128194	0.150773	0.164037
Africa		Bananas	Fruits & Berries	20418014	1.5	30.627	0.2078	0.2444	0.2659	6.36429	7.48524	8.14372
Caribbean		Bananas	Fruits & Berries	2194500	1.5	3.29175	0.2078	0.2444	0.2659	0.684026	0.804504	0.875276
World		Bananas	Fruits & Berries	115737861	1.5	173.607	0.2078	0.2444	0.2659	36.0755	42.4295	46.162
South Asia	Afghanistan	Berries nes	Fruits & Berries	21776	1.5	0.032664	0.2078	0.2444	0.2659	0.00678758	0.00798308	0.00868536
Central & West Asia	Armenia	Berries nes	Fruits & Berries	12072	1.5	0.018108	0.2078	0.2444	0.2659	0.00376284	0.0044256	0.00481492
Central & West Asia	Azerbaijan	Berries nes	Fruits & Berries	20831	1.5	0.0312465	0.2078	0.2444	0.2659	0.00649302	0.00763664	0.00830844
South Asia	Bangladesh	Berries nes	Fruits & Berries	26796	1.5	0.040194	0.2078	0.2444	0.2659	0.00835231	0.00982341	0.0106876
North America	Canada	Berries nes	Fruits & Berries		1.5	0	0.2078	0.2444	0.2659	0	0	0
East Asia	China	Berries nes	Fruits & Berries	62212	1.5	0.093318	0.2078	0.2444	0.2659	0.0193915	0.0228069	0.0248133
Latin America	Costa Rica	Berries nes	Fruits & Berries	816	1.5	0.001224	0.2078	0.2444	0.2659	0.000254347	0.000299146	0.000325462
Latin America	Ecuador	Berries nes	Fruits & Berries	7038	1.5	0.010557	0.2078	0.2444	0.2659	0.00219374	0.00258013	0.00280711
Central & West Asia	Georgia	Berries nes	Fruits & Berries	600	1.5	0.0009	0.2078	0.2444	0.2659	0.00018702	0.00021996	0.00023931
South Asia	India	Berries nes	Fruits & Berries	2382	1.5	0.003573	0.2078	0.2444	0.2659	0.000742469	0.000873241	0.000950061
Central & West Asia	Iran	Berries nes	Fruits & Berries	11759	1.5	0.0176385	0.2078	0.2444	0.2659	0.00366528	0.00431085	0.00469008
Central & West Asia	Israel	Berries nes	Fruits & Berries	1759	1.5	0.0026385	0.2078	0.2444	0.2659	0.00054828	0.000644849	0.000701577
Central & West Asia	Jordan	Berries nes	Fruits & Berries		1.5	0	0.2078	0.2444	0.2659	0	0	0
Central & West Asia	Kazakhstan	Berries nes	Fruits & Berries	13807	1.5	0.0207105	0.2078	0.2444	0.2659	0.00430364	0.00506165	0.00550692
Central & West Asia	Kyrgyzstan	Berries nes	Fruits & Berries	4110	1.5	0.006165	0.2078	0.2444	0.2659	0.00128109	0.00150673	0.00163927
Latin America	Mexico	Berries nes	Fruits & Berries	287125	1.5	0.430688	0.2078	0.2444	0.2659	0.0894969	0.10526	0.11452
South Asia	Pakistan	Berries nes	Fruits & Berries	1804	1.5	0.002706	0.2078	0.2444	0.2659	0.000562307	0.000661346	0.000719525
Central & West Asia	Turkey	Berries nes	Fruits & Berries	69187	1.5	0.10378	0.2078	0.2444	0.2659	0.0215656	0.025364	0.0275952
North America	United States of America	Berries nes	Fruits & Berries	22860	1.5	0.03429	0.2078	0.2444	0.2659	0.00712546	0.00838048	0.00911771
Central & West Asia	Uzbekistan	Berries nes	Fruits & Berries	1052	1.5	0.001578	0.2078	0.2444	0.2659	0.000327908	0.000385663	0.00041959
South East Asia	Viet Nam	Berries nes	Fruits & Berries	148538	1.5	0.222807	0.2078	0.2444	0.2659	0.0462993	0.054454	0.0592444
Pacific		Berries nes	Fruits & Berries	115437	1.5	0.173155	0.2078	0.2444	0.2659	0.0359817	0.0423192	0.046042
Europe		Berries nes	Fruits & Berries	171844	1.5	0.257766	0.2078	0.2444	0.2659	0.0535638	0.062998	0.06854
Africa		Berries nes	Fruits & Berries	6106	1.5	0.009159	0.2078	0.2444	0.2659	0.00190324	0.00223846	0.00243538
World		Berries nes	Fruits & Berries	1009912	1.5	1.51487	0.2078	0.2444	0.2659	0.31479	0.370234	0.402803
North America	Canada	Blueberries	Fruits & Berries	164205	1.5	0.246308	0.2078	0.2444	0.2659	0.0511827	0.0601976	0.0654932
East Asia	China	Blueberries	Fruits & Berries		1.5	0	0.2078	0.2444	0.2659	0	0	0
East Asia	Taiwan	Blueberries	Fruits & Berries		1.5	0	0.2078	0.2444	0.2659	0	0	0
East Asia	Japan	Blueberries	Fruits & Berries		1.5	0	0.2078	0.2444	0.2659	0	0	0
Central & West Asia	Kyrgyzstan	Blueberries	Fruits & Berries		1.5	0	0.2078	0.2444	0.2659	0	0	0
Latin America	Mexico	Blueberries	Fruits & Berries	40251	1.5	0.0603765	0.2078	0.2444	0.2659	0.0125462	0.014756	0.0160541
Latin America	Peru	Blueberries	Fruits & Berries	94805	1.5	0.142207	0.2078	0.2444	0.2659	0.0295507	0.0347555	0.037813
North America	United States of America	Blueberries	Fruits & Berries	255050	1.5	0.382575	0.2078	0.2444	0.2659	0.0794991	0.0935013	0.101727
Central & West Asia	Uzbekistan	Blueberries	Fruits & Berries	662	1.5	0.000993	0.2078	0.2444	0.2659	0.000206345	0.000242689	0.000264039
Pacific		Blueberries	Fruits & Berries	8168	1.5	0.012252	0.2078	0.2444	0.2659	0.00254597	0.00299439	0.00325781
Europe		Blueberries	Fruits & Berries	119570	1.5	0.179355	0.2078	0.2444	0.2659	0.03727	0.0438344	0.0476905
Africa		Blueberries	Fruits & Berries	78	1.5	0.000117	0.2078	0.2444	0.2659	2.43126e-05	2.85948e-05	3.11103e-05
World		Blueberries	Fruits & Berries	682790	1.5	1.02418	0.2078	0.2444	0.2659	0.212826	0.250311	0.272331
Latin America	Brazil	Cashewapple	Fruits & Berries	1541010	1.5	2.31151	0.2078	0.2444	0.2659	0.480333	0.564934	0.614632
Latin America	Guyana	Cashewapple	Fruits & Berries	5	1.5	7.5e-06	0.2078	0.2444	0.2659	1.5585e-06	1.833e-06	1.99425e-06
Africa		Cashewapple	Fruits & Berries	169993	1.5	0.254989	0.2078	0.2444	0.2659	0.0529868	0.0623194	0.0678017
World		Cashewapple	Fruits & Berries	1711009	1.5	2.56651	0.2078	0.2444	0.2659	0.533322	0.627256	0.682436
Latin America	Argentina	Quinces	Fruits & Berries	28482	1.5	0.042723	0.2078	0.2444	0.2659	0.00887784	0.0104415	0.01136
Central & West Asia	Armenia	Quinces	Fruits & Berries	2269	1.5	0.0034035	0.2078	0.2444	0.2659	0.000707247	0.000831815	0.000904991
Central & West Asia	Azerbaijan	Quinces	Fruits & Berries	32290	1.5	0.048435	0.2078	0.2444	0.2659	0.0100648	0.0118375	0.0128789
Latin America	Bolivia (Plurinational State of)	Quinces	Fruits & Berries	128	1.5	0.000192	0.2078	0.2444	0.2659	3.98976e-05	4.69248e-05	5.10528e-05
Latin America	Brazil	Quinces	Fruits & Berries	521	1.5	0.0007815	0.2078	0.2444	0.2659	0.000162396	0.000190999	0.000207801
Latin America	Chile	Quinces	Fruits & Berries	532	1.5	0.000798	0.2078	0.2444	0.2659	0.000165824	0.000195031	0.000212188
East Asia	China	Quinces	Fruits & Berries	118593	1.5	0.17789	0.2078	0.2444	0.2659	0.0369654	0.0434762	0.0473008
Central & West Asia	Georgia	Quinces	Fruits & Berries	1000	1.5	0.0015	0.2078	0.2444	0.2659	0.0003117	0.0003666	0.00039885
Central & West Asia	Iran	Quinces	Fruits & Berries	76508	1.5	0.114762	0.2078	0.2444	0.2659	0.0238475	0.0280478	0.0305152
Central & West Asia	Iraq	Quinces	Fruits & Berries	1866	1.5	0.002799	0.2078	0.2444	0.2659	0.000581632	0.000684076	0.000744254
Central & West Asia	Israel	Quinces	Fruits & Berries	2300	1.5	0.00345	0.2078	0.2444	0.2659	0.00071691	0.00084318	0.000917355
East Asia	Japan	Quinces	Fruits & Berries	169	1.5	0.0002535	0.2078	0.2444	0.2659	5.26773e-05	6.19554e-05	6.74057e-05
Central & West Asia	Jordan	Quinces	Fruits & Berries		1.5	0	0.2078	0.2444	0.2659	0	0	0
Central & West Asia	Kazakhstan	Quinces	Fruits & Berries	904	1.5	0.001356	0.2078	0.2444	0.2659	0.000281777	0.000331406	0.00036056
Central & West Asia	Kyrgyzstan	Quinces	Fruits & Berries	2313	1.5	0.0034695	0.2078	0.2444	0.2659	0.000720962	0.000847946	0.00092254
Central & West Asia	Lebanon	Quinces	Fruits & Berries		1.5	0	0.2078	0.2444	0.2659	0	0	0
Latin America	Mexico	Quinces	Fruits & Berries	5217	1.5	0.0078255	0.2078	0.2444	0.2659	0.00162614	0.00191255	0.0020808
Central & West Asia	Palestine	Quinces	Fruits & Berries	65	1.5	9.75e-05	0.2078	0.2444	0.2659	2.02605e-05	2.3829e-05	2.59253e-05
Latin America	Peru	Quinces	Fruits & Berries	4848	1.5	0.007272	0.2078	0.2444	0.2659	0.00151112	0.00177728	0.00193362
Central & West Asia	Syria	Quinces	Fruits & Berries	2959	1.5	0.0044385	0.2078	0.2444	0.2659	0.00092232	0.00108477	0.0011802
Central & West Asia	Turkey	Quinces	Fruits & Berries	176479	1.5	0.264719	0.2078	0.2444	0.2659	0.0550085	0.0646972	0.0703886
Latin America	Uruguay	Quinces	Fruits & Berries	4427	1.5	0.0066405	0.2078	0.2444	0.2659	0.0013799	0.00162294	0.00176571
Central & West Asia	Uzbekistan	Quinces	Fruits & Berries	76865	1.5	0.115297	0.2078	0.2444	0.2659	0.0239588	0.0281787	0.0306576
Central & West Asia	Yemen	Quinces	Fruits & Berries	1423	1.5	0.0021345	0.2078	0.2444	0.2659	0.000443549	0.000521672	0.000567564
Pacific		Quinces	Fruits & Berries	#VALUE!	1.5	#VALUE!	0.2078	0.2444	0.2659	#VALUE!	#VALUE!	#VALUE!
Europe		Quinces	Fruits & Berries	72535	1.5	0.108802	0.2078	0.2444	0.2659	0.0226092	0.0265913	0.0289306
Africa		Quinces	Fruits & Berries	74551	1.5	0.111826	0.2078	0.2444	0.2659	0.0232375	0.0273304	0.0297347
World		Quinces	Fruits & Berries	688660	1.5	1.03299	0.2078	0.2444	0.2659	0.214655	0.252463	0.274672
Central & West Asia	Azerbaijan	Raspberries	Fruits & Berries	11960	1.5	0.01794	0.2078	0.2444	0.2659	0.00372793	0.00438454	0.00477025
North America	Canada	Raspberries	Fruits & Berries	11235	1.5	0.0168525	0.2078	0.2444	0.2659	0.00350195	0.00411875	0.00448108
Latin America	Chile	Raspberries	Fruits & Berries	19681	1.5	0.0295215	0.2078	0.2444	0.2659	0.00613457	0.00721505	0.00784977
Central & West Asia	Kyrgyzstan	Raspberries	Fruits & Berries	2864	1.5	0.004296	0.2078	0.2444	0.2659	0.000892709	0.00104994	0.00114231
Latin America	Mexico	Raspberries	Fruits & Berries	130187	1.5	0.19528	0.2078	0.2444	0.2659	0.0405793	0.0477266	0.0519251
North America	United States of America	Raspberries	Fruits & Berries	99250	1.5	0.148875	0.2078	0.2444	0.2659	0.0309362	0.0363851	0.0395859
Pacific		Raspberries	Fruits & Berries	#VALUE!	1.5	#VALUE!	0.2078	0.2444	0.2659	#VALUE!	#VALUE!	#VALUE!
Europe		Raspberries	Fruits & Berries	593746	1.5	0.890619	0.2078	0.2444	0.2659	0.185071	0.217667	0.236816
Africa		Raspberries	Fruits & Berries	437	1.5	0.0006555	0.2078	0.2444	0.2659	0.000136213	0.000160204	0.000174297
World		Raspberries	Fruits & Berries	870209	1.5	1.30531	0.2078	0.2444	0.2659	0.271244	0.319019	0.347083
Latin America	Argentina	Cherries	Fruits & Berries	7285	1.5	0.0109275	0.2078	0.2444	0.2659	0.00227073	0.00267068	0.00290562
Central & West Asia	Armenia	Cherries	Fruits & Berries	12517	1.5	0.0187755	0.2078	0.2444	0.2659	0.00390155	0.00458873	0.00499241
Central & West Asia	Azerbaijan	Cherries	Fruits & Berries	11062	1.5	0.016593	0.2078	0.2444	0.2659	0.00344803	0.00405533	0.00441208
Latin America	Bolivia (Plurinational State of)	Cherries	Fruits & Berries	879	1.5	0.0013185	0.2078	0.2444	0.2659	0.000273984	0.000322241	0.000350589
North America	Canada	Cherries	Fruits & Berries	27871	1.5	0.0418065	0.2078	0.2444	0.2659	0.00868739	0.0102175	0.0111163
Latin America	Chile	Cherries	Fruits & Berries	155935	1.5	0.233903	0.2078	0.2444	0.2659	0.0486049	0.0571658	0.0621947
East Asia	China	Cherries	Fruits & Berries	37577	1.5	0.0563655	0.2078	0.2444	0.2659	0.0117128	0.0137757	0.0149876
Central & West Asia	Georgia	Cherries	Fruits & Berries	4400	1.5	0.0066	0.2078	0.2444	0.2659	0.00137148	0.00161304	0.00175494
Latin America	Guyana	Cherries	Fruits & Berries	2359	1.5	0.0035385	0.2078	0.2444	0.2659	0.0007353	0.000864809	0.000940887
South Asia	India	Cherries	Fruits & Berries	10950	1.5	0.016425	0.2078	0.2444	0.2659	0.00341311	0.00401427	0.00436741
Central & West Asia	Iran	Cherries	Fruits & Berries	137268	1.5	0.205902	0.2078	0.2444	0.2659	0.0427864	0.0503224	0.0547493
Central & West Asia	Israel	Cherries	Fruits & Berries	3000	1.5	0.0045	0.2078	0.2444	0.2659	0.0009351	0.0010998	0.00119655
East Asia	Japan	Cherries	Fruits & Berries	18100	1.5	0.02715	0.2078	0.2444	0.2659	0.00564177	0.00663546	0.00721919
Central & West Asia	Jordan	Cherries	Fruits & Berries	671	1.5	0.0010065	0.2078	0.2444	0.2659	0.000209151	0.000245989	0.000267628
Central & West Asia	Kazakhstan	Cherries	Fruits & Berries	513	1.5	0.0007695	0.2078	0.2444	0.2659	0.000159902	0.000188066	0.00020461
Central & West Asia	Kyrgyzstan	Cherries	Fruits & Berries	5043	1.5	0.0075645	0.2078	0.2444	0.2659	0.0015719	0.00184876	0.0020114
Central & West Asia	Lebanon	Cherries	Fruits & Berries	18777	1.5	0.0281655	0.2078	0.2444	0.2659	0.00585279	0.00688365	0.00748921
Latin America	Mexico	Cherries	Fruits & Berries	178	1.5	0.000267	0.2078	0.2444	0.2659	5.54826e-05	6.52548e-05	7.09953e-05
South Asia	Pakistan	Cherries	Fruits & Berries	1964	1.5	0.002946	0.2078	0.2444	0.2659	0.000612179	0.000720002	0.000783341
Central & West Asia	Palestine	Cherries	Fruits & Berries	1212	1.5	0.001818	0.2078	0.2444	0.2659	0.00037778	0.000444319	0.000483406
Latin America	Peru	Cherries	Fruits & Berries	4	1.5	6e-06	0.2078	0.2444	0.2659	1.2468e-06	1.4664e-06	1.5954e-06
Latin America	Suriname	Cherries	Fruits & Berries	1256	1.5	0.001884	0.2078	0.2444	0.2659	0.000391495	0.00046045	0.000500956
Central & West Asia	Syria	Cherries	Fruits & Berries	54200	1.5	0.0813	0.2078	0.2444	0.2659	0.0168941	0.0198697	0.0216177
Central & West Asia	Turkey	Cherries	Fruits & Berries	639564	1.5	0.959346	0.2078	0.2444	0.2659	0.199352	0.234464	0.25509
North America	United States of America	Cherries	Fruits & Berries	312430	1.5	0.468645	0.2078	0.2444	0.2659	0.0973844	0.114537	0.124613
Central & West Asia	Uzbekistan	Cherries	Fruits & Berries	172035	1.5	0.258053	0.2078	0.2444	0.2659	0.0536233	0.063068	0.0686162
Pacific		Cherries	Fruits & Berries	18266	1.5	0.027399	0.2078	0.2444	0.2659	0.00569351	0.00669632	0.00728539
Europe		Cherries	Fruits & Berries	863645	1.5	1.29547	0.2078	0.2444	0.2659	0.269198	0.316612	0.344465
Africa		Cherries	Fruits & Berries	28605	1.5	0.0429075	0.2078	0.2444	0.2659	0.00891618	0.0104866	0.0114091
World		Cherries	Fruits & Berries	2547944	1.5	3.82192	0.2078	0.2444	0.2659	0.794194	0.934076	1.01625
Central & West Asia	Armenia	Cherries, sour	Fruits & Berries	4737	1.5	0.0071055	0.2078	0.2444	0.2659	0.00147652	0.00173658	0.00188935
Central & West Asia	Azerbaijan	Cherries, sour	Fruits & Berries	38853	1.5	0.0582795	0.2078	0.2444	0.2659	0.0121105	0.0142435	0.0154965
Latin America	Bolivia (Plurinational State of)	Cherries, sour	Fruits & Berries	71	1.5	0.0001065	0.2078	0.2444	0.2659	2.21307e-05	2.60286e-05	2.83184e-05
North America	Canada	Cherries, sour	Fruits & Berries	6033	1.5	0.0090495	0.2078	0.2444	0.2659	0.00188049	0.0022117	0.00240626
Latin America	Chile	Cherries, sour	Fruits & Berries	135	1.5	0.0002025	0.2078	0.2444	0.2659	4.20795e-05	4.9491e-05	5.38447e-05
Central & West Asia	Georgia	Cherries, sour	Fruits & Berries		1.5	0	0.2078	0.2444	0.2659	0	0	0
Central & West Asia	Iran	Cherries, sour	Fruits & Berries	109707	1.5	0.16456	0.2078	0.2444	0.2659	0.0341957	0.0402186	0.0437566
Central & West Asia	Kazakhstan	Cherries, sour	Fruits & Berries	240	1.5	0.00036	0.2078	0.2444	0.2659	7.4808e-05	8.7984e-05	9.5724e-05
Latin America	Peru	Cherries, sour	Fruits & Berries	1360	1.5	0.00204	0.2078	0.2444	0.2659	0.000423912	0.000498576	0.000542436
Central & West Asia	Turkey	Cherries, sour	Fruits & Berries	184167	1.5	0.276251	0.2078	0.2444	0.2659	0.0574049	0.0675156	0.073455
North America	United States of America	Cherries, sour	Fruits & Berries	135310	1.5	0.202965	0.2078	0.2444	0.2659	0.0421761	0.0496046	0.0539684
Central & West Asia	Uzbekistan	Cherries, sour	Fruits & Berries	56665	1.5	0.0849975	0.2078	0.2444	0.2659	0.0176625	0.0207734	0.0226008
Europe		Cherries, sour	Fruits & Berries	991723	1.5	1.48758	0.2078	0.2444	0.2659	0.30912	0.363566	0.395549
World		Cherries, sour	Fruits & Berries	1529000	1.5	2.2935	0.2078	0.2444	0.2659	0.476589	0.560531	0.609842
South Asia	Afghanistan	Citrus Fruit, Total	Fruits & Berries	7510	1.5	0.011265	0.2078	0.2444	0.2659	0.00234087	0.00275317	0.00299536
Latin America	Argentina	Citrus Fruit, Total	Fruits & Berries	3541671	1.5	5.31251	0.2078	0.2444	0.2659	1.10394	1.29838	1.4126
Central & West Asia	Azerbaijan	Citrus Fruit, Total	Fruits & Berries	49139	1.5	0.0737085	0.2078	0.2444	0.2659	0.0153166	0.0180144	0.0195991
Central & West Asia	Bahrain	Citrus Fruit, Total	Fruits & Berries	1088	1.5	0.001632	0.2078	0.2444	0.2659	0.00033913	0.000398861	0.000433949
South Asia	Bangladesh	Citrus Fruit, Total	Fruits & Berries	160615	1.5	0.240923	0.2078	0.2444	0.2659	0.0500637	0.0588815	0.0640613
Latin America	Belize	Citrus Fruit, Total	Fruits & Berries	106797	1.5	0.160195	0.2078	0.2444	0.2659	0.0332886	0.0391518	0.042596
South Asia	Bhutan	Citrus Fruit, Total	Fruits & Berries	46647	1.5	0.0699705	0.2078	0.2444	0.2659	0.0145399	0.0171008	0.0186052
Latin America	Bolivia (Plurinational State of)	Citrus Fruit, Total	Fruits & Berries	460663	1.5	0.690994	0.2078	0.2444	0.2659	0.143589	0.168879	0.183735
Latin America	Brazil	Citrus Fruit, Total	Fruits & Berries	19273659	1.5	28.9105	0.2078	0.2444	0.2659	6.0076	7.06572	7.6873
South East Asia	Brunei	Citrus Fruit, Total	Fruits & Berries	528	1.5	0.000792	0.2078	0.2444	0.2659	0.000164578	0.000193565	0.000210593
South East Asia	Cambodia	Citrus Fruit, Total	Fruits & Berries	72649	1.5	0.108974	0.2078	0.2444	0.2659	0.0226447	0.0266331	0.0289761
Latin America	Chile	Citrus Fruit, Total	Fruits & Berries	384484	1.5	0.576726	0.2078	0.2444	0.2659	0.119844	0.140952	0.153351
East Asia	China	Citrus Fruit, Total	Fruits & Berries	41905490	1.5	62.8582	0.2078	0.2444	0.2659	13.0619	15.3626	16.714
East Asia	Taiwan	Citrus Fruit, Total	Fruits & Berries	524090	1.5	0.786135	0.2078	0.2444	0.2659	0.163359	0.192131	0.209033
Latin America	Colombia	Citrus Fruit, Total	Fruits & Berries	1160762	1.5	1.74114	0.2078	0.2444	0.2659	0.36181	0.425535	0.46297
Latin America	Costa Rica	Citrus Fruit, Total	Fruits & Berries	294846	1.5	0.442269	0.2078	0.2444	0.2659	0.0919035	0.108091	0.117599
Latin America	Ecuador	Citrus Fruit, Total	Fruits & Berries	175474	1.5	0.263211	0.2078	0.2444	0.2659	0.0546952	0.0643288	0.0699878
Latin America	El Salvador	Citrus Fruit, Total	Fruits & Berries	89278	1.5	0.133917	0.2078	0.2444	0.2659	0.027828	0.0327293	0.0356085
Latin America	French Guyana	Citrus Fruit, Total	Fruits & Berries	16640	1.5	0.02496	0.2078	0.2444	0.2659	0.00518669	0.00610022	0.00663686
Central & West Asia	Georgia	Citrus Fruit, Total	Fruits & Berries	66300	1.5	0.09945	0.2078	0.2444	0.2659	0.0206657	0.0243056	0.0264438
Latin America	Guatemala	Citrus Fruit, Total	Fruits & Berries	377027	1.5	0.565541	0.2078	0.2444	0.2659	0.117519	0.138218	0.150377
Latin America	Guyana	Citrus Fruit, Total	Fruits & Berries	30299	1.5	0.0454485	0.2078	0.2444	0.2659	0.0094442	0.0111076	0.0120848
Latin America	Honduras	Citrus Fruit, Total	Fruits & Berries	294353	1.5	0.44153	0.2078	0.2444	0.2659	0.0917498	0.10791	0.117403
South Asia	India	Citrus Fruit, Total	Fruits & Berries	12546000	1.5	18.819	0.2078	0.2444	0.2659	3.91059	4.59936	5.00397
South East Asia	Indonesia	Citrus Fruit, Total	Fruits & Berries	2510442	1.5	3.76566	0.2078	0.2444	0.2659	0.782505	0.920328	1.00129
Central & West Asia	Iran	Citrus Fruit, Total	Fruits & Berries	3486836	1.5	5.23025	0.2078	0.2444	0.2659	1.08685	1.27827	1.39072
Central & West Asia	Iraq	Citrus Fruit, Total	Fruits & Berries	78144	1.5	0.117216	0.2078	0.2444	0.2659	0.0243575	0.0286476	0.0311677
Central & West Asia	Israel	Citrus Fruit, Total	Fruits & Berries	497204	1.5	0.745806	0.2078	0.2444	0.2659	0.154978	0.182275	0.19831
East Asia	Japan	Citrus Fruit, Total	Fruits & Berries	886864	1.5	1.3303	0.2078	0.2444	0.2659	0.276436	0.325124	0.353726
Central & West Asia	Jordan	Citrus Fruit, Total	Fruits & Berries	104316	1.5	0.156474	0.2078	0.2444	0.2659	0.0325153	0.0382422	0.0416064
Central & West Asia	Kazakhstan	Citrus Fruit, Total	Fruits & Berries	806	1.5	0.001209	0.2078	0.2444	0.2659	0.00025123	0.00029548	0.000321473
Central & West Asia	Kuwait	Citrus Fruit, Total	Fruits & Berries	536	1.5	0.000804	0.2078	0.2444	0.2659	0.000167071	0.000196498	0.000213784
Central & West Asia	Kyrgyzstan	Citrus Fruit, Total	Fruits & Berries	90	1.5	0.000135	0.2078	0.2444	0.2659	2.8053e-05	3.2994e-05	3.58965e-05
South East Asia	Laos	Citrus Fruit, Total	Fruits & Berries	100280	1.5	0.15042	0.2078	0.2444	0.2659	0.0312573	0.0367626	0.0399967
Central & West Asia	Lebanon	Citrus Fruit, Total	Fruits & Berries	265348	1.5	0.398022	0.2078	0.2444	0.2659	0.082709	0.0972766	0.105834
South East Asia	Malaysia	Citrus Fruit, Total	Fruits & Berries	36661	1.5	0.0549915	0.2078	0.2444	0.2659	0.0114272	0.0134399	0.0146222
South Asia	Maldives	Citrus Fruit, Total	Fruits & Berries	40	1.5	6e-05	0.2078	0.2444	0.2659	1.2468e-05	1.4664e-05	1.5954e-05
Latin America	Mexico	Citrus Fruit, Total	Fruits & Berries	8437589	1.5	12.6564	0.2078	0.2444	0.2659	2.63	3.09322	3.36533
South Asia	Nepal	Citrus Fruit, Total	Fruits & Berries	245175	1.5	0.367762	0.2078	0.2444	0.2659	0.076421	0.0898812	0.097788
Latin America	Nicaragua	Citrus Fruit, Total	Fruits & Berries	119272	1.5	0.178908	0.2078	0.2444	0.2659	0.0371771	0.0437251	0.0475716
Central & West Asia	Oman	Citrus Fruit, Total	Fruits & Berries	7112	1.5	0.010668	0.2078	0.2444	0.2659	0.00221681	0.00260726	0.00283662
South Asia	Pakistan	Citrus Fruit, Total	Fruits & Berries	2247956	1.5	3.37193	0.2078	0.2444	0.2659	0.700688	0.824101	0.896597
Central & West Asia	Palestine	Citrus Fruit, Total	Fruits & Berries	34304	1.5	0.051456	0.2078	0.2444	0.2659	0.0106926	0.0125758	0.0136822
Latin America	Panama	Citrus Fruit, Total	Fruits & Berries	40967	1.5	0.0614505	0.2078	0.2444	0.2659	0.0127694	0.0150185	0.0163397
Latin America	Paraguay	Citrus Fruit, Total	Fruits & Berries	331574	1.5	0.497361	0.2078	0.2444	0.2659	0.103352	0.121555	0.132248
Latin America	Peru	Citrus Fruit, Total	Fruits & Berries	1330789	1.5	1.99618	0.2078	0.2444	0.2659	0.414807	0.487867	0.530785
South East Asia	Philippines	Citrus Fruit, Total	Fruits & Berries	155737	1.5	0.233605	0.2078	0.2444	0.2659	0.0485432	0.0570932	0.0621157
Central & West Asia	Qatar	Citrus Fruit, Total	Fruits & Berries	166	1.5	0.000249	0.2078	0.2444	0.2659	5.17422e-05	6.08556e-05	6.62091e-05
East Asia	Republic of Korea	Citrus Fruit, Total	Fruits & Berries	647318	1.5	0.970977	0.2078	0.2444	0.2659	0.201769	0.237307	0.258183
Central & West Asia	Saudi Arabia	Citrus Fruit, Total	Fruits & Berries	40428	1.5	0.060642	0.2078	0.2444	0.2659	0.0126014	0.0148209	0.0161247
South Asia	Sri Lanka	Citrus Fruit, Total	Fruits & Berries	373048	1.5	0.559572	0.2078	0.2444	0.2659	0.116279	0.136759	0.14879
Latin America	Suriname	Citrus Fruit, Total	Fruits & Berries	24872	1.5	0.037308	0.2078	0.2444	0.2659	0.0077526	0.00911808	0.0099202
Central & West Asia	Syria	Citrus Fruit, Total	Fruits & Berries	1125057	1.5	1.68759	0.2078	0.2444	0.2659	0.35068	0.412446	0.448729
Central & West Asia	Tajikistan	Citrus Fruit, Total	Fruits & Berries	5934	1.5	0.008901	0.2078	0.2444	0.2659	0.00184963	0.0021754	0.00236678
South East Asia	Thailand	Citrus Fruit, Total	Fruits & Berries	1009675	1.5	1.51451	0.2078	0.2444	0.2659	0.314716	0.370147	0.402709
South East Asia	Timor-Leste	Citrus Fruit, Total	Fruits & Berries	1981	1.5	0.0029715	0.2078	0.2444	0.2659	0.000617478	0.000726235	0.000790122
Central & West Asia	Turkey	Citrus Fruit, Total	Fruits & Berries	4902052	1.5	7.35308	0.2078	0.2444	0.2659	1.52797	1.79709	1.95518
Central & West Asia	United Arab Emirates	Citrus Fruit, Total	Fruits & Berries	7653	1.5	0.0114795	0.2078	0.2444	0.2659	0.00238544	0.00280559	0.0030524
North America	United States of America	Citrus Fruit, Total	Fruits & Berries	7038334	1.5	10.5575	0.2078	0.2444	0.2659	2.19385	2.58025	2.80724
Latin America	Uruguay	Citrus Fruit, Total	Fruits & Berries	216861	1.5	0.325292	0.2078	0.2444	0.2659	0.0675956	0.0795012	0.086495
Central & West Asia	Uzbekistan	Citrus Fruit, Total	Fruits & Berries	16771	1.5	0.0251565	0.2078	0.2444	0.2659	0.00522752	0.00614825	0.00668911
Latin America	Venezuela (Bolivarian Republic of)	Citrus Fruit, Total	Fruits & Berries	572184	1.5	0.858276	0.2078	0.2444	0.2659	0.17835	0.209763	0.228216
South East Asia	Viet Nam	Citrus Fruit, Total	Fruits & Berries	1510345	1.5	2.26552	0.2078	0.2444	0.2659	0.470775	0.553692	0.602401
Central & West Asia	Yemen	Citrus Fruit, Total	Fruits & Berries	153916	1.5	0.230874	0.2078	0.2444	0.2659	0.0479756	0.0564256	0.0613894
Pacific		Citrus Fruit, Total	Fruits & Berries	599036	1.5	0.898554	0.2078	0.2444	0.2659	0.18672	0.219607	0.238926
Europe		Citrus Fruit, Total	Fruits & Berries	11187221	1.5	16.7808	0.2078	0.2444	0.2659	3.48706	4.10124	4.46202
Africa		Citrus Fruit, Total	Fruits & Berries	20311124	1.5	30.4667	0.2078	0.2444	0.2659	6.33098	7.44606	8.10109
Caribbean		Citrus Fruit, Total	Fruits & Berries	641500	1.5	0.96225	0.2078	0.2444	0.2659	0.199956	0.235174	0.255862
World		Citrus Fruit, Total	Fruits & Berries	152448800	1.5	228.673	0.2078	0.2444	0.2659	47.5183	55.8877	60.8042
Central & West Asia	Azerbaijan	Cranberries	Fruits & Berries	2874	1.5	0.004311	0.2078	0.2444	0.2659	0.000895826	0.00105361	0.00114629
North America	Canada	Cranberries	Fruits & Berries	195196	1.5	0.292794	0.2078	0.2444	0.2659	0.0608426	0.0715589	0.0778539
Latin America	Chile	Cranberries	Fruits & Berries	106180	1.5	0.15927	0.2078	0.2444	0.2659	0.0330963	0.0389256	0.0423499
Central & West Asia	Turkey	Cranberries	Fruits & Berries	11481	1.5	0.0172215	0.2078	0.2444	0.2659	0.00357863	0.00420893	0.0045792
North America	United States of America	Cranberries	Fruits & Berries	404880	1.5	0.60732	0.2078	0.2444	0.2659	0.126201	0.148429	0.161486
Europe		Cranberries	Fruits & Berries	1863	1.5	0.0027945	0.2078	0.2444	0.2659	0.000580697	0.000682976	0.000743058
Africa		Cranberries	Fruits & Berries	209	1.5	0.0003135	0.2078	0.2444	0.2659	6.51453e-05	7.66194e-05	8.33597e-05
World		Cranberries	Fruits & Berries	722684	1.5	1.08403	0.2078	0.2444	0.2659	0.225261	0.264936	0.288243
Central & West Asia	Azerbaijan	Currants	Fruits & Berries	2296	1.5	0.003444	0.2078	0.2444	0.2659	0.000715663	0.000841714	0.00091576
Latin America	Chile	Currants	Fruits & Berries	86	1.5	0.000129	0.2078	0.2444	0.2659	2.68062e-05	3.15276e-05	3.43011e-05
East Asia	Japan	Currants	Fruits & Berries	9	1.5	1.35e-05	0.2078	0.2444	0.2659	2.8053e-06	3.2994e-06	3.58965e-06
Central & West Asia	Kyrgyzstan	Currants	Fruits & Berries	118	1.5	0.000177	0.2078	0.2444	0.2659	3.67806e-05	4.32588e-05	4.70643e-05
North America	United States of America	Currants	Fruits & Berries	0	1.5	0	0.2078	0.2444	0.2659	0	0	0
Central & West Asia	Uzbekistan	Currants	Fruits & Berries	1750	1.5	0.002625	0.2078	0.2444	0.2659	0.000545475	0.00064155	0.000697988
Pacific		Currants	Fruits & Berries	9780	1.5	0.01467	0.2078	0.2444	0.2659	0.00304843	0.00358535	0.00390075
Europe		Currants	Fruits & Berries	648114	1.5	0.972171	0.2078	0.2444	0.2659	0.202017	0.237599	0.2585
Africa		Currants	Fruits & Berries	431	1.5	0.0006465	0.2078	0.2444	0.2659	0.000134343	0.000158005	0.000171904
World		Currants	Fruits & Berries	662586	1.5	0.993879	0.2078	0.2444	0.2659	0.206528	0.242904	0.264272
Central & West Asia	Bahrain	Dates	Fruits & Berries	10682	1.5	0.016023	0.2078	0.2444	0.2659	0.00332958	0.00391602	0.00426052
East Asia	China	Dates	Fruits & Berries	158294	1.5	0.237441	0.2078	0.2444	0.2659	0.0493402	0.0580306	0.0631356
Latin America	Colombia	Dates	Fruits & Berries	33	1.5	4.95e-05	0.2078	0.2444	0.2659	1.02861e-05	1.20978e-05	1.31621e-05
Central & West Asia	Iran	Dates	Fruits & Berries	1204158	1.5	1.80624	0.2078	0.2444	0.2659	0.375336	0.441444	0.480278
Central & West Asia	Iraq	Dates	Fruits & Berries	614584	1.5	0.921876	0.2078	0.2444	0.2659	0.191566	0.225306	0.245127
Central & West Asia	Israel	Dates	Fruits & Berries	44580	1.5	0.06687	0.2078	0.2444	0.2659	0.0138956	0.016343	0.0177807
Central & West Asia	Jordan	Dates	Fruits & Berries	19588	1.5	0.029382	0.2078	0.2444	0.2659	0.00610558	0.00718096	0.00781267
Central & West Asia	Kuwait	Dates	Fruits & Berries	96656	1.5	0.144984	0.2078	0.2444	0.2659	0.0301277	0.0354341	0.0385512
Latin America	Mexico	Dates	Fruits & Berries	8946	1.5	0.013419	0.2078	0.2444	0.2659	0.00278847	0.0032796	0.00356811
Central & West Asia	Oman	Dates	Fruits & Berries	368808	1.5	0.553212	0.2078	0.2444	0.2659	0.114957	0.135205	0.147099
South Asia	Pakistan	Dates	Fruits & Berries	471670	1.5	0.707505	0.2078	0.2444	0.2659	0.14702	0.172914	0.188126
Central & West Asia	Palestine	Dates	Fruits & Berries	3508	1.5	0.005262	0.2078	0.2444	0.2659	0.00109344	0.00128603	0.00139917
Latin America	Peru	Dates	Fruits & Berries	274	1.5	0.000411	0.2078	0.2444	0.2659	8.54058e-05	0.000100448	0.000109285
Central & West Asia	Qatar	Dates	Fruits & Berries	29012	1.5	0.043518	0.2078	0.2444	0.2659	0.00904304	0.0106358	0.0115714
Central & West Asia	Saudi Arabia	Dates	Fruits & Berries	1302859	1.5	1.95429	0.2078	0.2444	0.2659	0.406101	0.477628	0.519645
Central & West Asia	Syria	Dates	Fruits & Berries	3000	1.5	0.0045	0.2078	0.2444	0.2659	0.0009351	0.0010998	0.00119655
Central & West Asia	Turkey	Dates	Fruits & Berries	35577	1.5	0.0533655	0.2078	0.2444	0.2659	0.0110894	0.0130425	0.0141899
Central & West Asia	United Arab Emirates	Dates	Fruits & Berries	345119	1.5	0.517679	0.2078	0.2444	0.2659	0.107574	0.126521	0.137651
North America	United States of America	Dates	Fruits & Berries	37240	1.5	0.05586	0.2078	0.2444	0.2659	0.0116077	0.0136522	0.0148532
Central & West Asia	Yemen	Dates	Fruits & Berries	48108	1.5	0.072162	0.2078	0.2444	0.2659	0.0149953	0.0176364	0.0191879
Europe		Dates	Fruits & Berries	15061	1.5	0.0225915	0.2078	0.2444	0.2659	0.00469451	0.00552136	0.00600708
Africa		Dates	Fruits & Berries	3708461	1.5	5.56269	0.2078	0.2444	0.2659	1.15593	1.35952	1.47912
World		Dates	Fruits & Berries	8526218	1.5	12.7893	0.2078	0.2444	0.2659	2.65762	3.12571	3.40068
South Asia	Afghanistan	Figs	Fruits & Berries	6073	1.5	0.0091095	0.2078	0.2444	0.2659	0.00189295	0.00222636	0.00242222
Latin America	Argentina	Figs	Fruits & Berries	865	1.5	0.0012975	0.2078	0.2444	0.2659	0.000269621	0.000317109	0.000345005
Central & West Asia	Armenia	Figs	Fruits & Berries	1227	1.5	0.0018405	0.2078	0.2444	0.2659	0.000382456	0.000449818	0.000489389
Central & West Asia	Azerbaijan	Figs	Fruits & Berries	11215	1.5	0.0168225	0.2078	0.2444	0.2659	0.00349572	0.00411142	0.0044731
Latin America	Bolivia (Plurinational State of)	Figs	Fruits & Berries	667	1.5	0.0010005	0.2078	0.2444	0.2659	0.000207904	0.000244522	0.000266033
Latin America	Brazil	Figs	Fruits & Berries	23674	1.5	0.035511	0.2078	0.2444	0.2659	0.00737919	0.00867889	0.00944237
Latin America	Chile	Figs	Fruits & Berries	91	1.5	0.0001365	0.2078	0.2444	0.2659	2.83647e-05	3.33606e-05	3.62954e-05
East Asia	China	Figs	Fruits & Berries	13914	1.5	0.020871	0.2078	0.2444	0.2659	0.00433699	0.00510087	0.0055496
Latin America	Colombia	Figs	Fruits & Berries	2474	1.5	0.003711	0.2078	0.2444	0.2659	0.000771146	0.000906968	0.000986755
Latin America	Ecuador	Figs	Fruits & Berries	38	1.5	5.7e-05	0.2078	0.2444	0.2659	1.18446e-05	1.39308e-05	1.51563e-05
South Asia	India	Figs	Fruits & Berries	14767	1.5	0.0221505	0.2078	0.2444	0.2659	0.00460287	0.00541358	0.00588982
Central & West Asia	Iran	Figs	Fruits & Berries	59339	1.5	0.0890085	0.2078	0.2444	0.2659	0.018496	0.0217537	0.0236674
Central & West Asia	Iraq	Figs	Fruits & Berries	3213	1.5	0.0048195	0.2078	0.2444	0.2659	0.00100149	0.00117789	0.00128151
Central & West Asia	Israel	Figs	Fruits & Berries	2414	1.5	0.003621	0.2078	0.2444	0.2659	0.000752444	0.000884972	0.000962824
East Asia	Japan	Figs	Fruits & Berries	14158	1.5	0.021237	0.2078	0.2444	0.2659	0.00441305	0.00519032	0.00564692
Central & West Asia	Jordan	Figs	Fruits & Berries	785	1.5	0.0011775	0.2078	0.2444	0.2659	0.000244685	0.000287781	0.000313097
Central & West Asia	Kuwait	Figs	Fruits & Berries		1.5	0	0.2078	0.2444	0.2659	0	0	0
Central & West Asia	Lebanon	Figs	Fruits & Berries	5531	1.5	0.0082965	0.2078	0.2444	0.2659	0.00172401	0.00202766	0.00220604
Latin America	Mexico	Figs	Fruits & Berries	7705	1.5	0.0115575	0.2078	0.2444	0.2659	0.00240165	0.00282465	0.00307314
South Asia	Pakistan	Figs	Fruits & Berries	254	1.5	0.000381	0.2078	0.2444	0.2659	7.91718e-05	9.31164e-05	0.000101308
Central & West Asia	Palestine	Figs	Fruits & Berries	2757	1.5	0.0041355	0.2078	0.2444	0.2659	0.000859357	0.00101072	0.00109963
Latin America	Peru	Figs	Fruits & Berries	2947	1.5	0.0044205	0.2078	0.2444	0.2659	0.00091858	0.00108037	0.00117541
Central & West Asia	Qatar	Figs	Fruits & Berries	7	1.5	1.05e-05	0.2078	0.2444	0.2659	2.1819e-06	2.5662e-06	2.79195e-06
Central & West Asia	Syria	Figs	Fruits & Berries	35300	1.5	0.05295	0.2078	0.2444	0.2659	0.011003	0.012941	0.0140794
Central & West Asia	Tajikistan	Figs	Fruits & Berries	1225	1.5	0.0018375	0.2078	0.2444	0.2659	0.000381833	0.000449085	0.000488591
Central & West Asia	Turkey	Figs	Fruits & Berries	306499	1.5	0.459749	0.2078	0.2444	0.2659	0.0955357	0.112363	0.122247
Central & West Asia	United Arab Emirates	Figs	Fruits & Berries	497	1.5	0.0007455	0.2078	0.2444	0.2659	0.000154915	0.0001822	0.000198228
North America	United States of America	Figs	Fruits & Berries	28874	1.5	0.043311	0.2078	0.2444	0.2659	0.00900003	0.0105852	0.0115164
Central & West Asia	Uzbekistan	Figs	Fruits & Berries	3392	1.5	0.005088	0.2078	0.2444	0.2659	0.00105729	0.00124351	0.0013529
Latin America	Venezuela (Bolivarian Republic of)	Figs	Fruits & Berries		1.5	0	0.2078	0.2444	0.2659	0	0	0
Central & West Asia	Yemen	Figs	Fruits & Berries	5365	1.5	0.0080475	0.2078	0.2444	0.2659	0.00167227	0.00196681	0.00213983
Pacific		Figs	Fruits & Berries	75	1.5	0.0001125	0.2078	0.2444	0.2659	2.33775e-05	2.7495e-05	2.99138e-05
Europe		Figs	Fruits & Berries	112576	1.5	0.168864	0.2078	0.2444	0.2659	0.0350899	0.0412704	0.0449009
Africa		Figs	Fruits & Berries	464522	1.5	0.696783	0.2078	0.2444	0.2659	0.144792	0.170294	0.185275
World		Figs	Fruits & Berries	1135316	1.5	1.70297	0.2078	0.2444	0.2659	0.353878	0.416207	0.452821
South Asia	Afghanistan	Fruit Primary	Fruits & Berries	2174976	1.5	3.26246	0.2078	0.2444	0.2659	0.67794	0.797346	0.867489
Latin America	Argentina	Fruit Primary	Fruits & Berries	8066369	1.5	12.0996	0.2078	0.2444	0.2659	2.51429	2.95713	3.21727
Central & West Asia	Armenia	Fruit Primary	Fruits & Berries	646569	1.5	0.969854	0.2078	0.2444	0.2659	0.201536	0.237032	0.257884
Central & West Asia	Azerbaijan	Fruit Primary	Fruits & Berries	1519528	1.5	2.27929	0.2078	0.2444	0.2659	0.473637	0.557059	0.606064
Central & West Asia	Bahrain	Fruit Primary	Fruits & Berries	19251	1.5	0.0288765	0.2078	0.2444	0.2659	0.00600054	0.00705742	0.00767826
South Asia	Bangladesh	Fruit Primary	Fruits & Berries	4693311	1.5	7.03997	0.2078	0.2444	0.2659	1.46291	1.72057	1.87193
Latin America	Belize	Fruit Primary	Fruits & Berries	220528	1.5	0.330792	0.2078	0.2444	0.2659	0.0687386	0.0808456	0.0879576
South Asia	Bhutan	Fruit Primary	Fruits & Berries	64783	1.5	0.0971745	0.2078	0.2444	0.2659	0.0201929	0.0237494	0.0258387
Latin America	Bolivia (Plurinational State of)	Fruit Primary	Fruits & Berries	1553504	1.5	2.33026	0.2078	0.2444	0.2659	0.484227	0.569515	0.619615
Latin America	Brazil	Fruit Primary	Fruits & Berries	40047343	1.5	60.071	0.2078	0.2444	0.2659	12.4828	14.6814	15.9729
South East Asia	Brunei	Fruit Primary	Fruits & Berries	8243	1.5	0.0123645	0.2078	0.2444	0.2659	0.00256934	0.00302188	0.00328772
South East Asia	Cambodia	Fruit Primary	Fruits & Berries	386096	1.5	0.579144	0.2078	0.2444	0.2659	0.120346	0.141543	0.153994
North America	Canada	Fruit Primary	Fruits & Berries	1068128	1.5	1.60219	0.2078	0.2444	0.2659	0.332935	0.391576	0.426023
Latin America	Chile	Fruit Primary	Fruits & Berries	6222640	1.5	9.33396	0.2078	0.2444	0.2659	1.9396	2.28122	2.4819
East Asia	China	Fruit Primary	Fruits & Berries	243591639	1.5	365.387	0.2078	0.2444	0.2659	75.9275	89.3007	97.1565
East Asia	Hong Kong	Fruit Primary	Fruits & Berries	5033	1.5	0.0075495	0.2078	0.2444	0.2659	0.00156879	0.0018451	0.00200741
East Asia	Taiwan	Fruit Primary	Fruits & Berries	2836507	1.5	4.25476	0.2078	0.2444	0.2659	0.884139	1.03986	1.13134
Latin America	Colombia	Fruit Primary	Fruits & Berries	11935938	1.5	17.9039	0.2078	0.2444	0.2659	3.72043	4.37571	4.76065
Latin America	Costa Rica	Fruit Primary	Fruits & Berries	7070393	1.5	10.6056	0.2078	0.2444	0.2659	2.20384	2.59201	2.82003
East Asia	Democratic People's Republic of Korea	Fruit Primary	Fruits & Berries	1808361	1.5	2.71254	0.2078	0.2444	0.2659	0.563666	0.662945	0.721265
Latin America	Ecuador	Fruit Primary	Fruits & Berries	8067969	1.5	12.102	0.2078	0.2444	0.2659	2.51479	2.95772	3.21791
Latin America	El Salvador	Fruit Primary	Fruits & Berries	308459	1.5	0.462689	0.2078	0.2444	0.2659	0.0961467	0.113081	0.123029
Latin America	French Guyana	Fruit Primary	Fruits & Berries	51084	1.5	0.076626	0.2078	0.2444	0.2659	0.0159229	0.0187274	0.0203749
Central & West Asia	Georgia	Fruit Primary	Fruits & Berries	549000	1.5	0.8235	0.2078	0.2444	0.2659	0.171123	0.201263	0.218969
Latin America	Guatemala	Fruit Primary	Fruits & Berries	6235150	1.5	9.35272	0.2078	0.2444	0.2659	1.9435	2.28581	2.48689
Latin America	Guyana	Fruit Primary	Fruits & Berries	172889	1.5	0.259333	0.2078	0.2444	0.2659	0.0538895	0.0633811	0.0689568
Latin America	Honduras	Fruit Primary	Fruits & Berries	1598418	1.5	2.39763	0.2078	0.2444	0.2659	0.498227	0.58598	0.637529
South Asia	India	Fruit Primary	Fruits & Berries	98722276	1.5	148.083	0.2078	0.2444	0.2659	30.7717	36.1916	39.3754
South East Asia	Indonesia	Fruit Primary	Fruits & Berries	20436395	1.5	30.6546	0.2078	0.2444	0.2659	6.37002	7.49198	8.15106
Central & West Asia	Iran	Fruit Primary	Fruits & Berries	18898461	1.5	28.3477	0.2078	0.2444	0.2659	5.89065	6.92818	7.53765
Central & West Asia	Iraq	Fruit Primary	Fruits & Berries	1281893	1.5	1.92284	0.2078	0.2444	0.2659	0.399566	0.469942	0.511283
Central & West Asia	Israel	Fruit Primary	Fruits & Berries	1400356	1.5	2.10053	0.2078	0.2444	0.2659	0.436491	0.513371	0.558532
East Asia	Japan	Fruit Primary	Fruits & Berries	3229743	1.5	4.84461	0.2078	0.2444	0.2659	1.00671	1.18402	1.28818
Central & West Asia	Jordan	Fruit Primary	Fruits & Berries	506101	1.5	0.759151	0.2078	0.2444	0.2659	0.157752	0.185537	0.201858
Central & West Asia	Kazakhstan	Fruit Primary	Fruits & Berries	2533497	1.5	3.80025	0.2078	0.2444	0.2659	0.789691	0.92878	1.01049
Central & West Asia	Kuwait	Fruit Primary	Fruits & Berries	104888	1.5	0.157332	0.2078	0.2444	0.2659	0.0326936	0.0384519	0.0418346
Central & West Asia	Kyrgyzstan	Fruit Primary	Fruits & Berries	460291	1.5	0.690437	0.2078	0.2444	0.2659	0.143473	0.168743	0.183587
South East Asia	Laos	Fruit Primary	Fruits & Berries	1414629	1.5	2.12194	0.2078	0.2444	0.2659	0.44094	0.518603	0.564225
Central & West Asia	Lebanon	Fruit Primary	Fruits & Berries	781305	1.5	1.17196	0.2078	0.2444	0.2659	0.243533	0.286426	0.311623
South East Asia	Malaysia	Fruit Primary	Fruits & Berries	1229792	1.5	1.84469	0.2078	0.2444	0.2659	0.383326	0.450842	0.490503
South Asia	Maldives	Fruit Primary	Fruits & Berries	4392	1.5	0.006588	0.2078	0.2444	0.2659	0.00136899	0.00161011	0.00175175
Latin America	Mexico	Fruit Primary	Fruits & Berries	22768278	1.5	34.1524	0.2078	0.2444	0.2659	7.09687	8.34685	9.08113
East Asia	Mongolia	Fruit Primary	Fruits & Berries	1701	1.5	0.0025515	0.2078	0.2444	0.2659	0.000530202	0.000623587	0.000678444
South East Asia	Myanmar	Fruit Primary	Fruits & Berries	2664888	1.5	3.99733	0.2078	0.2444	0.2659	0.830646	0.976948	1.06289
South Asia	Nepal	Fruit Primary	Fruits & Berries	1341334	1.5	2.012	0.2078	0.2444	0.2659	0.418094	0.491733	0.534991
Latin America	Nicaragua	Fruit Primary	Fruits & Berries	568083	1.5	0.852124	0.2078	0.2444	0.2659	0.177071	0.208259	0.22658
Central & West Asia	Oman	Fruit Primary	Fruits & Berries	505114	1.5	0.757671	0.2078	0.2444	0.2659	0.157444	0.185175	0.201465
South Asia	Pakistan	Fruit Primary	Fruits & Berries	7223283	1.5	10.8349	0.2078	0.2444	0.2659	2.2515	2.64806	2.88101
Central & West Asia	Palestine	Fruit Primary	Fruits & Berries	113406	1.5	0.170109	0.2078	0.2444	0.2659	0.0353487	0.0415746	0.045232
Latin America	Panama	Fruit Primary	Fruits & Berries	630209	1.5	0.945314	0.2078	0.2444	0.2659	0.196436	0.231035	0.251359
Latin America	Paraguay	Fruit Primary	Fruits & Berries	737758	1.5	1.10664	0.2078	0.2444	0.2659	0.229959	0.270462	0.294255
Latin America	Peru	Fruit Primary	Fruits & Berries	6657325	1.5	9.98599	0.2078	0.2444	0.2659	2.07509	2.44058	2.65527
South East Asia	Philippines	Fruit Primary	Fruits & Berries	16766576	1.5	25.1499	0.2078	0.2444	0.2659	5.22614	6.14663	6.68735
Central & West Asia	Qatar	Fruit Primary	Fruits & Berries	32170	1.5	0.048255	0.2078	0.2444	0.2659	0.0100274	0.0117935	0.012831
East Asia	Republic of Korea	Fruit Primary	Fruits & Berries	3214816	1.5	4.82222	0.2078	0.2444	0.2659	1.00206	1.17855	1.28223
North America	Saint Pierre and Miquelon	Fruit Primary	Fruits & Berries		1.5	0	0.2078	0.2444	0.2659	0	0	0
Central & West Asia	Saudi Arabia	Fruit Primary	Fruits & Berries	2276389	1.5	3.41458	0.2078	0.2444	0.2659	0.70955	0.834524	0.907938
South East Asia	Singapore	Fruit Primary	Fruits & Berries	10	1.5	1.5e-05	0.2078	0.2444	0.2659	3.117e-06	3.666e-06	3.9885e-06
South Asia	Sri Lanka	Fruit Primary	Fruits & Berries	1712559	1.5	2.56884	0.2078	0.2444	0.2659	0.533805	0.627824	0.683054
Latin America	Suriname	Fruit Primary	Fruits & Berries	100055	1.5	0.150083	0.2078	0.2444	0.2659	0.0311871	0.0366802	0.0399069
Central & West Asia	Syria	Fruit Primary	Fruits & Berries	2273310	1.5	3.40997	0.2078	0.2444	0.2659	0.708591	0.833395	0.90671
Central & West Asia	Tajikistan	Fruit Primary	Fruits & Berries	1224567	1.5	1.83685	0.2078	0.2444	0.2659	0.381698	0.448926	0.488419
South East Asia	Thailand	Fruit Primary	Fruits & Berries	11325582	1.5	16.9884	0.2078	0.2444	0.2659	3.53018	4.15196	4.51721
South East Asia	Timor-Leste	Fruit Primary	Fruits & Berries	18205	1.5	0.0273075	0.2078	0.2444	0.2659	0.0056745	0.00667395	0.00726106
Central & West Asia	Turkey	Fruit Primary	Fruits & Berries	23598623	1.5	35.3979	0.2078	0.2444	0.2659	7.35569	8.65126	9.41231
Central & West Asia	Turkmenistan	Fruit Primary	Fruits & Berries	650279	1.5	0.975418	0.2078	0.2444	0.2659	0.202692	0.238392	0.259364
Central & West Asia	United Arab Emirates	Fruit Primary	Fruits & Berries	381310	1.5	0.571965	0.2078	0.2444	0.2659	0.118854	0.139788	0.152085
North America	United States of America	Fruit Primary	Fruits & Berries	26015063	1.5	39.0226	0.2078	0.2444	0.2659	8.1089	9.53712	10.3761
Latin America	Uruguay	Fruit Primary	Fruits & Berries	422651	1.5	0.633977	0.2078	0.2444	0.2659	0.13174	0.154944	0.168574
Central & West Asia	Uzbekistan	Fruit Primary	Fruits & Berries	6146230	1.5	9.21935	0.2078	0.2444	0.2659	1.91578	2.25321	2.45142
Latin America	Venezuela (Bolivarian Republic of)	Fruit Primary	Fruits & Berries	3275248	1.5	4.91287	0.2078	0.2444	0.2659	1.02089	1.20071	1.30633
South East Asia	Viet Nam	Fruit Primary	Fruits & Berries	9240654	1.5	13.861	0.2078	0.2444	0.2659	2.88031	3.38762	3.68563
Central & West Asia	Yemen	Fruit Primary	Fruits & Berries	1092839	1.5	1.63926	0.2078	0.2444	0.2659	0.340638	0.400635	0.435879
Pacific		Fruit Primary	Fruits & Berries	8069733	1.5	12.1046	0.2078	0.2444	0.2659	2.51534	2.95836	3.21861
Europe		Fruit Primary	Fruits & Berries	87574401	1.5	131.362	0.2078	0.2444	0.2659	27.2969	32.1048	34.929
Africa		Fruit Primary	Fruits & Berries	110610603	1.5	165.916	0.2078	0.2444	0.2659	34.4773	40.5498	44.117
Caribbean		Fruit Primary	Fruits & Berries	9295936	1.5	13.9439	0.2078	0.2444	0.2659	2.89754	3.40789	3.70768
World		Fruit Primary	Fruits & Berries	867774832	1.5	1301.66	0.2078	0.2444	0.2659	270.485	318.126	346.112
South Asia	Afghanistan	Fruit, citrus nes	Fruits & Berries	2802	1.5	0.004203	0.2078	0.2444	0.2659	0.000873383	0.00102721	0.00111758
Central & West Asia	Azerbaijan	Fruit, citrus nes	Fruits & Berries	4418	1.5	0.006627	0.2078	0.2444	0.2659	0.00137709	0.00161964	0.00176212
South Asia	Bhutan	Fruit, citrus nes	Fruits & Berries	14498	1.5	0.021747	0.2078	0.2444	0.2659	0.00451903	0.00531497	0.00578253
East Asia	China	Fruit, citrus nes	Fruits & Berries	5864891	1.5	8.79734	0.2078	0.2444	0.2659	1.82809	2.15007	2.33921
East Asia	Taiwan	Fruit, citrus nes	Fruits & Berries	71495	1.5	0.107243	0.2078	0.2444	0.2659	0.022285	0.0262101	0.0285158
Latin America	Colombia	Fruit, citrus nes	Fruits & Berries	602871	1.5	0.904307	0.2078	0.2444	0.2659	0.187915	0.221013	0.240455
Latin America	Ecuador	Fruit, citrus nes	Fruits & Berries	16678	1.5	0.025017	0.2078	0.2444	0.2659	0.00519853	0.00611415	0.00665202
Latin America	French Guyana	Fruit, citrus nes	Fruits & Berries	0	1.5	0	0.2078	0.2444	0.2659	0	0	0
Central & West Asia	Georgia	Fruit, citrus nes	Fruits & Berries		1.5	0	0.2078	0.2444	0.2659	0	0	0
Latin America	Guatemala	Fruit, citrus nes	Fruits & Berries	75006	1.5	0.112509	0.2078	0.2444	0.2659	0.0233794	0.0274972	0.0299161
Latin America	Guyana	Fruit, citrus nes	Fruits & Berries	778	1.5	0.001167	0.2078	0.2444	0.2659	0.000242503	0.000285215	0.000310305
Latin America	Honduras	Fruit, citrus nes	Fruits & Berries	887	1.5	0.0013305	0.2078	0.2444	0.2659	0.000276478	0.000325174	0.00035378
South Asia	India	Fruit, citrus nes	Fruits & Berries	773250	1.5	1.15987	0.2078	0.2444	0.2659	0.241022	0.283473	0.308411
Central & West Asia	Iran	Fruit, citrus nes	Fruits & Berries	616864	1.5	0.925296	0.2078	0.2444	0.2659	0.192277	0.226142	0.246036
Central & West Asia	Israel	Fruit, citrus nes	Fruits & Berries	22870	1.5	0.034305	0.2078	0.2444	0.2659	0.00712858	0.00838414	0.0091217
East Asia	Japan	Fruit, citrus nes	Fruits & Berries	69030	1.5	0.103545	0.2078	0.2444	0.2659	0.0215167	0.0253064	0.0275326
Central & West Asia	Jordan	Fruit, citrus nes	Fruits & Berries	722	1.5	0.001083	0.2078	0.2444	0.2659	0.000225047	0.000264685	0.00028797
Central & West Asia	Kazakhstan	Fruit, citrus nes	Fruits & Berries	806	1.5	0.001209	0.2078	0.2444	0.2659	0.00025123	0.00029548	0.000321473
Central & West Asia	Kyrgyzstan	Fruit, citrus nes	Fruits & Berries	89	1.5	0.0001335	0.2078	0.2444	0.2659	2.77413e-05	3.26274e-05	3.54977e-05
South East Asia	Malaysia	Fruit, citrus nes	Fruits & Berries	3432	1.5	0.005148	0.2078	0.2444	0.2659	0.00106975	0.00125817	0.00136885
Latin America	Mexico	Fruit, citrus nes	Fruits & Berries	184277	1.5	0.276415	0.2078	0.2444	0.2659	0.0574391	0.0675559	0.0734989
South Asia	Nepal	Fruit, citrus nes	Fruits & Berries	5752	1.5	0.008628	0.2078	0.2444	0.2659	0.0017929	0.00210868	0.00229419
Latin America	Nicaragua	Fruit, citrus nes	Fruits & Berries	576	1.5	0.000864	0.2078	0.2444	0.2659	0.000179539	0.000211162	0.000229738
South Asia	Pakistan	Fruit, citrus nes	Fruits & Berries		1.5	0	0.2078	0.2444	0.2659	0	0	0
Central & West Asia	Palestine	Fruit, citrus nes	Fruits & Berries	1338	1.5	0.002007	0.2078	0.2444	0.2659	0.000417055	0.000490511	0.000533661
Latin America	Peru	Fruit, citrus nes	Fruits & Berries	69030	1.5	0.103545	0.2078	0.2444	0.2659	0.0215167	0.0253064	0.0275326
South East Asia	Philippines	Fruit, citrus nes	Fruits & Berries	113552	1.5	0.170328	0.2078	0.2444	0.2659	0.0353942	0.0416282	0.0452902
Central & West Asia	Qatar	Fruit, citrus nes	Fruits & Berries	166	1.5	0.000249	0.2078	0.2444	0.2659	5.17422e-05	6.08556e-05	6.62091e-05
East Asia	Republic of Korea	Fruit, citrus nes	Fruits & Berries	1100	1.5	0.00165	0.2078	0.2444	0.2659	0.00034287	0.00040326	0.000438735
Central & West Asia	Saudi Arabia	Fruit, citrus nes	Fruits & Berries	40428	1.5	0.060642	0.2078	0.2444	0.2659	0.0126014	0.0148209	0.0161247
Latin America	Suriname	Fruit, citrus nes	Fruits & Berries	3808	1.5	0.005712	0.2078	0.2444	0.2659	0.00118695	0.00139601	0.00151882
Central & West Asia	Syria	Fruit, citrus nes	Fruits & Berries	195876	1.5	0.293814	0.2078	0.2444	0.2659	0.0610545	0.0718081	0.0781251
South East Asia	Thailand	Fruit, citrus nes	Fruits & Berries	14088	1.5	0.021132	0.2078	0.2444	0.2659	0.00439123	0.00516466	0.005619
Central & West Asia	Turkey	Fruit, citrus nes	Fruits & Berries	2052	1.5	0.003078	0.2078	0.2444	0.2659	0.000639608	0.000752263	0.00081844
Central & West Asia	United Arab Emirates	Fruit, citrus nes	Fruits & Berries	2806	1.5	0.004209	0.2078	0.2444	0.2659	0.00087463	0.00102868	0.00111917
North America	United States of America	Fruit, citrus nes	Fruits & Berries	28514	1.5	0.042771	0.2078	0.2444	0.2659	0.00888781	0.0104532	0.0113728
Central & West Asia	Uzbekistan	Fruit, citrus nes	Fruits & Berries	11863	1.5	0.0177945	0.2078	0.2444	0.2659	0.0036977	0.00434898	0.00473156
Central & West Asia	Yemen	Fruit, citrus nes	Fruits & Berries	275	1.5	0.0004125	0.2078	0.2444	0.2659	8.57175e-05	0.000100815	0.000109684
Pacific		Fruit, citrus nes	Fruits & Berries	11491	1.5	0.0172365	0.2078	0.2444	0.2659	0.00358174	0.0042126	0.00458319
Europe		Fruit, citrus nes	Fruits & Berries	31633	1.5	0.0474495	0.2078	0.2444	0.2659	0.00986001	0.0115967	0.0126168
Africa		Fruit, citrus nes	Fruits & Berries	5099243	1.5	7.64886	0.2078	0.2444	0.2659	1.58943	1.86938	2.03383
Caribbean		Fruit, citrus nes	Fruits & Berries	10337	1.5	0.0155055	0.2078	0.2444	0.2659	0.00322204	0.00378954	0.00412291
World		Fruit, citrus nes	Fruits & Berries	13898418	1.5	20.8476	0.2078	0.2444	0.2659	4.33214	5.09516	5.54338
South Asia	Afghanistan	Fruit, fresh nes	Fruits & Berries	63702	1.5	0.095553	0.2078	0.2444	0.2659	0.0198559	0.0233532	0.0254075
Central & West Asia	Armenia	Fruit, fresh nes	Fruits & Berries	1267	1.5	0.0019005	0.2078	0.2444	0.2659	0.000394924	0.000464482	0.000505343
Central & West Asia	Azerbaijan	Fruit, fresh nes	Fruits & Berries	188672	1.5	0.283008	0.2078	0.2444	0.2659	0.0588091	0.0691672	0.0752518
Central & West Asia	Bahrain	Fruit, fresh nes	Fruits & Berries	5564	1.5	0.008346	0.2078	0.2444	0.2659	0.0017343	0.00203976	0.0022192
South Asia	Bangladesh	Fruit, fresh nes	Fruits & Berries	664103	1.5	0.996155	0.2078	0.2444	0.2659	0.207001	0.24346	0.264877
Latin America	Belize	Fruit, fresh nes	Fruits & Berries	6436	1.5	0.009654	0.2078	0.2444	0.2659	0.0020061	0.00235944	0.002567
South Asia	Bhutan	Fruit, fresh nes	Fruits & Berries	3373	1.5	0.0050595	0.2078	0.2444	0.2659	0.00105136	0.00123654	0.00134532
Latin America	Bolivia (Plurinational State of)	Fruit, fresh nes	Fruits & Berries	3091	1.5	0.0046365	0.2078	0.2444	0.2659	0.000963465	0.00113316	0.00123285
South East Asia	Brunei	Fruit, fresh nes	Fruits & Berries	4493	1.5	0.0067395	0.2078	0.2444	0.2659	0.00140047	0.00164713	0.00179203
South East Asia	Cambodia	Fruit, fresh nes	Fruits & Berries	74197	1.5	0.111296	0.2078	0.2444	0.2659	0.0231272	0.0272006	0.0295935
North America	Canada	Fruit, fresh nes	Fruits & Berries	0	1.5	0	0.2078	0.2444	0.2659	0	0	0
Latin America	Chile	Fruit, fresh nes	Fruits & Berries	14786	1.5	0.022179	0.2078	0.2444	0.2659	0.0046088	0.00542055	0.0058974
East Asia	China	Fruit, fresh nes	Fruits & Berries	3000820	1.5	4.50123	0.2078	0.2444	0.2659	0.935356	1.1001	1.19688
East Asia	Hong Kong	Fruit, fresh nes	Fruits & Berries	5033	1.5	0.0075495	0.2078	0.2444	0.2659	0.00156879	0.0018451	0.00200741
East Asia	Taiwan	Fruit, fresh nes	Fruits & Berries	155143	1.5	0.232714	0.2078	0.2444	0.2659	0.0483581	0.0568754	0.0618788
Latin America	Colombia	Fruit, fresh nes	Fruits & Berries	732730	1.5	1.09909	0.2078	0.2444	0.2659	0.228392	0.268619	0.292249
Latin America	Costa Rica	Fruit, fresh nes	Fruits & Berries	276533	1.5	0.414799	0.2078	0.2444	0.2659	0.0861953	0.101377	0.110295
East Asia	Democratic People's Republic of Korea	Fruit, fresh nes	Fruits & Berries	560459	1.5	0.840688	0.2078	0.2444	0.2659	0.174695	0.205464	0.223539
Latin America	Ecuador	Fruit, fresh nes	Fruits & Berries	232387	1.5	0.348581	0.2078	0.2444	0.2659	0.072435	0.0851931	0.0926876
Latin America	El Salvador	Fruit, fresh nes	Fruits & Berries	13271	1.5	0.0199065	0.2078	0.2444	0.2659	0.00413657	0.00486515	0.00529314
Latin America	French Guyana	Fruit, fresh nes	Fruits & Berries	113	1.5	0.0001695	0.2078	0.2444	0.2659	3.52221e-05	4.14258e-05	4.50701e-05
Central & West Asia	Georgia	Fruit, fresh nes	Fruits & Berries	16400	1.5	0.0246	0.2078	0.2444	0.2659	0.00511188	0.00601224	0.00654114
Latin America	Guatemala	Fruit, fresh nes	Fruits & Berries	101679	1.5	0.152519	0.2078	0.2444	0.2659	0.0316933	0.0372755	0.0405547
Latin America	Guyana	Fruit, fresh nes	Fruits & Berries	717	1.5	0.0010755	0.2078	0.2444	0.2659	0.000223489	0.000262852	0.000285975
Latin America	Honduras	Fruit, fresh nes	Fruits & Berries	83623	1.5	0.125435	0.2078	0.2444	0.2659	0.0260653	0.0306562	0.033353
South Asia	India	Fruit, fresh nes	Fruits & Berries	10043008	1.5	15.0645	0.2078	0.2444	0.2659	3.13041	3.68177	4.00565
South East Asia	Indonesia	Fruit, fresh nes	Fruits & Berries	1340787	1.5	2.01118	0.2078	0.2444	0.2659	0.417923	0.491533	0.534773
Central & West Asia	Iran	Fruit, fresh nes	Fruits & Berries	583980	1.5	0.87597	0.2078	0.2444	0.2659	0.182027	0.214087	0.23292
Central & West Asia	Iraq	Fruit, fresh nes	Fruits & Berries	72984	1.5	0.109476	0.2078	0.2444	0.2659	0.0227491	0.0267559	0.0291097
Central & West Asia	Israel	Fruit, fresh nes	Fruits & Berries	81392	1.5	0.122088	0.2078	0.2444	0.2659	0.0253699	0.0298383	0.0324632
East Asia	Japan	Fruit, fresh nes	Fruits & Berries		1.5	0	0.2078	0.2444	0.2659	0	0	0
Central & West Asia	Jordan	Fruit, fresh nes	Fruits & Berries	29323	1.5	0.0439845	0.2078	0.2444	0.2659	0.00913998	0.0107498	0.0116955
Central & West Asia	Kazakhstan	Fruit, fresh nes	Fruits & Berries	12748	1.5	0.019122	0.2078	0.2444	0.2659	0.00397355	0.00467342	0.00508454
Central & West Asia	Kuwait	Fruit, fresh nes	Fruits & Berries	3340	1.5	0.00501	0.2078	0.2444	0.2659	0.00104108	0.00122444	0.00133216
Central & West Asia	Kyrgyzstan	Fruit, fresh nes	Fruits & Berries	9911	1.5	0.0148665	0.2078	0.2444	0.2659	0.00308926	0.00363337	0.003953
South East Asia	Laos	Fruit, fresh nes	Fruits & Berries	46118	1.5	0.069177	0.2078	0.2444	0.2659	0.014375	0.0169069	0.0183942
Central & West Asia	Lebanon	Fruit, fresh nes	Fruits & Berries	42078	1.5	0.063117	0.2078	0.2444	0.2659	0.0131157	0.0154258	0.0167828
South East Asia	Malaysia	Fruit, fresh nes	Fruits & Berries	110967	1.5	0.166451	0.2078	0.2444	0.2659	0.0345884	0.0406805	0.0442592
South Asia	Maldives	Fruit, fresh nes	Fruits & Berries	2057	1.5	0.0030855	0.2078	0.2444	0.2659	0.000641167	0.000754096	0.000820434
Latin America	Mexico	Fruit, fresh nes	Fruits & Berries	527028	1.5	0.790542	0.2078	0.2444	0.2659	0.164275	0.193208	0.210205
East Asia	Mongolia	Fruit, fresh nes	Fruits & Berries	1701	1.5	0.0025515	0.2078	0.2444	0.2659	0.000530202	0.000623587	0.000678444
South East Asia	Myanmar	Fruit, fresh nes	Fruits & Berries	1429519	1.5	2.14428	0.2078	0.2444	0.2659	0.445581	0.524062	0.570164
South Asia	Nepal	Fruit, fresh nes	Fruits & Berries	399276	1.5	0.598914	0.2078	0.2444	0.2659	0.124454	0.146375	0.159251
Latin America	Nicaragua	Fruit, fresh nes	Fruits & Berries	17944	1.5	0.026916	0.2078	0.2444	0.2659	0.00559314	0.00657827	0.00715696
Central & West Asia	Oman	Fruit, fresh nes	Fruits & Berries		1.5	0	0.2078	0.2444	0.2659	0	0	0
South Asia	Pakistan	Fruit, fresh nes	Fruits & Berries	174880	1.5	0.26232	0.2078	0.2444	0.2659	0.0545101	0.064111	0.0697509
Central & West Asia	Palestine	Fruit, fresh nes	Fruits & Berries	6652	1.5	0.009978	0.2078	0.2444	0.2659	0.00207343	0.00243862	0.00265315
Latin America	Panama	Fruit, fresh nes	Fruits & Berries		1.5	0	0.2078	0.2444	0.2659	0	0	0
Latin America	Paraguay	Fruit, fresh nes	Fruits & Berries	14204	1.5	0.021306	0.2078	0.2444	0.2659	0.00442739	0.00520719	0.00566527
Latin America	Peru	Fruit, fresh nes	Fruits & Berries	86573	1.5	0.129859	0.2078	0.2444	0.2659	0.0269848	0.0317377	0.0345296
South East Asia	Philippines	Fruit, fresh nes	Fruits & Berries	220826	1.5	0.331239	0.2078	0.2444	0.2659	0.0688315	0.0809548	0.0880765
Central & West Asia	Qatar	Fruit, fresh nes	Fruits & Berries	91	1.5	0.0001365	0.2078	0.2444	0.2659	2.83647e-05	3.33606e-05	3.62954e-05
East Asia	Republic of Korea	Fruit, fresh nes	Fruits & Berries	172393	1.5	0.25859	0.2078	0.2444	0.2659	0.0537349	0.0631993	0.0687589
Central & West Asia	Saudi Arabia	Fruit, fresh nes	Fruits & Berries	214406	1.5	0.321609	0.2078	0.2444	0.2659	0.0668304	0.0786012	0.0855158
South East Asia	Singapore	Fruit, fresh nes	Fruits & Berries	10	1.5	1.5e-05	0.2078	0.2444	0.2659	3.117e-06	3.666e-06	3.9885e-06
South Asia	Sri Lanka	Fruit, fresh nes	Fruits & Berries	65870	1.5	0.098805	0.2078	0.2444	0.2659	0.0205317	0.0241479	0.0262722
Central & West Asia	Syria	Fruit, fresh nes	Fruits & Berries	84806	1.5	0.127209	0.2078	0.2444	0.2659	0.026434	0.0310899	0.0338249
Central & West Asia	Tajikistan	Fruit, fresh nes	Fruits & Berries	29849	1.5	0.0447735	0.2078	0.2444	0.2659	0.00930393	0.0109426	0.0119053
South East Asia	Thailand	Fruit, fresh nes	Fruits & Berries	604876	1.5	0.907314	0.2078	0.2444	0.2659	0.18854	0.221748	0.241255
Central & West Asia	Turkey	Fruit, fresh nes	Fruits & Berries	537847	1.5	0.80677	0.2078	0.2444	0.2659	0.167647	0.197175	0.21452
Central & West Asia	United Arab Emirates	Fruit, fresh nes	Fruits & Berries	10289	1.5	0.0154335	0.2078	0.2444	0.2659	0.00320708	0.00377195	0.00410377
North America	United States of America	Fruit, fresh nes	Fruits & Berries	670	1.5	0.001005	0.2078	0.2444	0.2659	0.000208839	0.000245622	0.00026723
Latin America	Uruguay	Fruit, fresh nes	Fruits & Berries	5000	1.5	0.0075	0.2078	0.2444	0.2659	0.0015585	0.001833	0.00199425
Central & West Asia	Uzbekistan	Fruit, fresh nes	Fruits & Berries	163347	1.5	0.245021	0.2078	0.2444	0.2659	0.0509153	0.059883	0.065151
Latin America	Venezuela (Bolivarian Republic of)	Fruit, fresh nes	Fruits & Berries	100505	1.5	0.150757	0.2078	0.2444	0.2659	0.0313274	0.0368451	0.0400864
South East Asia	Viet Nam	Fruit, fresh nes	Fruits & Berries	2835078	1.5	4.25262	0.2078	0.2444	0.2659	0.883694	1.03934	1.13077
Central & West Asia	Yemen	Fruit, fresh nes	Fruits & Berries	33516	1.5	0.050274	0.2078	0.2444	0.2659	0.0104469	0.012287	0.0133679
Pacific		Fruit, fresh nes	Fruits & Berries	1190132	1.5	1.7852	0.2078	0.2444	0.2659	0.370964	0.436302	0.474684
Europe		Fruit, fresh nes	Fruits & Berries	541018	1.5	0.811527	0.2078	0.2444	0.2659	0.168635	0.198337	0.215785
Africa		Fruit, fresh nes	Fruits & Berries	5647547	1.5	8.47132	0.2078	0.2444	0.2659	1.76034	2.07039	2.25252
Caribbean		Fruit, fresh nes	Fruits & Berries	378085	1.5	0.567128	0.2078	0.2444	0.2659	0.117849	0.138606	0.150799
World		Fruit, fresh nes	Fruits & Berries	33922019	1.5	50.883	0.2078	0.2444	0.2659	10.5735	12.4358	13.5298
Central & West Asia	Uzbekistan	Fruit, pome nes	Fruits & Berries	58313	1.5	0.0874695	0.2078	0.2444	0.2659	0.0181762	0.0213775	0.0232581
Europe		Fruit, pome nes	Fruits & Berries	800	1.5	0.0012	0.2078	0.2444	0.2659	0.00024936	0.00029328	0.00031908
World		Fruit, pome nes	Fruits & Berries	59113	1.5	0.0886695	0.2078	0.2444	0.2659	0.0184255	0.0216708	0.0235772
South Asia	Afghanistan	Fruit, stone nes	Fruits & Berries	52171	1.5	0.0782565	0.2078	0.2444	0.2659	0.0162617	0.0191259	0.0208084
Central & West Asia	Armenia	Fruit, stone nes	Fruits & Berries		1.5	0	0.2078	0.2444	0.2659	0	0	0
Latin America	Brazil	Fruit, stone nes	Fruits & Berries		1.5	0	0.2078	0.2444	0.2659	0	0	0
East Asia	China	Fruit, stone nes	Fruits & Berries	167011	1.5	0.250516	0.2078	0.2444	0.2659	0.0520573	0.0612262	0.0666123
Central & West Asia	Georgia	Fruit, stone nes	Fruits & Berries	11800	1.5	0.0177	0.2078	0.2444	0.2659	0.00367806	0.00432588	0.00470643
South Asia	India	Fruit, stone nes	Fruits & Berries	2407	1.5	0.0036105	0.2078	0.2444	0.2659	0.000750262	0.000882406	0.000960032
Central & West Asia	Iran	Fruit, stone nes	Fruits & Berries	135884	1.5	0.203826	0.2078	0.2444	0.2659	0.042355	0.0498151	0.0541973
Central & West Asia	Israel	Fruit, stone nes	Fruits & Berries	0	1.5	0	0.2078	0.2444	0.2659	0	0	0
East Asia	Japan	Fruit, stone nes	Fruits & Berries	2790	1.5	0.004185	0.2078	0.2444	0.2659	0.000869643	0.00102281	0.00111279
South East Asia	Laos	Fruit, stone nes	Fruits & Berries	12169	1.5	0.0182535	0.2078	0.2444	0.2659	0.00379308	0.00446116	0.00485361
Central & West Asia	Syria	Fruit, stone nes	Fruits & Berries	4897	1.5	0.0073455	0.2078	0.2444	0.2659	0.00152639	0.00179524	0.00195317
Central & West Asia	Turkey	Fruit, stone nes	Fruits & Berries	15462	1.5	0.023193	0.2078	0.2444	0.2659	0.00481951	0.00566837	0.00616702
Central & West Asia	Uzbekistan	Fruit, stone nes	Fruits & Berries	72485	1.5	0.108728	0.2078	0.2444	0.2659	0.0225936	0.026573	0.0289106
Central & West Asia	Yemen	Fruit, stone nes	Fruits & Berries	2118	1.5	0.003177	0.2078	0.2444	0.2659	0.000660181	0.000776459	0.000844764
Pacific		Fruit, stone nes	Fruits & Berries	2542	1.5	0.003813	0.2078	0.2444	0.2659	0.000792341	0.000931897	0.00101388
Europe		Fruit, stone nes	Fruits & Berries	59621	1.5	0.0894315	0.2078	0.2444	0.2659	0.0185839	0.0218571	0.0237798
Africa		Fruit, stone nes	Fruits & Berries	41291	1.5	0.0619365	0.2078	0.2444	0.2659	0.0128704	0.0151373	0.0164689
World		Fruit, stone nes	Fruits & Berries	582648	1.5	0.873972	0.2078	0.2444	0.2659	0.181611	0.213599	0.232389
Central & West Asia	Armenia	Fruit, tropical fresh nes	Fruits & Berries	4424	1.5	0.006636	0.2078	0.2444	0.2659	0.00137896	0.00162184	0.00176451
South Asia	Bangladesh	Fruit, tropical fresh nes	Fruits & Berries	1057143	1.5	1.58571	0.2078	0.2444	0.2659	0.329511	0.387549	0.421641
Latin America	Brazil	Fruit, tropical fresh nes	Fruits & Berries	602651	1.5	0.903976	0.2078	0.2444	0.2659	0.187846	0.220932	0.240367
East Asia	China	Fruit, tropical fresh nes	Fruits & Berries	4253043	1.5	6.37956	0.2078	0.2444	0.2659	1.32567	1.55917	1.69633
East Asia	Taiwan	Fruit, tropical fresh nes	Fruits & Berries	449089	1.5	0.673633	0.2078	0.2444	0.2659	0.139981	0.164636	0.179119
Latin America	Colombia	Fruit, tropical fresh nes	Fruits & Berries	629090	1.5	0.943635	0.2078	0.2444	0.2659	0.196087	0.230624	0.250913
Latin America	Costa Rica	Fruit, tropical fresh nes	Fruits & Berries	8395	1.5	0.0125925	0.2078	0.2444	0.2659	0.00261672	0.00307761	0.00334835
Latin America	Ecuador	Fruit, tropical fresh nes	Fruits & Berries	55049	1.5	0.0825735	0.2078	0.2444	0.2659	0.0171588	0.020181	0.0219563
Latin America	French Guyana	Fruit, tropical fresh nes	Fruits & Berries	7850	1.5	0.011775	0.2078	0.2444	0.2659	0.00244685	0.00287781	0.00313097
Latin America	Guyana	Fruit, tropical fresh nes	Fruits & Berries	9512	1.5	0.014268	0.2078	0.2444	0.2659	0.00296489	0.0034871	0.00379386
South Asia	India	Fruit, tropical fresh nes	Fruits & Berries	5916000	1.5	8.874	0.2078	0.2444	0.2659	1.84402	2.16881	2.3596
South East Asia	Indonesia	Fruit, tropical fresh nes	Fruits & Berries	2533498	1.5	3.80025	0.2078	0.2444	0.2659	0.789691	0.92878	1.01049
Central & West Asia	Iran	Fruit, tropical fresh nes	Fruits & Berries	723437	1.5	1.08516	0.2078	0.2444	0.2659	0.225495	0.265212	0.288543
Central & West Asia	Israel	Fruit, tropical fresh nes	Fruits & Berries	244	1.5	0.000366	0.2078	0.2444	0.2659	7.60548e-05	8.94504e-05	9.73194e-05
Central & West Asia	Jordan	Fruit, tropical fresh nes	Fruits & Berries	2740	1.5	0.00411	0.2078	0.2444	0.2659	0.000854058	0.00100448	0.00109285
South East Asia	Malaysia	Fruit, tropical fresh nes	Fruits & Berries	73315	1.5	0.109973	0.2078	0.2444	0.2659	0.0228523	0.0268773	0.0292417
Latin America	Mexico	Fruit, tropical fresh nes	Fruits & Berries	479097	1.5	0.718646	0.2078	0.2444	0.2659	0.149335	0.175637	0.191088
South East Asia	Myanmar	Fruit, tropical fresh nes	Fruits & Berries	6951	1.5	0.0104265	0.2078	0.2444	0.2659	0.00216663	0.00254824	0.00277241
South Asia	Pakistan	Fruit, tropical fresh nes	Fruits & Berries	433092	1.5	0.649638	0.2078	0.2444	0.2659	0.134995	0.158772	0.172739
Latin America	Paraguay	Fruit, tropical fresh nes	Fruits & Berries	20289	1.5	0.0304335	0.2078	0.2444	0.2659	0.00632408	0.00743795	0.00809227
Latin America	Peru	Fruit, tropical fresh nes	Fruits & Berries	204885	1.5	0.307327	0.2078	0.2444	0.2659	0.0638627	0.0751108	0.0817184
South East Asia	Philippines	Fruit, tropical fresh nes	Fruits & Berries	3227089	1.5	4.84063	0.2078	0.2444	0.2659	1.00588	1.18305	1.28712
Latin America	Suriname	Fruit, tropical fresh nes	Fruits & Berries	177	1.5	0.0002655	0.2078	0.2444	0.2659	5.51709e-05	6.48882e-05	7.05965e-05
South East Asia	Thailand	Fruit, tropical fresh nes	Fruits & Berries	2340218	1.5	3.51033	0.2078	0.2444	0.2659	0.729446	0.857924	0.933396
South East Asia	Timor-Leste	Fruit, tropical fresh nes	Fruits & Berries	833	1.5	0.0012495	0.2078	0.2444	0.2659	0.000259646	0.000305378	0.000332242
Central & West Asia	Turkey	Fruit, tropical fresh nes	Fruits & Berries		1.5	0	0.2078	0.2444	0.2659	0	0	0
Central & West Asia	United Arab Emirates	Fruit, tropical fresh nes	Fruits & Berries		1.5	0	0.2078	0.2444	0.2659	0	0	0
Latin America	Venezuela (Bolivarian Republic of)	Fruit, tropical fresh nes	Fruits & Berries	95800	1.5	0.1437	0.2078	0.2444	0.2659	0.0298609	0.0351203	0.0382098
Central & West Asia	Yemen	Fruit, tropical fresh nes	Fruits & Berries	3305	1.5	0.0049575	0.2078	0.2444	0.2659	0.00103017	0.00121161	0.0013182
Pacific		Fruit, tropical fresh nes	Fruits & Berries	35185	1.5	0.0527775	0.2078	0.2444	0.2659	0.0109672	0.0128988	0.0140335
Europe		Fruit, tropical fresh nes	Fruits & Berries	190144	1.5	0.285216	0.2078	0.2444	0.2659	0.0592679	0.0697068	0.0758389
Africa		Fruit, tropical fresh nes	Fruits & Berries	861124	1.5	1.29169	0.2078	0.2444	0.2659	0.268412	0.315688	0.343459
Caribbean		Fruit, tropical fresh nes	Fruits & Berries	98626	1.5	0.147939	0.2078	0.2444	0.2659	0.0307417	0.0361563	0.039337
World		Fruit, tropical fresh nes	Fruits & Berries	23874678	1.5	35.812	0.2078	0.2444	0.2659	7.44174	8.75246	9.52242
Central & West Asia	Kyrgyzstan	Gooseberries	Fruits & Berries	120	1.5	0.00018	0.2078	0.2444	0.2659	3.7404e-05	4.3992e-05	4.7862e-05
Pacific		Gooseberries	Fruits & Berries	8	1.5	1.2e-05	0.2078	0.2444	0.2659	2.4936e-06	2.9328e-06	3.1908e-06
Europe		Gooseberries	Fruits & Berries	176235	1.5	0.264352	0.2078	0.2444	0.2659	0.0549324	0.0646078	0.0702913
World		Gooseberries	Fruits & Berries	176362	1.5	0.264543	0.2078	0.2444	0.2659	0.054972	0.0646543	0.070342
Latin America	Argentina	Grapefruit (inc. pomelos)	Fruits & Berries	114118	1.5	0.171177	0.2078	0.2444	0.2659	0.0355706	0.0418357	0.045516
South Asia	Bangladesh	Grapefruit (inc. pomelos)	Fruits & Berries	68137	1.5	0.102206	0.2078	0.2444	0.2659	0.0212383	0.024979	0.0271764
Latin America	Belize	Grapefruit (inc. pomelos)	Fruits & Berries	7456	1.5	0.011184	0.2078	0.2444	0.2659	0.00232404	0.00273337	0.00297383
Latin America	Bolivia (Plurinational State of)	Grapefruit (inc. pomelos)	Fruits & Berries	3749	1.5	0.0056235	0.2078	0.2444	0.2659	0.00116856	0.00137438	0.00149529
Latin America	Brazil	Grapefruit (inc. pomelos)	Fruits & Berries	81931	1.5	0.122897	0.2078	0.2444	0.2659	0.0255379	0.0300359	0.0326782
South East Asia	Cambodia	Grapefruit (inc. pomelos)	Fruits & Berries	3289	1.5	0.0049335	0.2078	0.2444	0.2659	0.00102518	0.00120575	0.00131182
Latin America	Chile	Grapefruit (inc. pomelos)	Fruits & Berries	1125	1.5	0.0016875	0.2078	0.2444	0.2659	0.000350663	0.000412425	0.000448706
East Asia	China	Grapefruit (inc. pomelos)	Fruits & Berries	5056331	1.5	7.5845	0.2078	0.2444	0.2659	1.57606	1.85365	2.01672
East Asia	Taiwan	Grapefruit (inc. pomelos)	Fruits & Berries	90563	1.5	0.135845	0.2078	0.2444	0.2659	0.0282285	0.0332004	0.0361211
Latin America	Costa Rica	Grapefruit (inc. pomelos)	Fruits & Berries	21528	1.5	0.032292	0.2078	0.2444	0.2659	0.00671028	0.00789216	0.00858644
Latin America	Ecuador	Grapefruit (inc. pomelos)	Fruits & Berries	4777	1.5	0.0071655	0.2078	0.2444	0.2659	0.00148899	0.00175125	0.00190531
Latin America	French Guyana	Grapefruit (inc. pomelos)	Fruits & Berries	1170	1.5	0.001755	0.2078	0.2444	0.2659	0.000364689	0.000428922	0.000466655
Latin America	Guyana	Grapefruit (inc. pomelos)	Fruits & Berries	1345	1.5	0.0020175	0.2078	0.2444	0.2659	0.000419237	0.000493077	0.000536453
Latin America	Honduras	Grapefruit (inc. pomelos)	Fruits & Berries	24059	1.5	0.0360885	0.2078	0.2444	0.2659	0.00749919	0.00882003	0.00959593
South Asia	India	Grapefruit (inc. pomelos)	Fruits & Berries	257750	1.5	0.386625	0.2078	0.2444	0.2659	0.0803407	0.0944911	0.102804
Central & West Asia	Iran	Grapefruit (inc. pomelos)	Fruits & Berries	69809	1.5	0.104714	0.2078	0.2444	0.2659	0.0217595	0.025592	0.0278433
Central & West Asia	Iraq	Grapefruit (inc. pomelos)	Fruits & Berries	250	1.5	0.000375	0.2078	0.2444	0.2659	7.7925e-05	9.165e-05	9.97125e-05
Central & West Asia	Israel	Grapefruit (inc. pomelos)	Fruits & Berries	148896	1.5	0.223344	0.2078	0.2444	0.2659	0.0464109	0.0545853	0.0593872
Central & West Asia	Jordan	Grapefruit (inc. pomelos)	Fruits & Berries	6653	1.5	0.0099795	0.2078	0.2444	0.2659	0.00207374	0.00243899	0.00265355
South East Asia	Laos	Grapefruit (inc. pomelos)	Fruits & Berries	6373	1.5	0.0095595	0.2078	0.2444	0.2659	0.00198646	0.00233634	0.00254187
Central & West Asia	Lebanon	Grapefruit (inc. pomelos)	Fruits & Berries	7135	1.5	0.0107025	0.2078	0.2444	0.2659	0.00222398	0.00261569	0.00284579
South East Asia	Malaysia	Grapefruit (inc. pomelos)	Fruits & Berries	12794	1.5	0.019191	0.2078	0.2444	0.2659	0.00398789	0.00469028	0.00510289
Latin America	Mexico	Grapefruit (inc. pomelos)	Fruits & Berries	459610	1.5	0.689415	0.2078	0.2444	0.2659	0.14326	0.168493	0.183315
South Asia	Pakistan	Grapefruit (inc. pomelos)	Fruits & Berries		1.5	0	0.2078	0.2444	0.2659	0	0	0
Central & West Asia	Palestine	Grapefruit (inc. pomelos)	Fruits & Berries	385	1.5	0.0005775	0.2078	0.2444	0.2659	0.000120005	0.000141141	0.000153557
Latin America	Paraguay	Grapefruit (inc. pomelos)	Fruits & Berries	50020	1.5	0.07503	0.2078	0.2444	0.2659	0.0155912	0.0183373	0.0199505
Latin America	Peru	Grapefruit (inc. pomelos)	Fruits & Berries	6680	1.5	0.01002	0.2078	0.2444	0.2659	0.00208216	0.00244889	0.00266432
South East Asia	Philippines	Grapefruit (inc. pomelos)	Fruits & Berries	26934	1.5	0.040401	0.2078	0.2444	0.2659	0.00839533	0.009874	0.0107426
Latin America	Suriname	Grapefruit (inc. pomelos)	Fruits & Berries	1677	1.5	0.0025155	0.2078	0.2444	0.2659	0.000522721	0.000614788	0.000668871
Central & West Asia	Syria	Grapefruit (inc. pomelos)	Fruits & Berries	46887	1.5	0.0703305	0.2078	0.2444	0.2659	0.0146147	0.0171888	0.0187009
South East Asia	Thailand	Grapefruit (inc. pomelos)	Fruits & Berries	219838	1.5	0.329757	0.2078	0.2444	0.2659	0.0685235	0.0805926	0.0876824
Central & West Asia	Turkey	Grapefruit (inc. pomelos)	Fruits & Berries	250000	1.5	0.375	0.2078	0.2444	0.2659	0.077925	0.09165	0.0997125
North America	United States of America	Grapefruit (inc. pomelos)	Fruits & Berries	558830	1.5	0.838245	0.2078	0.2444	0.2659	0.174187	0.204867	0.222889
Latin America	Uruguay	Grapefruit (inc. pomelos)	Fruits & Berries	886	1.5	0.001329	0.2078	0.2444	0.2659	0.000276166	0.000324808	0.000353381
Central & West Asia	Uzbekistan	Grapefruit (inc. pomelos)	Fruits & Berries	2633	1.5	0.0039495	0.2078	0.2444	0.2659	0.000820706	0.000965258	0.00105017
Latin America	Venezuela (Bolivarian Republic of)	Grapefruit (inc. pomelos)	Fruits & Berries	7875	1.5	0.0118125	0.2078	0.2444	0.2659	0.00245464	0.00288697	0.00314094
South East Asia	Viet Nam	Grapefruit (inc. pomelos)	Fruits & Berries	657660	1.5	0.98649	0.2078	0.2444	0.2659	0.204993	0.241098	0.262308
Pacific		Grapefruit (inc. pomelos)	Fruits & Berries	10724	1.5	0.016086	0.2078	0.2444	0.2659	0.00334267	0.00393142	0.00427727
Europe		Grapefruit (inc. pomelos)	Fruits & Berries	86971	1.5	0.130457	0.2078	0.2444	0.2659	0.0271089	0.0318836	0.0346884
Africa		Grapefruit (inc. pomelos)	Fruits & Berries	924960	1.5	1.38744	0.2078	0.2444	0.2659	0.28831	0.33909	0.36892
Caribbean		Grapefruit (inc. pomelos)	Fruits & Berries	144279	1.5	0.216419	0.2078	0.2444	0.2659	0.0449718	0.0528927	0.0575457
World		Grapefruit (inc. pomelos)	Fruits & Berries	9374739	1.5	14.0621	0.2078	0.2444	0.2659	2.92211	3.43678	3.73911
South Asia	Afghanistan	Grapes	Fruits & Berries	984081	1.5	1.47612	0.2078	0.2444	0.2659	0.306738	0.360764	0.392501
Latin America	Argentina	Grapes	Fruits & Berries	2573311	1.5	3.85997	0.2078	0.2444	0.2659	0.802101	0.943376	1.02637
Central & West Asia	Armenia	Grapes	Fruits & Berries	179668	1.5	0.269502	0.2078	0.2444	0.2659	0.0560025	0.0658663	0.0716606
Central & West Asia	Azerbaijan	Grapes	Fruits & Berries	167591	1.5	0.251387	0.2078	0.2444	0.2659	0.0522381	0.0614389	0.0668437
Central & West Asia	Bahrain	Grapes	Fruits & Berries	151	1.5	0.0002265	0.2078	0.2444	0.2659	4.70667e-05	5.53566e-05	6.02264e-05
Latin America	Bolivia (Plurinational State of)	Grapes	Fruits & Berries	22674	1.5	0.034011	0.2078	0.2444	0.2659	0.00706749	0.00831229	0.00904352
Latin America	Brazil	Grapes	Fruits & Berries	1591986	1.5	2.38798	0.2078	0.2444	0.2659	0.496222	0.583622	0.634964
North America	Canada	Grapes	Fruits & Berries	120293	1.5	0.18044	0.2078	0.2444	0.2659	0.0374953	0.0440994	0.0479789
Latin America	Chile	Grapes	Fruits & Berries	2500000	1.5	3.75	0.2078	0.2444	0.2659	0.77925	0.9165	0.997125
East Asia	China	Grapes	Fruits & Berries	13494811	1.5	20.2422	0.2078	0.2444	0.2659	4.20633	4.9472	5.38241
East Asia	Taiwan	Grapes	Fruits & Berries	97799	1.5	0.146699	0.2078	0.2444	0.2659	0.0304839	0.0358531	0.0390071
Latin America	Colombia	Grapes	Fruits & Berries	24844	1.5	0.037266	0.2078	0.2444	0.2659	0.00774387	0.00910781	0.00990903
Latin America	Ecuador	Grapes	Fruits & Berries	519	1.5	0.0007785	0.2078	0.2444	0.2659	0.000161772	0.000190265	0.000207003
Central & West Asia	Georgia	Grapes	Fruits & Berries	259900	1.5	0.38985	0.2078	0.2444	0.2659	0.0810108	0.0952793	0.103661
Latin America	Guatemala	Grapes	Fruits & Berries	20099	1.5	0.0301485	0.2078	0.2444	0.2659	0.00626486	0.00736829	0.00801649
Latin America	Honduras	Grapes	Fruits & Berries	180	1.5	0.00027	0.2078	0.2444	0.2659	5.6106e-05	6.5988e-05	7.1793e-05
South Asia	India	Grapes	Fruits & Berries	2920000	1.5	4.38	0.2078	0.2444	0.2659	0.910164	1.07047	1.16464
Central & West Asia	Iran	Grapes	Fruits & Berries	2032031	1.5	3.04805	0.2078	0.2444	0.2659	0.633384	0.744943	0.810476
Central & West Asia	Iraq	Grapes	Fruits & Berries	95725	1.5	0.143588	0.2078	0.2444	0.2659	0.0298375	0.0350928	0.0381799
Central & West Asia	Israel	Grapes	Fruits & Berries	63000	1.5	0.0945	0.2078	0.2444	0.2659	0.0196371	0.0230958	0.0251276
East Asia	Japan	Grapes	Fruits & Berries	174700	1.5	0.26205	0.2078	0.2444	0.2659	0.054454	0.064045	0.0696791
Central & West Asia	Jordan	Grapes	Fruits & Berries	44717	1.5	0.0670755	0.2078	0.2444	0.2659	0.0139383	0.0163933	0.0178354
Central & West Asia	Kazakhstan	Grapes	Fruits & Berries	88547	1.5	0.132821	0.2078	0.2444	0.2659	0.0276001	0.0324613	0.035317
Central & West Asia	Kuwait	Grapes	Fruits & Berries	214	1.5	0.000321	0.2078	0.2444	0.2659	6.67038e-05	7.84524e-05	8.53539e-05
Central & West Asia	Kyrgyzstan	Grapes	Fruits & Berries	8774	1.5	0.013161	0.2078	0.2444	0.2659	0.00273486	0.00321655	0.00349951
Central & West Asia	Lebanon	Grapes	Fruits & Berries	67184	1.5	0.100776	0.2078	0.2444	0.2659	0.0209413	0.0246297	0.0267963
Latin America	Mexico	Grapes	Fruits & Berries	430658	1.5	0.645987	0.2078	0.2444	0.2659	0.134236	0.157879	0.171768
South Asia	Pakistan	Grapes	Fruits & Berries	67180	1.5	0.10077	0.2078	0.2444	0.2659	0.02094	0.0246282	0.0267947
Central & West Asia	Palestine	Grapes	Fruits & Berries	34693	1.5	0.0520395	0.2078	0.2444	0.2659	0.0108138	0.0127185	0.0138373
Latin America	Paraguay	Grapes	Fruits & Berries	1930	1.5	0.002895	0.2078	0.2444	0.2659	0.000601581	0.000707538	0.000769781
Latin America	Peru	Grapes	Fruits & Berries	645545	1.5	0.968318	0.2078	0.2444	0.2659	0.201216	0.236657	0.257476
South East Asia	Philippines	Grapes	Fruits & Berries	212	1.5	0.000318	0.2078	0.2444	0.2659	6.60804e-05	7.77192e-05	8.45562e-05
Central & West Asia	Qatar	Grapes	Fruits & Berries	5	1.5	7.5e-06	0.2078	0.2444	0.2659	1.5585e-06	1.833e-06	1.99425e-06
East Asia	Republic of Korea	Grapes	Fruits & Berries	177391	1.5	0.266087	0.2078	0.2444	0.2659	0.0552928	0.0650315	0.0707524
Central & West Asia	Saudi Arabia	Grapes	Fruits & Berries	44845	1.5	0.0672675	0.2078	0.2444	0.2659	0.0139782	0.0164402	0.0178864
Central & West Asia	Syria	Grapes	Fruits & Berries	196000	1.5	0.294	0.2078	0.2444	0.2659	0.0610932	0.0718536	0.0781746
Central & West Asia	Tajikistan	Grapes	Fruits & Berries	241892	1.5	0.362838	0.2078	0.2444	0.2659	0.0753977	0.0886776	0.0964786
South East Asia	Thailand	Grapes	Fruits & Berries	82820	1.5	0.12423	0.2078	0.2444	0.2659	0.025815	0.0303618	0.0330328
Central & West Asia	Turkey	Grapes	Fruits & Berries	3933000	1.5	5.8995	0.2078	0.2444	0.2659	1.22592	1.44184	1.56868
Central & West Asia	Turkmenistan	Grapes	Fruits & Berries	239958	1.5	0.359937	0.2078	0.2444	0.2659	0.0747949	0.0879686	0.0957072
Central & West Asia	United Arab Emirates	Grapes	Fruits & Berries	31	1.5	4.65e-05	0.2078	0.2444	0.2659	9.6627e-06	1.13646e-05	1.23644e-05
North America	United States of America	Grapes	Fruits & Berries	6890970	1.5	10.3365	0.2078	0.2444	0.2659	2.14792	2.52623	2.74846
Latin America	Uruguay	Grapes	Fruits & Berries	104932	1.5	0.157398	0.2078	0.2444	0.2659	0.0327073	0.0384681	0.0418521
Central & West Asia	Uzbekistan	Grapes	Fruits & Berries	1589784	1.5	2.38468	0.2078	0.2444	0.2659	0.495536	0.582815	0.634085
Latin America	Venezuela (Bolivarian Republic of)	Grapes	Fruits & Berries	19798	1.5	0.029697	0.2078	0.2444	0.2659	0.00617104	0.00725795	0.00789643
South East Asia	Viet Nam	Grapes	Fruits & Berries	25165	1.5	0.0377475	0.2078	0.2444	0.2659	0.00784393	0.00922549	0.0100371
Central & West Asia	Yemen	Grapes	Fruits & Berries	136227	1.5	0.204341	0.2078	0.2444	0.2659	0.042462	0.0499408	0.0543341
Pacific		Grapes	Fruits & Berries	2090338	1.5	3.13551	0.2078	0.2444	0.2659	0.651558	0.766318	0.833731
Europe		Grapes	Fruits & Berries	29845052	1.5	44.7676	0.2078	0.2444	0.2659	9.3027	10.9412	11.9037
Africa		Grapes	Fruits & Berries	4847120	1.5	7.27068	0.2078	0.2444	0.2659	1.51085	1.77695	1.93327
Caribbean		Grapes	Fruits & Berries	21982	1.5	0.032973	0.2078	0.2444	0.2659	0.00685179	0.0080586	0.00876752
World		Grapes	Fruits & Berries	79125982	1.5	118.689	0.2078	0.2444	0.2659	24.6636	29.0076	31.5594
South East Asia	Indonesia	Kapok fruit	Fruits & Berries	196504	1.5	0.294756	0.2078	0.2444	0.2659	0.0612503	0.0720384	0.0783756
South East Asia	Thailand	Kapok fruit	Fruits & Berries	77779	1.5	0.116668	0.2078	0.2444	0.2659	0.0242437	0.0285138	0.0310222
World		Kapok fruit	Fruits & Berries	274283	1.5	0.411425	0.2078	0.2444	0.2659	0.085494	0.100552	0.109398
North America	Canada	Kiwi fruit	Fruits & Berries	30	1.5	4.5e-05	0.2078	0.2444	0.2659	9.351e-06	1.0998e-05	1.19655e-05
Latin America	Chile	Kiwi fruit	Fruits & Berries	230267	1.5	0.3454	0.2078	0.2444	0.2659	0.0717742	0.0844159	0.091842
East Asia	China	Kiwi fruit	Fruits & Berries	2035158	1.5	3.05274	0.2078	0.2444	0.2659	0.634359	0.746089	0.811723
Central & West Asia	Iran	Kiwi fruit	Fruits & Berries	266319	1.5	0.399479	0.2078	0.2444	0.2659	0.0830116	0.0976325	0.106221
Central & West Asia	Israel	Kiwi fruit	Fruits & Berries	4200	1.5	0.0063	0.2078	0.2444	0.2659	0.00130914	0.00153972	0.00167517
East Asia	Japan	Kiwi fruit	Fruits & Berries	25462	1.5	0.038193	0.2078	0.2444	0.2659	0.00793651	0.00933437	0.0101555
Central & West Asia	Kyrgyzstan	Kiwi fruit	Fruits & Berries	424	1.5	0.000636	0.2078	0.2444	0.2659	0.000132161	0.000155438	0.000169112
East Asia	Republic of Korea	Kiwi fruit	Fruits & Berries	7377	1.5	0.0110655	0.2078	0.2444	0.2659	0.00229941	0.00270441	0.00294232
Central & West Asia	Turkey	Kiwi fruit	Fruits & Berries	61920	1.5	0.09288	0.2078	0.2444	0.2659	0.0193005	0.0226999	0.0246968
North America	United States of America	Kiwi fruit	Fruits & Berries	34290	1.5	0.051435	0.2078	0.2444	0.2659	0.0106882	0.0125707	0.0136766
Pacific		Kiwi fruit	Fruits & Berries	417122	1.5	0.625683	0.2078	0.2444	0.2659	0.130017	0.152917	0.166369
Europe		Kiwi fruit	Fruits & Berries	939926	1.5	1.40989	0.2078	0.2444	0.2659	0.292975	0.344577	0.374889
Africa		Kiwi fruit	Fruits & Berries	35	1.5	5.25e-05	0.2078	0.2444	0.2659	1.09095e-05	1.2831e-05	1.39598e-05
World		Kiwi fruit	Fruits & Berries	4022650	1.5	6.03397	0.2078	0.2444	0.2659	1.25386	1.4747	1.60443
Latin America	Argentina	Lemons and limes	Fruits & Berries	1989400	1.5	2.9841	0.2078	0.2444	0.2659	0.620096	0.729314	0.793472
Central & West Asia	Azerbaijan	Lemons and limes	Fruits & Berries	4615	1.5	0.0069225	0.2078	0.2444	0.2659	0.0014385	0.00169186	0.00184069
Central & West Asia	Bahrain	Lemons and limes	Fruits & Berries	1088	1.5	0.001632	0.2078	0.2444	0.2659	0.00033913	0.000398861	0.000433949
South Asia	Bangladesh	Lemons and limes	Fruits & Berries	67077	1.5	0.100615	0.2078	0.2444	0.2659	0.0209079	0.0245904	0.0267537
Latin America	Bolivia (Plurinational State of)	Lemons and limes	Fruits & Berries	32484	1.5	0.048726	0.2078	0.2444	0.2659	0.0101253	0.0119086	0.0129562
Latin America	Brazil	Lemons and limes	Fruits & Berries	1481322	1.5	2.22198	0.2078	0.2444	0.2659	0.461728	0.543053	0.590825
South East Asia	Brunei	Lemons and limes	Fruits & Berries	66	1.5	9.9e-05	0.2078	0.2444	0.2659	2.05722e-05	2.41956e-05	2.63241e-05
South East Asia	Cambodia	Lemons and limes	Fruits & Berries	2898	1.5	0.004347	0.2078	0.2444	0.2659	0.000903307	0.00106241	0.00115587
Latin America	Chile	Lemons and limes	Fruits & Berries	151083	1.5	0.226625	0.2078	0.2444	0.2659	0.0470926	0.055387	0.0602595
East Asia	China	Lemons and limes	Fruits & Berries	2524315	1.5	3.78647	0.2078	0.2444	0.2659	0.786829	0.925414	1.00682
East Asia	Taiwan	Lemons and limes	Fruits & Berries	41431	1.5	0.0621465	0.2078	0.2444	0.2659	0.012914	0.0151886	0.0165248
Latin America	Colombia	Lemons and limes	Fruits & Berries	166372	1.5	0.249558	0.2078	0.2444	0.2659	0.0518582	0.060992	0.0663575
Latin America	Costa Rica	Lemons and limes	Fruits & Berries	36544	1.5	0.054816	0.2078	0.2444	0.2659	0.0113908	0.013397	0.0145756
Latin America	Ecuador	Lemons and limes	Fruits & Berries	24144	1.5	0.036216	0.2078	0.2444	0.2659	0.00752568	0.00885119	0.00962983
Latin America	El Salvador	Lemons and limes	Fruits & Berries	18082	1.5	0.027123	0.2078	0.2444	0.2659	0.00563616	0.00662886	0.00721201
Latin America	French Guyana	Lemons and limes	Fruits & Berries	8250	1.5	0.012375	0.2078	0.2444	0.2659	0.00257153	0.00302445	0.00329051
Central & West Asia	Georgia	Lemons and limes	Fruits & Berries	2400	1.5	0.0036	0.2078	0.2444	0.2659	0.00074808	0.00087984	0.00095724
Latin America	Guatemala	Lemons and limes	Fruits & Berries	124626	1.5	0.186939	0.2078	0.2444	0.2659	0.0388459	0.0456879	0.0497071
Latin America	Guyana	Lemons and limes	Fruits & Berries	6442	1.5	0.009663	0.2078	0.2444	0.2659	0.00200797	0.00236164	0.00256939
Latin America	Honduras	Lemons and limes	Fruits & Berries	7835	1.5	0.0117525	0.2078	0.2444	0.2659	0.00244217	0.00287231	0.00312499
South Asia	India	Lemons and limes	Fruits & Berries	3148000	1.5	4.722	0.2078	0.2444	0.2659	0.981232	1.15406	1.25558
Central & West Asia	Iran	Lemons and limes	Fruits & Berries	445460	1.5	0.66819	0.2078	0.2444	0.2659	0.13885	0.163306	0.177672
Central & West Asia	Iraq	Lemons and limes	Fruits & Berries	4221	1.5	0.0063315	0.2078	0.2444	0.2659	0.00131569	0.00154742	0.00168355
Central & West Asia	Israel	Lemons and limes	Fruits & Berries	71027	1.5	0.10654	0.2078	0.2444	0.2659	0.0221391	0.0260385	0.0283291
East Asia	Japan	Lemons and limes	Fruits & Berries	8094	1.5	0.012141	0.2078	0.2444	0.2659	0.0025229	0.00296726	0.00322829
Central & West Asia	Jordan	Lemons and limes	Fruits & Berries	32093	1.5	0.0481395	0.2078	0.2444	0.2659	0.0100034	0.0117653	0.0128003
Central & West Asia	Kuwait	Lemons and limes	Fruits & Berries	279	1.5	0.0004185	0.2078	0.2444	0.2659	8.69643e-05	0.000102281	0.000111279
Central & West Asia	Kyrgyzstan	Lemons and limes	Fruits & Berries	1	1.5	1.5e-06	0.2078	0.2444	0.2659	3.117e-07	3.666e-07	3.9885e-07
South East Asia	Laos	Lemons and limes	Fruits & Berries	6855	1.5	0.0102825	0.2078	0.2444	0.2659	0.0021367	0.00251304	0.00273412
Central & West Asia	Lebanon	Lemons and limes	Fruits & Berries	103001	1.5	0.154502	0.2078	0.2444	0.2659	0.0321054	0.0377602	0.0410819
South East Asia	Malaysia	Lemons and limes	Fruits & Berries	6997	1.5	0.0104955	0.2078	0.2444	0.2659	0.00218096	0.0025651	0.00279075
South Asia	Maldives	Lemons and limes	Fruits & Berries	40	1.5	6e-05	0.2078	0.2444	0.2659	1.2468e-05	1.4664e-05	1.5954e-05
Latin America	Mexico	Lemons and limes	Fruits & Berries	2547834	1.5	3.82175	0.2078	0.2444	0.2659	0.79416	0.934036	1.0162
South Asia	Nepal	Lemons and limes	Fruits & Berries	36433	1.5	0.0546495	0.2078	0.2444	0.2659	0.0113562	0.0133563	0.0145313
Central & West Asia	Oman	Lemons and limes	Fruits & Berries	7112	1.5	0.010668	0.2078	0.2444	0.2659	0.00221681	0.00260726	0.00283662
South Asia	Pakistan	Lemons and limes	Fruits & Berries	64528	1.5	0.096792	0.2078	0.2444	0.2659	0.0201134	0.023656	0.025737
Central & West Asia	Palestine	Lemons and limes	Fruits & Berries	13593	1.5	0.0203895	0.2078	0.2444	0.2659	0.00423694	0.00498319	0.00542157
Latin America	Paraguay	Lemons and limes	Fruits & Berries	9328	1.5	0.013992	0.2078	0.2444	0.2659	0.00290754	0.00341964	0.00372047
Latin America	Peru	Lemons and limes	Fruits & Berries	270663	1.5	0.405994	0.2078	0.2444	0.2659	0.0843657	0.0992251	0.107954
South East Asia	Philippines	Lemons and limes	Fruits & Berries	1006	1.5	0.001509	0.2078	0.2444	0.2659	0.00031357	0.0003688	0.000401243
East Asia	Republic of Korea	Lemons and limes	Fruits & Berries		1.5	0	0.2078	0.2444	0.2659	0	0	0
South Asia	Sri Lanka	Lemons and limes	Fruits & Berries	316260	1.5	0.47439	0.2078	0.2444	0.2659	0.0985782	0.115941	0.12614
Latin America	Suriname	Lemons and limes	Fruits & Berries	256	1.5	0.000384	0.2078	0.2444	0.2659	7.97952e-05	9.38496e-05	0.000102106
Central & West Asia	Syria	Lemons and limes	Fruits & Berries	161900	1.5	0.24285	0.2078	0.2444	0.2659	0.0504642	0.0593525	0.0645738
Central & West Asia	Tajikistan	Lemons and limes	Fruits & Berries	4208	1.5	0.006312	0.2078	0.2444	0.2659	0.00131163	0.00154265	0.00167836
South East Asia	Thailand	Lemons and limes	Fruits & Berries	120177	1.5	0.180265	0.2078	0.2444	0.2659	0.0374592	0.0440569	0.0479326
Central & West Asia	Turkey	Lemons and limes	Fruits & Berries	1100000	1.5	1.65	0.2078	0.2444	0.2659	0.34287	0.40326	0.438735
Central & West Asia	United Arab Emirates	Lemons and limes	Fruits & Berries	4847	1.5	0.0072705	0.2078	0.2444	0.2659	0.00151081	0.00177691	0.00193323
North America	United States of America	Lemons and limes	Fruits & Berries	812840	1.5	1.21926	0.2078	0.2444	0.2659	0.253362	0.297987	0.324201
Latin America	Uruguay	Lemons and limes	Fruits & Berries	37884	1.5	0.056826	0.2078	0.2444	0.2659	0.0118084	0.0138883	0.01511
Central & West Asia	Uzbekistan	Lemons and limes	Fruits & Berries	813	1.5	0.0012195	0.2078	0.2444	0.2659	0.000253412	0.000298046	0.000324265
Latin America	Venezuela (Bolivarian Republic of)	Lemons and limes	Fruits & Berries	75557	1.5	0.113336	0.2078	0.2444	0.2659	0.0235511	0.0276992	0.0301359
Central & West Asia	Yemen	Lemons and limes	Fruits & Berries	23023	1.5	0.0345345	0.2078	0.2444	0.2659	0.00717627	0.00844023	0.00918272
Pacific		Lemons and limes	Fruits & Berries	42802	1.5	0.064203	0.2078	0.2444	0.2659	0.0133414	0.0156912	0.0170716
Europe		Lemons and limes	Fruits & Berries	1592005	1.5	2.38801	0.2078	0.2444	0.2659	0.496228	0.583629	0.634971
Africa		Lemons and limes	Fruits & Berries	1519706	1.5	2.27956	0.2078	0.2444	0.2659	0.473692	0.557124	0.606135
Caribbean		Lemons and limes	Fruits & Berries	124575	1.5	0.186862	0.2078	0.2444	0.2659	0.03883	0.0456692	0.0496867
World		Lemons and limes	Fruits & Berries	19368838	1.5	29.0533	0.2078	0.2444	0.2659	6.03727	7.10062	7.72526
Latin America	Argentina	Mangoes, mangosteens, guavas	Fruits & Berries	2206	1.5	0.003309	0.2078	0.2444	0.2659	0.00068761	0.00080872	0.000879863
South Asia	Bangladesh	Mangoes, mangosteens, guavas	Fruits & Berries	1407308	1.5	2.11096	0.2078	0.2444	0.2659	0.438658	0.515919	0.561305
Latin America	Belize	Mangoes, mangosteens, guavas	Fruits & Berries	32	1.5	4.8e-05	0.2078	0.2444	0.2659	9.9744e-06	1.17312e-05	1.27632e-05
South Asia	Bhutan	Mangoes, mangosteens, guavas	Fruits & Berries	645	1.5	0.0009675	0.2078	0.2444	0.2659	0.000201047	0.000236457	0.000257258
Latin America	Bolivia (Plurinational State of)	Mangoes, mangosteens, guavas	Fruits & Berries	17613	1.5	0.0264195	0.2078	0.2444	0.2659	0.00548997	0.00645693	0.00702495
Latin America	Brazil	Mangoes, mangosteens, guavas	Fruits & Berries	1897904	1.5	2.84686	0.2078	0.2444	0.2659	0.591577	0.695772	0.756979
South East Asia	Cambodia	Mangoes, mangosteens, guavas	Fruits & Berries	69825	1.5	0.104737	0.2078	0.2444	0.2659	0.0217645	0.0255978	0.0278497
East Asia	China	Mangoes, mangosteens, guavas	Fruits & Berries	4992114	1.5	7.48817	0.2078	0.2444	0.2659	1.55604	1.83011	1.9911
East Asia	Taiwan	Mangoes, mangosteens, guavas	Fruits & Berries	146672	1.5	0.220008	0.2078	0.2444	0.2659	0.0457177	0.05377	0.0585001
Latin America	Colombia	Mangoes, mangosteens, guavas	Fruits & Berries	338080	1.5	0.50712	0.2078	0.2444	0.2659	0.10538	0.12394	0.134843
Latin America	Costa Rica	Mangoes, mangosteens, guavas	Fruits & Berries	53288	1.5	0.079932	0.2078	0.2444	0.2659	0.0166099	0.0195354	0.0212539
Latin America	Ecuador	Mangoes, mangosteens, guavas	Fruits & Berries	90718	1.5	0.136077	0.2078	0.2444	0.2659	0.0282768	0.0332572	0.0361829
Latin America	El Salvador	Mangoes, mangosteens, guavas	Fruits & Berries	31688	1.5	0.047532	0.2078	0.2444	0.2659	0.00987715	0.0116168	0.0126388
Latin America	French Guyana	Mangoes, mangosteens, guavas	Fruits & Berries	1810	1.5	0.002715	0.2078	0.2444	0.2659	0.000564177	0.000663546	0.000721919
Latin America	Guatemala	Mangoes, mangosteens, guavas	Fruits & Berries	95349	1.5	0.143023	0.2078	0.2444	0.2659	0.0297203	0.0349549	0.0380299
Latin America	Guyana	Mangoes, mangosteens, guavas	Fruits & Berries	7939	1.5	0.0119085	0.2078	0.2444	0.2659	0.00247459	0.00291044	0.00316647
Latin America	Honduras	Mangoes, mangosteens, guavas	Fruits & Berries	617	1.5	0.0009255	0.2078	0.2444	0.2659	0.000192319	0.000226192	0.00024609
South Asia	India	Mangoes, mangosteens, guavas	Fruits & Berries	21822000	1.5	32.733	0.2078	0.2444	0.2659	6.80192	7.99995	8.7037
South East Asia	Indonesia	Mangoes, mangosteens, guavas	Fruits & Berries	3083643	1.5	4.62546	0.2078	0.2444	0.2659	0.961172	1.13046	1.22991
Central & West Asia	Iran	Mangoes, mangosteens, guavas	Fruits & Berries	39772	1.5	0.059658	0.2078	0.2444	0.2659	0.0123969	0.0145804	0.0158631
Central & West Asia	Israel	Mangoes, mangosteens, guavas	Fruits & Berries	48096	1.5	0.072144	0.2078	0.2444	0.2659	0.0149915	0.017632	0.0191831
East Asia	Japan	Mangoes, mangosteens, guavas	Fruits & Berries	3307	1.5	0.0049605	0.2078	0.2444	0.2659	0.00103079	0.00121235	0.001319
South East Asia	Laos	Mangoes, mangosteens, guavas	Fruits & Berries	5087	1.5	0.0076305	0.2078	0.2444	0.2659	0.00158562	0.00186489	0.00202895
South East Asia	Malaysia	Mangoes, mangosteens, guavas	Fruits & Berries	67087	1.5	0.10063	0.2078	0.2444	0.2659	0.020911	0.0245941	0.0267576
South Asia	Maldives	Mangoes, mangosteens, guavas	Fruits & Berries	128	1.5	0.000192	0.2078	0.2444	0.2659	3.98976e-05	4.69248e-05	5.10528e-05
Latin America	Mexico	Mangoes, mangosteens, guavas	Fruits & Berries	2178927	1.5	3.26839	0.2078	0.2444	0.2659	0.679172	0.798795	0.869065
South East Asia	Myanmar	Mangoes, mangosteens, guavas	Fruits & Berries	1423	1.5	0.0021345	0.2078	0.2444	0.2659	0.000443549	0.000521672	0.000567564
South Asia	Nepal	Mangoes, mangosteens, guavas	Fruits & Berries	328271	1.5	0.492407	0.2078	0.2444	0.2659	0.102322	0.120344	0.130931
Central & West Asia	Oman	Mangoes, mangosteens, guavas	Fruits & Berries	15847	1.5	0.0237705	0.2078	0.2444	0.2659	0.00493951	0.00580951	0.00632058
South Asia	Pakistan	Mangoes, mangosteens, guavas	Fruits & Berries	2320050	1.5	3.48007	0.2078	0.2444	0.2659	0.72316	0.85053	0.925352
Central & West Asia	Palestine	Mangoes, mangosteens, guavas	Fruits & Berries	2613	1.5	0.0039195	0.2078	0.2444	0.2659	0.000814472	0.000957926	0.0010422
Latin America	Panama	Mangoes, mangosteens, guavas	Fruits & Berries	7311	1.5	0.0109665	0.2078	0.2444	0.2659	0.00227884	0.00268021	0.00291599
Latin America	Paraguay	Mangoes, mangosteens, guavas	Fruits & Berries	33408	1.5	0.050112	0.2078	0.2444	0.2659	0.0104133	0.0122474	0.0133248
Latin America	Peru	Mangoes, mangosteens, guavas	Fruits & Berries	383021	1.5	0.574531	0.2078	0.2444	0.2659	0.119388	0.140415	0.152768
South East Asia	Philippines	Mangoes, mangosteens, guavas	Fruits & Berries	725122	1.5	1.08768	0.2078	0.2444	0.2659	0.226021	0.26583	0.289215
South Asia	Sri Lanka	Mangoes, mangosteens, guavas	Fruits & Berries	516210	1.5	0.774315	0.2078	0.2444	0.2659	0.160903	0.189243	0.20589
Latin America	Suriname	Mangoes, mangosteens, guavas	Fruits & Berries	2707	1.5	0.0040605	0.2078	0.2444	0.2659	0.000843772	0.000992386	0.00107969
South East Asia	Thailand	Mangoes, mangosteens, guavas	Fruits & Berries	3791208	1.5	5.68681	0.2078	0.2444	0.2659	1.18172	1.38986	1.51212
South East Asia	Timor-Leste	Mangoes, mangosteens, guavas	Fruits & Berries	8099	1.5	0.0121485	0.2078	0.2444	0.2659	0.00252446	0.00296909	0.00323029
Central & West Asia	United Arab Emirates	Mangoes, mangosteens, guavas	Fruits & Berries	11626	1.5	0.017439	0.2078	0.2444	0.2659	0.00362382	0.00426209	0.00463703
North America	United States of America	Mangoes, mangosteens, guavas	Fruits & Berries	1019	1.5	0.0015285	0.2078	0.2444	0.2659	0.000317622	0.000373565	0.000406428
Latin America	Venezuela (Bolivarian Republic of)	Mangoes, mangosteens, guavas	Fruits & Berries	138674	1.5	0.208011	0.2078	0.2444	0.2659	0.0432247	0.0508379	0.0553101
South East Asia	Viet Nam	Mangoes, mangosteens, guavas	Fruits & Berries	779347	1.5	1.16902	0.2078	0.2444	0.2659	0.242922	0.285709	0.310843
Central & West Asia	Yemen	Mangoes, mangosteens, guavas	Fruits & Berries	360995	1.5	0.541493	0.2078	0.2444	0.2659	0.112522	0.132341	0.143983
Pacific		Mangoes, mangosteens, guavas	Fruits & Berries	62865	1.5	0.0942975	0.2078	0.2444	0.2659	0.019595	0.0230463	0.0250737
Europe		Mangoes, mangosteens, guavas	Fruits & Berries		1.5	0	0.2078	0.2444	0.2659	0	0	0
Africa		Mangoes, mangosteens, guavas	Fruits & Berries	8535320	1.5	12.803	0.2078	0.2444	0.2659	2.66046	3.12905	3.40431
Caribbean		Mangoes, mangosteens, guavas	Fruits & Berries	1103466	1.5	1.6552	0.2078	0.2444	0.2659	0.34395	0.404531	0.440117
World		Mangoes, mangosteens, guavas	Fruits & Berries	55383785	1.5	83.0757	0.2078	0.2444	0.2659	17.2631	20.3037	22.0898
South Asia	Afghanistan	Melons, other (inc.cantaloupes)	Fruits & Berries	329241	1.5	0.493862	0.2078	0.2444	0.2659	0.102624	0.1207	0.131318
Latin America	Argentina	Melons, other (inc.cantaloupes)	Fruits & Berries	81861	1.5	0.122791	0.2078	0.2444	0.2659	0.0255161	0.0300102	0.0326503
Central & West Asia	Azerbaijan	Melons, other (inc.cantaloupes)	Fruits & Berries	94668	1.5	0.142002	0.2078	0.2444	0.2659	0.029508	0.0347053	0.0377583
Central & West Asia	Bahrain	Melons, other (inc.cantaloupes)	Fruits & Berries	575	1.5	0.0008625	0.2078	0.2444	0.2659	0.000179228	0.000210795	0.000229339
South Asia	Bangladesh	Melons, other (inc.cantaloupes)	Fruits & Berries	227000	1.5	0.3405	0.2078	0.2444	0.2659	0.0707559	0.0832182	0.090539
Latin America	Belize	Melons, other (inc.cantaloupes)	Fruits & Berries	554	1.5	0.000831	0.2078	0.2444	0.2659	0.000172682	0.000203096	0.000220963
Latin America	Brazil	Melons, other (inc.cantaloupes)	Fruits & Berries	581478	1.5	0.872217	0.2078	0.2444	0.2659	0.181247	0.21317	0.231923
North America	Canada	Melons, other (inc.cantaloupes)	Fruits & Berries	18651	1.5	0.0279765	0.2078	0.2444	0.2659	0.00581352	0.00683746	0.00743895
Latin America	Chile	Melons, other (inc.cantaloupes)	Fruits & Berries	40679	1.5	0.0610185	0.2078	0.2444	0.2659	0.0126796	0.0149129	0.0162248
East Asia	China	Melons, other (inc.cantaloupes)	Fruits & Berries	12788218	1.5	19.1823	0.2078	0.2444	0.2659	3.98609	4.68816	5.10058
East Asia	Taiwan	Melons, other (inc.cantaloupes)	Fruits & Berries	60955	1.5	0.0914325	0.2078	0.2444	0.2659	0.0189997	0.0223461	0.0243119
Latin America	Colombia	Melons, other (inc.cantaloupes)	Fruits & Berries	75448	1.5	0.113172	0.2078	0.2444	0.2659	0.0235171	0.0276592	0.0300924
Latin America	Costa Rica	Melons, other (inc.cantaloupes)	Fruits & Berries	143015	1.5	0.214523	0.2078	0.2444	0.2659	0.0445778	0.0524293	0.0570415
East Asia	Democratic People's Republic of Korea	Melons, other (inc.cantaloupes)	Fruits & Berries	71127	1.5	0.10669	0.2078	0.2444	0.2659	0.0221703	0.0260752	0.028369
Latin America	Ecuador	Melons, other (inc.cantaloupes)	Fruits & Berries	18550	1.5	0.027825	0.2078	0.2444	0.2659	0.00578204	0.00680043	0.00739867
Latin America	El Salvador	Melons, other (inc.cantaloupes)	Fruits & Berries	654	1.5	0.000981	0.2078	0.2444	0.2659	0.000203852	0.000239756	0.000260848
Latin America	Guatemala	Melons, other (inc.cantaloupes)	Fruits & Berries	623405	1.5	0.935107	0.2078	0.2444	0.2659	0.194315	0.22854	0.248645
Latin America	Honduras	Melons, other (inc.cantaloupes)	Fruits & Berries	293234	1.5	0.439851	0.2078	0.2444	0.2659	0.091401	0.1075	0.116956
South Asia	India	Melons, other (inc.cantaloupes)	Fruits & Berries	1231000	1.5	1.8465	0.2078	0.2444	0.2659	0.383703	0.451285	0.490984
South East Asia	Indonesia	Melons, other (inc.cantaloupes)	Fruits & Berries	118708	1.5	0.178062	0.2078	0.2444	0.2659	0.0370013	0.0435184	0.0473467
Central & West Asia	Iran	Melons, other (inc.cantaloupes)	Fruits & Berries	1731443	1.5	2.59716	0.2078	0.2444	0.2659	0.539691	0.634747	0.690586
Central & West Asia	Iraq	Melons, other (inc.cantaloupes)	Fruits & Berries	113538	1.5	0.170307	0.2078	0.2444	0.2659	0.0353898	0.041623	0.0452846
Central & West Asia	Israel	Melons, other (inc.cantaloupes)	Fruits & Berries	27389	1.5	0.0410835	0.2078	0.2444	0.2659	0.00853715	0.0100408	0.0109241
East Asia	Japan	Melons, other (inc.cantaloupes)	Fruits & Berries	143078	1.5	0.214617	0.2078	0.2444	0.2659	0.0445974	0.0524524	0.0570667
Central & West Asia	Jordan	Melons, other (inc.cantaloupes)	Fruits & Berries	40673	1.5	0.0610095	0.2078	0.2444	0.2659	0.0126778	0.0149107	0.0162224
Central & West Asia	Kazakhstan	Melons, other (inc.cantaloupes)	Fruits & Berries	893857	1.5	1.34079	0.2078	0.2444	0.2659	0.278615	0.327688	0.356515
Central & West Asia	Kuwait	Melons, other (inc.cantaloupes)	Fruits & Berries	2811	1.5	0.0042165	0.2078	0.2444	0.2659	0.000876189	0.00103051	0.00112117
South East Asia	Laos	Melons, other (inc.cantaloupes)	Fruits & Berries	20235	1.5	0.0303525	0.2078	0.2444	0.2659	0.00630725	0.00741815	0.00807073
Central & West Asia	Lebanon	Melons, other (inc.cantaloupes)	Fruits & Berries	13091	1.5	0.0196365	0.2078	0.2444	0.2659	0.00408046	0.00479916	0.00522135
Latin America	Mexico	Melons, other (inc.cantaloupes)	Fruits & Berries	594608	1.5	0.891912	0.2078	0.2444	0.2659	0.185339	0.217983	0.237159
Central & West Asia	Oman	Melons, other (inc.cantaloupes)	Fruits & Berries	33463	1.5	0.0501945	0.2078	0.2444	0.2659	0.0104304	0.0122675	0.0133467
South Asia	Pakistan	Melons, other (inc.cantaloupes)	Fruits & Berries	9809	1.5	0.0147135	0.2078	0.2444	0.2659	0.00305747	0.00359598	0.00391232
Central & West Asia	Palestine	Melons, other (inc.cantaloupes)	Fruits & Berries	2651	1.5	0.0039765	0.2078	0.2444	0.2659	0.000826317	0.000971857	0.00105735
Latin America	Panama	Melons, other (inc.cantaloupes)	Fruits & Berries	8848	1.5	0.013272	0.2078	0.2444	0.2659	0.00275792	0.00324368	0.00352902
Latin America	Paraguay	Melons, other (inc.cantaloupes)	Fruits & Berries	31775	1.5	0.0476625	0.2078	0.2444	0.2659	0.00990427	0.0116487	0.0126735
Latin America	Peru	Melons, other (inc.cantaloupes)	Fruits & Berries	20014	1.5	0.030021	0.2078	0.2444	0.2659	0.00623836	0.00733713	0.00798258
South East Asia	Philippines	Melons, other (inc.cantaloupes)	Fruits & Berries	7869	1.5	0.0118035	0.2078	0.2444	0.2659	0.00245277	0.00288478	0.00313855
Central & West Asia	Qatar	Melons, other (inc.cantaloupes)	Fruits & Berries	2463	1.5	0.0036945	0.2078	0.2444	0.2659	0.000767717	0.000902936	0.000982368
East Asia	Republic of Korea	Melons, other (inc.cantaloupes)	Fruits & Berries	167638	1.5	0.251457	0.2078	0.2444	0.2659	0.0522528	0.0614561	0.0668624
Central & West Asia	Saudi Arabia	Melons, other (inc.cantaloupes)	Fruits & Berries	39360	1.5	0.05904	0.2078	0.2444	0.2659	0.0122685	0.0144294	0.0156987
Central & West Asia	Syria	Melons, other (inc.cantaloupes)	Fruits & Berries	54000	1.5	0.081	0.2078	0.2444	0.2659	0.0168318	0.0197964	0.0215379
Central & West Asia	Turkey	Melons, other (inc.cantaloupes)	Fruits & Berries	1753942	1.5	2.63091	0.2078	0.2444	0.2659	0.546704	0.642995	0.69956
Central & West Asia	United Arab Emirates	Melons, other (inc.cantaloupes)	Fruits & Berries	3686	1.5	0.005529	0.2078	0.2444	0.2659	0.00114893	0.00135129	0.00147016
North America	United States of America	Melons, other (inc.cantaloupes)	Fruits & Berries	872080	1.5	1.30812	0.2078	0.2444	0.2659	0.271827	0.319705	0.347829
Latin America	Uruguay	Melons, other (inc.cantaloupes)	Fruits & Berries	1924	1.5	0.002886	0.2078	0.2444	0.2659	0.000599711	0.000705338	0.000767387
Latin America	Venezuela (Bolivarian Republic of)	Melons, other (inc.cantaloupes)	Fruits & Berries	205179	1.5	0.307769	0.2078	0.2444	0.2659	0.0639543	0.0752186	0.0818356
Central & West Asia	Yemen	Melons, other (inc.cantaloupes)	Fruits & Berries	27029	1.5	0.0405435	0.2078	0.2444	0.2659	0.00842494	0.00990883	0.0107805
Pacific		Melons, other (inc.cantaloupes)	Fruits & Berries	229526	1.5	0.344289	0.2078	0.2444	0.2659	0.0715433	0.0841442	0.0915464
Europe		Melons, other (inc.cantaloupes)	Fruits & Berries	1919943	1.5	2.87991	0.2078	0.2444	0.2659	0.598446	0.703851	0.765769
Africa		Melons, other (inc.cantaloupes)	Fruits & Berries	1514852	1.5	2.27228	0.2078	0.2444	0.2659	0.472179	0.555345	0.604199
Caribbean		Melons, other (inc.cantaloupes)	Fruits & Berries	113911	1.5	0.170867	0.2078	0.2444	0.2659	0.0355061	0.0417598	0.0454334
World		Melons, other (inc.cantaloupes)	Fruits & Berries	27349214	1.5	41.0238	0.2078	0.2444	0.2659	8.52475	10.0262	10.9082
South Asia	Afghanistan	Olives	Fruits & Berries	7770	1.5	0.011655	0.2078	0.2444	0.2659	0.00242191	0.00284848	0.00309906
Latin America	Argentina	Olives	Fruits & Berries	174709	1.5	0.262064	0.2078	0.2444	0.2659	0.0544568	0.0640483	0.0696827
Central & West Asia	Azerbaijan	Olives	Fruits & Berries	1073	1.5	0.0016095	0.2078	0.2444	0.2659	0.000334454	0.000393362	0.000427966
Latin America	Brazil	Olives	Fruits & Berries	1620	1.5	0.00243	0.2078	0.2444	0.2659	0.000504954	0.000593892	0.000646137
Latin America	Chile	Olives	Fruits & Berries	110251	1.5	0.165377	0.2078	0.2444	0.2659	0.0343652	0.040418	0.0439736
East Asia	China	Olives	Fruits & Berries	2630	1.5	0.003945	0.2078	0.2444	0.2659	0.000819771	0.000964158	0.00104898
East Asia	Taiwan	Olives	Fruits & Berries	2630	1.5	0.003945	0.2078	0.2444	0.2659	0.000819771	0.000964158	0.00104898
Latin America	El Salvador	Olives	Fruits & Berries	11717	1.5	0.0175755	0.2078	0.2444	0.2659	0.00365219	0.00429545	0.00467333
Central & West Asia	Iran	Olives	Fruits & Berries	84805	1.5	0.127208	0.2078	0.2444	0.2659	0.0264337	0.0310895	0.0338245
Central & West Asia	Iraq	Olives	Fruits & Berries	9268	1.5	0.013902	0.2078	0.2444	0.2659	0.00288884	0.00339765	0.00369654
Central & West Asia	Israel	Olives	Fruits & Berries	54500	1.5	0.08175	0.2078	0.2444	0.2659	0.0169876	0.0199797	0.0217373
Central & West Asia	Jordan	Olives	Fruits & Berries	158064	1.5	0.237096	0.2078	0.2444	0.2659	0.0492685	0.0579463	0.0630438
Central & West Asia	Kuwait	Olives	Fruits & Berries	78	1.5	0.000117	0.2078	0.2444	0.2659	2.43126e-05	2.85948e-05	3.11103e-05
Central & West Asia	Lebanon	Olives	Fruits & Berries	117413	1.5	0.17612	0.2078	0.2444	0.2659	0.0365976	0.0430436	0.0468302
Latin America	Mexico	Olives	Fruits & Berries	15107	1.5	0.0226605	0.2078	0.2444	0.2659	0.00470885	0.00553823	0.00602543
Central & West Asia	Palestine	Olives	Fruits & Berries	95472	1.5	0.143208	0.2078	0.2444	0.2659	0.0297586	0.035	0.038079
Latin America	Peru	Olives	Fruits & Berries	188982	1.5	0.283473	0.2078	0.2444	0.2659	0.0589057	0.0692808	0.0753755
Central & West Asia	Syria	Olives	Fruits & Berries	400000	1.5	0.6	0.2078	0.2444	0.2659	0.12468	0.14664	0.15954
Central & West Asia	Turkey	Olives	Fruits & Berries	1500467	1.5	2.2507	0.2078	0.2444	0.2659	0.467696	0.550071	0.598461
North America	United States of America	Olives	Fruits & Berries	138596	1.5	0.207894	0.2078	0.2444	0.2659	0.0432004	0.0508093	0.055279
Latin America	Uruguay	Olives	Fruits & Berries	6655	1.5	0.0099825	0.2078	0.2444	0.2659	0.00207436	0.00243972	0.00265435
Central & West Asia	Uzbekistan	Olives	Fruits & Berries	117	1.5	0.0001755	0.2078	0.2444	0.2659	3.64689e-05	4.28922e-05	4.66655e-05
Pacific		Olives	Fruits & Berries	62179	1.5	0.0932685	0.2078	0.2444	0.2659	0.0193812	0.0227948	0.0248001
Europe		Olives	Fruits & Berries	13701251	1.5	20.5519	0.2078	0.2444	0.2659	4.27068	5.02288	5.46474
Africa		Olives	Fruits & Berries	4204148	1.5	6.30622	0.2078	0.2444	0.2659	1.31043	1.54124	1.67682
World		Olives	Fruits & Berries	21066062	1.5	31.5991	0.2078	0.2444	0.2659	6.56629	7.72282	8.4022
South Asia	Afghanistan	Oranges	Fruits & Berries	4707	1.5	0.0070605	0.2078	0.2444	0.2659	0.00146717	0.00172559	0.00187739
Latin America	Argentina	Oranges	Fruits & Berries	1006779	1.5	1.51017	0.2078	0.2444	0.2659	0.313813	0.369085	0.401554
Central & West Asia	Azerbaijan	Oranges	Fruits & Berries	3090	1.5	0.004635	0.2078	0.2444	0.2659	0.000963153	0.00113279	0.00123245
South Asia	Bangladesh	Oranges	Fruits & Berries	3315	1.5	0.0049725	0.2078	0.2444	0.2659	0.00103329	0.00121528	0.00132219
Latin America	Belize	Oranges	Fruits & Berries	99341	1.5	0.149011	0.2078	0.2444	0.2659	0.0309646	0.0364184	0.0396222
South Asia	Bhutan	Oranges	Fruits & Berries	32149	1.5	0.0482235	0.2078	0.2444	0.2659	0.0100208	0.0117858	0.0128226
Latin America	Bolivia (Plurinational State of)	Oranges	Fruits & Berries	189335	1.5	0.284002	0.2078	0.2444	0.2659	0.0590157	0.0694102	0.0755163
Latin America	Brazil	Oranges	Fruits & Berries	16713534	1.5	25.0703	0.2078	0.2444	0.2659	5.20961	6.12718	6.66619
South East Asia	Brunei	Oranges	Fruits & Berries	462	1.5	0.000693	0.2078	0.2444	0.2659	0.000144005	0.000169369	0.000184269
South East Asia	Cambodia	Oranges	Fruits & Berries	66462	1.5	0.099693	0.2078	0.2444	0.2659	0.0207162	0.024365	0.0265084
Latin America	Chile	Oranges	Fruits & Berries	113565	1.5	0.170348	0.2078	0.2444	0.2659	0.0353982	0.0416329	0.0452954
East Asia	China	Oranges	Fruits & Berries	9246305	1.5	13.8695	0.2078	0.2444	0.2659	2.88207	3.3897	3.68789
East Asia	Taiwan	Oranges	Fruits & Berries	142397	1.5	0.213595	0.2078	0.2444	0.2659	0.0443851	0.0522027	0.056795
Latin America	Colombia	Oranges	Fruits & Berries	243151	1.5	0.364727	0.2078	0.2444	0.2659	0.0757902	0.0891392	0.0969808
Latin America	Costa Rica	Oranges	Fruits & Berries	236774	1.5	0.355161	0.2078	0.2444	0.2659	0.0738025	0.0868013	0.0944373
Latin America	Ecuador	Oranges	Fruits & Berries	103121	1.5	0.154681	0.2078	0.2444	0.2659	0.0321428	0.0378042	0.0411298
Latin America	El Salvador	Oranges	Fruits & Berries	64242	1.5	0.096363	0.2078	0.2444	0.2659	0.0200242	0.0235511	0.0256229
Latin America	French Guyana	Oranges	Fruits & Berries	4500	1.5	0.00675	0.2078	0.2444	0.2659	0.00140265	0.0016497	0.00179483
Central & West Asia	Georgia	Oranges	Fruits & Berries	1600	1.5	0.0024	0.2078	0.2444	0.2659	0.00049872	0.00058656	0.00063816
Latin America	Guatemala	Oranges	Fruits & Berries	177396	1.5	0.266094	0.2078	0.2444	0.2659	0.0552943	0.0650334	0.0707544
Latin America	Guyana	Oranges	Fruits & Berries	21734	1.5	0.032601	0.2078	0.2444	0.2659	0.00677449	0.00796768	0.00866861
Latin America	Honduras	Oranges	Fruits & Berries	261572	1.5	0.392358	0.2078	0.2444	0.2659	0.081532	0.0958923	0.104328
South Asia	India	Oranges	Fruits & Berries	8367000	1.5	12.5505	0.2078	0.2444	0.2659	2.60799	3.06734	3.33718
South East Asia	Indonesia	Oranges	Fruits & Berries	2510442	1.5	3.76566	0.2078	0.2444	0.2659	0.782505	0.920328	1.00129
Central & West Asia	Iran	Oranges	Fruits & Berries	1889252	1.5	2.83388	0.2078	0.2444	0.2659	0.58888	0.6926	0.753528
Central & West Asia	Iraq	Oranges	Fruits & Berries	70963	1.5	0.106444	0.2078	0.2444	0.2659	0.0221192	0.026015	0.0283036
Central & West Asia	Israel	Oranges	Fruits & Berries	79820	1.5	0.11973	0.2078	0.2444	0.2659	0.0248799	0.029262	0.0318362
East Asia	Japan	Oranges	Fruits & Berries	36040	1.5	0.05406	0.2078	0.2444	0.2659	0.0112337	0.0132123	0.0143746
Central & West Asia	Jordan	Oranges	Fruits & Berries	42178	1.5	0.063267	0.2078	0.2444	0.2659	0.0131469	0.0154625	0.0168227
Central & West Asia	Kuwait	Oranges	Fruits & Berries	257	1.5	0.0003855	0.2078	0.2444	0.2659	8.01069e-05	9.42162e-05	0.000102504
South East Asia	Laos	Oranges	Fruits & Berries	45357	1.5	0.0680355	0.2078	0.2444	0.2659	0.0141378	0.0166279	0.0180906
Central & West Asia	Lebanon	Oranges	Fruits & Berries	126994	1.5	0.190491	0.2078	0.2444	0.2659	0.039584	0.046556	0.0506516
South East Asia	Malaysia	Oranges	Fruits & Berries	13437	1.5	0.0201555	0.2078	0.2444	0.2659	0.00418831	0.004926	0.00535935
Latin America	Mexico	Oranges	Fruits & Berries	4737990	1.5	7.10698	0.2078	0.2444	0.2659	1.47683	1.73695	1.88975
South Asia	Nepal	Oranges	Fruits & Berries	41556	1.5	0.062334	0.2078	0.2444	0.2659	0.012953	0.0152344	0.0165746
Latin America	Nicaragua	Oranges	Fruits & Berries	118696	1.5	0.178044	0.2078	0.2444	0.2659	0.0369975	0.043514	0.0473419
South Asia	Pakistan	Oranges	Fruits & Berries	1589856	1.5	2.38478	0.2078	0.2444	0.2659	0.495558	0.582841	0.634114
Central & West Asia	Palestine	Oranges	Fruits & Berries	16241	1.5	0.0243615	0.2078	0.2444	0.2659	0.00506232	0.00595395	0.00647772
Latin America	Panama	Oranges	Fruits & Berries	40967	1.5	0.0614505	0.2078	0.2444	0.2659	0.0127694	0.0150185	0.0163397
Latin America	Paraguay	Oranges	Fruits & Berries	223426	1.5	0.335139	0.2078	0.2444	0.2659	0.0696419	0.081908	0.0891135
Latin America	Peru	Oranges	Fruits & Berries	502822	1.5	0.754233	0.2078	0.2444	0.2659	0.15673	0.184335	0.200551
South East Asia	Philippines	Oranges	Fruits & Berries	2365	1.5	0.0035475	0.2078	0.2444	0.2659	0.000737171	0.000867009	0.00094328
South Asia	Sri Lanka	Oranges	Fruits & Berries	56788	1.5	0.085182	0.2078	0.2444	0.2659	0.0177008	0.0208185	0.0226499
Latin America	Suriname	Oranges	Fruits & Berries	19131	1.5	0.0286965	0.2078	0.2444	0.2659	0.00596313	0.00701342	0.0076304
Central & West Asia	Syria	Oranges	Fruits & Berries	693000	1.5	1.0395	0.2078	0.2444	0.2659	0.216008	0.254054	0.276403
Central & West Asia	Tajikistan	Oranges	Fruits & Berries	1726	1.5	0.002589	0.2078	0.2444	0.2659	0.000537994	0.000632752	0.000688415
South East Asia	Thailand	Oranges	Fruits & Berries	516426	1.5	0.774639	0.2078	0.2444	0.2659	0.16097	0.189322	0.205977
[truncated: 3,357 more rows]

## Sheet: ST2.2 Region Residue production
Region	Lignocellulosic content (Megatonnes/year)	Cellulose Content (Megatonnes/year)	Hemi-cellulose Content (Megatonnes/year)	Lignin Content (Megatonnes/year)	Residue Production (Megatonnes/year)
South East Asia	1107.38	494.21	352.93	260.24	1576.51
South Asia	1773.86	800.58	580.28	393	2624.38
Pacific	87.39	38.52	28.01	20.86	122.041
North America	1380.07	662.14	443.78	274.15	2030.37
Latin America	1513.33	730.65	507.27	275.41	2360.98
Europe	1300.39	716.1	238.75	345.54	2340.59
East Asia	2388.75	1010.5	802.13	576.12	3847.09
Central & West Asia	506	207.79	167.84	130.37	757.469
Caribbean	43.98	16.54	14.77	12.67	64.9031
Africa	1006.86	417.34	346.49	243.03	1595.26
Global	11108	5094.37	3482.25	2531.39	17319.6

## Sheet: ST2.3 Residue lignocellulosic %
Agricultural Residue	Lignin %	Hemicellulose %	Cellulose %
Brewing	22.1	9.5	49.8
Cereal Grains	13.56	23.92	34.51
Fibre Crops	12.01	14.32	54.34
Fruits & Berries	26.59	24.44	20.78
Oil Crops	24.4	24.86	32.93
Pulses	6.11	11.1	28.38
Roots & Tubers	2.96	20.83	12.05
Seeds & Nuts	42.83	19.41	27.57
Sugar Crops	15.04	25.71	33.78
Tobacco	12.19	22.37	27.08
Vegetables	2.57	4.99	3.75

## Sheet: ST2.4 data summary
Product category	(All)
Product	(All)
Region	Sum of Average Residue Cellulose content Megatonnes/year	Sum of Average Residue Hemi-cellulose contents, Megatonnes/year	Sum of Average Residue Lignin content, Megatonnes/year	Sum of Residue Production tonnes/year
Africa	417.344	346.495	243.031	1.59526e+09
Caribbean	16.5411	14.7736	12.6738	6.49031e+07
Central & West Asia	207.787	167.835	130.37	7.57469e+08
East Asia	1010.5	802.131	576.115	3.84709e+09
Europe	716.096	538.755	345.542	2.34059e+09
Latin America	730.645	507.275	375.407	2.36098e+09
North America	662.144	443.779	274.152	2.03037e+09
Pacific	38.5196	28.0113	20.862	1.22041e+08
South Asia	800.582	580.281	392.995	2.62438e+09
South East Asia	494.209	352.927	260.244	1.57651e+09
Grand Total	5094.37	3782.26	2631.39	1.73196e+10
